# Supplementary material for: Patterns of care of brain tumor-related epilepsy. A cohort study done in Italian Epilepsy Center
Source: PubMed Central journal article supplement (PMC5513411; doi:10.1371/journal.pone.0180470), 2017-07-17
Supplement: pone.0180470.s001.pdf [file pone.0180470.s001.pdf]

VAR00001

| CENTER        | AGE   | SEX | KPS    | Histology                 | Lesion_site  | Lesion_site_cod | Surgery1 | Surgery1_type               |
|---------------|-------|-----|--------|---------------------------|--------------|-----------------|----------|-----------------------------|
| 1.00 BERGAMO  | 69.00 | M   | 70.00  | METASTASES                | MULTILOBULAR | MULTICENTRIC    | NO       |                             |
| 2.00 BERGAMO  | 56.00 | M   | 50.00  | GBM                       | MULTICENTRIC | MULTICENTRIC    | NO       |                             |
| 3.00 BERGAMO  | 60.00 | F   | 60.00  | METASTASES                | MULTILOBULAR | MULTICENTRIC    | NO       |                             |
| 4.00 BERGAMO  | 64.00 | F   | 70.00  | METASTASES                | MULTILOBULAR | MULTICENTRIC    | NO       |                             |
| 5.00 BERGAMO  | 57.00 | M   | 70.00  | METASTASES                | FRONTAL      | FRONTAL         | YES      | BIOPSY                      |
| 6.00 BERGAMO  | 56.00 | F   | 70.00  | METASTASES                | MULTILOBULAR | MULTICENTRIC    | NO       |                             |
| 7.00 BERGAMO  | 74.00 | M   | 80.00  | METASTASES                | MULTILOBULAR | MULTICENTRIC    | NO       |                             |
| 8.00 BERGAMO  | 64.00 | F   | 90.00  | GBM                       | FRONTAL      | FRONTAL         | YES      | PARTIAL RESECTION (<90%)    |
| 9.00 BERGAMO  | 68.00 | M   | 70.00  | METASTASES                | MULTILOBULAR | MULTICENTRIC    | NO       |                             |
| 10.00 BERGAMO | 41.00 | F   | 90.00  | METASTASES                | MULTILOBULAR | MULTICENTRIC    | NO       |                             |
| 11.00 BERGAMO | 54.00 | M   | 100.00 | OTHER (ATIPIC MENINGIOMI) | FRONTAL      | FRONTAL         | YES      | BIOPSY                      |
| 12.00 BERGAMO | 13.00 | M   | 90.00  | ASTROC III                | TEMPORAL     | TEMPORAL        | YES      | BIOPSY                      |
| 13.00 BERGAMO | 47.00 | F   | 90.00  | OLIGODENDROGLIOMA III     | FRONTAL      | FRONTAL         | YES      | GROSS TOTAL RESECTION (>90) |
| 14.00 BERGAMO | 28.00 | F   | 100.00 | METASTASES                | TEMPORAL     | TEMPORAL        | YES      | GROSS TOTAL RESECTION (>90) |
| 15.00 BERGAMO | 69.00 | F   | 90.00  | OTHER (ATIPIC MENINGIOMI) | FRONTAL      | FRONTAL         | YES      | GROSS TOTAL RESECTION (>90) |
| 16.00 BERGAMO | 52.00 | F   | 100.00 | OTHER (ATIPIC MENINGIOMI) | TEMPORAL     | TEMPORAL        | YES      | BIOPSY                      |
| 17.00 BERGAMO | 64.00 | F   | 100.00 | OTHER (ATIPIC MENINGIOMI) | FRONTAL      | FRONTAL         | YES      | GROSS TOTAL RESECTION (>90) |
| 18.00 BERGAMO | 57.00 | M   | 100.00 | OTHER (ATIPIC MENINGIOMI) | FRONTAL      | FRONTAL         | YES      | GROSS TOTAL RESECTION (>90) |
| 19.00 BERGAMO | 39.00 | M   | 90.00  | ASTRO II                  | FRONTAL      | FRONTAL         | YES      | PARTIAL RESECTION (<90%)    |
| 20.00 BERGAMO | 51.00 | M   | 90.00  | OLIGODENDROGLIOMA II      | FRONTAL      | FRONTAL         | YES      | GROSS TOTAL RESECTION (>90) |
| 21.00 BERGAMO | 55.00 | M   | 100.00 | ASTRO II                  | TEMPORAL     | TEMPORAL        | YES      | BIOPSY                      |
| 22.00 BERGAMO | 62.00 | M   | 100.00 | OTHER (ATIPIC MENINGIOMI) | FRONTAL      | FRONTAL         | YES      | BIOPSY                      |
| 23.00 BERGAMO | 77.00 | F   | 90.00  | OTHER (ATIPIC MENINGIOMI) | TEMPORAL     | TEMPORAL        | YES      | GROSS TOTAL RESECTION (>90) |
| 24.00 BERGAMO | 63.00 | F   | 100.00 | OTHER (ATIPIC MENINGIOMI) | FRONTAL      | FRONTAL         | YES      | GROSS TOTAL RESECTION (>90) |
| 25.00 BERGAMO | 53.00 | M   | 100.00 | OTHER (ATIPIC MENINGIOMI) | FRONTAL      | FRONTAL         | YES      | GROSS TOTAL RESECTION (>90) |
| 26.00 BERGAMO | 75.00 | F   | 90.00  | OTHER (ATIPIC MENINGIOMI) | FRONTAL      | FRONTAL         | YES      | GROSS TOTAL RESECTION (>90) |
| 27.00 BERGAMO | 73.00 | M   | 80.00  | METASTASES                | PARIETAL     | PARIETAL        | YES      | GROSS TOTAL RESECTION (>90) |
| 28.00 BERGAMO | 40.00 | F   | 100.00 | ASTRO II                  | TEMPORAL     | TEMPORAL        | YES      | GROSS TOTAL RESECTION (>90) |
| 29.00 BERGAMO | 25.00 | M   | 100.00 | ASTRO II                  | FRONTAL      | FRONTAL         | YES      | GROSS TOTAL RESECTION (>90) |
| 30.00 BERGAMO | 52.00 | F   | 90.00  | OTHER (ATIPIC MENINGIOMI) | PARIETAL     | PARIETAL        | YES      | BIOPSY                      |
| 31.00 BERGAMO | 48.00 | M   | 90.00  | OLIGOASTROCITOMA II       | PARIETAL     | PARIETAL        | YES      | PARTIAL RESECTION (<90%)    |
| 32.00 BERGAMO | 42.00 | M   | 100.00 | OTHER (ATIPIC MENINGIOMI) | FRONTAL      | FRONTAL         | YES      | GROSS TOTAL RESECTION (>90) |
| 33.00 BERGAMO | 60.00 | F   | 90.00  | METASTASES                | PARIETAL     | PARIETAL        | YES      | GROSS TOTAL RESECTION (>90) |
| 34.00 BERGAMO | 49.00 | F   | 100.00 | ASTROC III                | FRONTAL      | FRONTAL         | YES      | GROSS TOTAL RESECTION (>90) |
| 35.00 BERGAMO | 58.00 | F   | 90.00  | OTHER (ATIPIC MENINGIOMI) | FRONTAL      | FRONTAL         | YES      | GROSS TOTAL RESECTION (>90) |
| 36.00 BERGAMO | 50.00 | M   | 100.00 | OTHER (ATIPIC MENINGIOMI) | FRONTAL      | FRONTAL         | YES      | GROSS TOTAL RESECTION (>90) |
| 37.00 BERGAMO | 72.00 | F   | 90.00  | OTHER (ATIPIC MENINGIOMI) | PARIETAL     | PARIETAL        | YES      | GROSS TOTAL RESECTION (>90) |
| 38.00 BERGAMO | 72.00 | M   | 90.00  | OTHER (ATIPIC MENINGIOMI) | FRONTAL      | FRONTAL         | YES      | BIOPSY                      |
| 39.00 BERGAMO | 25.00 | M   | 90.00  | OTHER (ATIPIC MENINGIOMI) | OCCIPITAL    | OCCIPITAL       | YES      | PARTIAL RESECTION (<90%)    |

|       |                  |       |   |        |                           |                    |                    |     |                              |
|-------|------------------|-------|---|--------|---------------------------|--------------------|--------------------|-----|------------------------------|
| 40.00 | BERGAMO          | 40.00 | M | 90.00  | ASTROC III                | FRONTAL            | FRONTAL            | YES | PARTIAL RESECTION (<90%)     |
| 41.00 | BERGAMO          | 25.00 | M | 90.00  | ASTROC III                | FRONTAL            | FRONTAL            | YES | GROSS TOTAL RESECTION (>90%) |
| 42.00 | UDINE-AZ OSP UNI | 12.00 | M | 100.00 | ASTROC III                | TEMPORAL           | TEMPORAL           | YES | GROSS TOTAL RESECTION (>90%) |
| 43.00 | UDINE-AZ OSP UNI | 2.00  | M | 30.00  | ASTROC III                |                    |                    | YES | PARTIAL RESECTION (<90%)     |
| 44.00 | UDINE-AZ OSP UNI | 15.00 | M |        | ASTRO II                  | TEMPORAL           | TEMPORAL           | YES | GROSS TOTAL RESECTION (>90%) |
| 45.00 | UDINE-AZ OSP UNI | 21.00 | M |        | ASTRO II                  | FRONTAL+TEMPORAL   | FRONTAL+TEMPORAL   | YES | PARTIAL RESECTION (<90%)     |
| 46.00 | UDINE-AZ OSP UNI | 9.00  | F |        | ASTROC III                | HYPOTHALAMIC OP    | HYPOTHALAMIC OP    | YES | PARTIAL RESECTION (<90%)     |
| 47.00 | UDINE-AZ OSP UNI |       | F | 100.00 | ASTRO II                  | PARIETAL+OCCIPITAL | PARIETAL+OCCIPITAL | YES | GROSS TOTAL RESECTION (>90%) |
| 48.00 | UDINE-AZ OSP UNI | 2.00  | M |        | OLIGODENDROGLIOMA II      | TEMPORAL           | TEMPORAL           | YES | GROSS TOTAL RESECTION (>90%) |
| 49.00 | UDINE-AZ OSP UNI | 7.00  | M |        | OLIGOASTROCITOMA II       | PARIETAL+OCCIPITAL | PARIETAL+OCCIPITAL | YES | PARTIAL RESECTION (<90%)     |
| 50.00 | UDINE-AZ OSP UNI | 4.00  | M |        | ASTRO II                  | TEMPORAL           | TEMPORAL           | YES | PARTIAL RESECTION (<90%)     |
| 51.00 | UDINE-AZ OSP UNI | 3.00  | M | 100.00 | ASTRO II                  | HYPOTHALAMIC OP    | HYPOTHALAMIC OP    | YES | GROSS TOTAL RESECTION (>90%) |
| 52.00 | GENOVA           | 13.00 | F | 90.00  | OTHER (ATIPIC MENINGIOMI) | TEMPORAL           | TEMPORAL           | YES | GROSS TOTAL RESECTION (>90%) |
| 53.00 | GENOVA           | 7.00  | F | 70.00  | OTHER (ATIPIC MENINGIOMI) | BILATERAL          | MULTICENTRIC       | NO  |                              |
| 54.00 | GENOVA           | 22.00 | F | 90.00  | OTHER (ATIPIC MENINGIOMI) | FRONTAL            | FRONTAL            | YES | GROSS TOTAL RESECTION (>90%) |
| 55.00 | GENOVA           | 3.00  | M | 90.00  | OTHER (ATIPIC MENINGIOMI) | BILATERAL          | MULTICENTRIC       | YES | GROSS TOTAL RESECTION (>90%) |
| 56.00 | GENOVA           | 13.00 | F | 80.00  | OTHER (ATIPIC MENINGIOMI) | TEMPORAL           | TEMPORAL           | YES | GROSS TOTAL RESECTION (>90%) |
| 57.00 | GENOVA           | 13.00 | F | 90.00  | OTHER (ATIPIC MENINGIOMI) | FRONTAL            | FRONTAL            | YES | GROSS TOTAL RESECTION (>90%) |
| 58.00 | GENOVA           | 3.00  | F | 60.00  | OTHER (ATIPIC MENINGIOMI) | BILATERAL          | MULTICENTRIC       | YES | PARTIAL RESECTION (<90%)     |
| 59.00 | GENOVA           | 10.00 | F | 80.00  | OTHER (ATIPIC MENINGIOMI) | TEMPORAL           | TEMPORAL           | YES | PARTIAL RESECTION (<90%)     |
| 60.00 | L'AQUILA         | 48.00 | M | 100.00 | OLIGODENDROGLIOMA II      | FRONTAL            | FRONTAL            | YES | GROSS TOTAL RESECTION (>90%) |
| 61.00 | L'AQUILA         | 38.00 | M | 90.00  | OLIGODENDROGLIOMA II      | FRONTAL+TEMPORAL   | FRONTAL+TEMPORAL   | YES | PARTIAL RESECTION (<90%)     |
| 62.00 | L'AQUILA         | 48.00 | M | 80.00  | OLIGOASTROCITOMA III      | FRONTAL+TEMPORAL   | FRONTAL+TEMPORAL   | YES | GROSS TOTAL RESECTION (>90%) |
| 63.00 | L'AQUILA         | 55.00 | F | 80.00  | GBM                       | FRONTAL+INSULA     | FRONTAL+INSULA     | YES | PARTIAL RESECTION (<90%)     |
| 64.00 | L'AQUILA         | 52.00 | M | 60.00  | OLIGOASTROCITOMA III      | FRONTAL+PARIETAL   | FRONTAL+PARIETAL   | YES | PARTIAL RESECTION (<90%)     |
| 65.00 | L'AQUILA         | 74.00 | M | 70.00  | GBM                       | TEMPORAL+PARIETAL  | TEMPORAL+PARIETAL  | YES | PARTIAL RESECTION (<90%)     |
| 66.00 | L'AQUILA         | 55.00 | F | 100.00 | OLIGODENDROGLIOMA III     | FRONTAL+INSULA     | FRONTAL+INSULA     | YES | GROSS TOTAL RESECTION (>90%) |
| 67.00 | L'AQUILA         | 47.00 | F | 30.00  | METASTASES                | MULTICENTRIC       | MULTICENTRIC       | NO  |                              |
| 68.00 | L'AQUILA         | 53.00 | M | 70.00  | GBM                       | FRONTAL            | FRONTAL            | YES | PARTIAL RESECTION (<90%)     |
| 69.00 | L'AQUILA         | 64.00 | M | 80.00  | METASTASES                | FRONTAL+PARIETAL   | FRONTAL+PARIETAL   | NO  |                              |
| 70.00 | L'AQUILA         | 73.00 | F | 40.00  | METASTASES                | TEMPORAL+PARIETAL  | TEMPORAL+PARIETAL  | NO  |                              |
| 71.00 | L'AQUILA         | 57.00 | M | 100.00 | GBM                       | FRONTAL            | FRONTAL            | YES | GROSS TOTAL RESECTION (>90%) |
| 72.00 | L'AQUILA         | 64.00 | F | 80.00  | GBM                       | TEMPORAL           | TEMPORAL           | YES | PARTIAL RESECTION (<90%)     |
| 73.00 | L'AQUILA         | 79.00 | M | 50.00  | METASTASES                | MULTICENTRIC       | MULTICENTRIC       | NO  |                              |
| 74.00 | L'AQUILA         | 56.00 | F | 70.00  | METASTASES                | TEMPORAL+INSULA    | TEMPORAL+INSULA    | YES | GROSS TOTAL RESECTION (>90%) |
| 75.00 | L'AQUILA         | 48.00 | M | 60.00  | METASTASES                | MULTICENTRIC       | MULTICENTRIC       | NO  |                              |
| 76.00 | L'AQUILA         | 37.00 | M | 60.00  | ASTROC III+GBM            | PARIETAL+OCCIPITAL | PARIETAL+OCCIPITAL | YES | GROSS TOTAL RESECTION (>90%) |
| 77.00 | L'AQUILA         | 66.00 | F | 90.00  | METASTASES                | FRONTAL+TEMPORAL   | FRONTAL+TEMPORAL   | NO  |                              |
| 78.00 | L'AQUILA         | 67.00 | F | 90.00  | OLIGODENDROGLIOMA II      | FRONTAL+INSULA     | FRONTAL+INSULA     | YES | PARTIAL RESECTION (<90%)     |
| 79.00 | L'AQUILA         | 59.00 | F | 80.00  | METASTASES                | CEREBELLAR         | CEREBELLAR         | NO  |                              |
| 80.00 | L'AQUILA         | 35.00 | F | 100.00 | OTHER (ATIPIC MENINGIOMI) | CEREBELLAR         | CEREBELLAR         | YES | GROSS TOTAL RESECTION (>90%) |
| 81.00 | L'AQUILA         | 52.00 | F | 70.00  | METASTASES                | TEMPORAL+PARIETAL  | TEMPORAL+PARIETAL  | YES | PARTIAL RESECTION (<90%)     |

|        |          |       |   |        |                           |                     |                     |     |                              |
|--------|----------|-------|---|--------|---------------------------|---------------------|---------------------|-----|------------------------------|
| 82.00  | L'AQUILA | 52.00 | F | 70.00  | METASTASES                | MULTICENTRIC        | MULTICENTRIC        | NO  |                              |
| 83.00  | L'AQUILA | 70.00 | F | 70.00  | METASTASES                | MULTICENTRIC        | MULTICENTRIC        | NO  |                              |
| 84.00  | L'AQUILA | 82.00 | M | 70.00  | GBM                       | FRONTAL+TEMPORAL    | FRONTAL+TEMPORAL    | YES | GROSS TOTAL RESECTION (>90%) |
| 85.00  | L'AQUILA | 39.00 | F | 100.00 | ASTRO II                  | FRONTAL             | FRONTAL             | YES | GROSS TOTAL RESECTION (>90%) |
| 86.00  | L'AQUILA | 61.00 | M | 90.00  | GBM                       | TEMPORAL+PARIETAL   | TEMPORAL+PARIETAL   | YES | PARTIAL RESECTION (<90%)     |
| 87.00  | L'AQUILA | 48.00 | M | 80.00  | GBM                       | PARIETAL+OCCIPITAL  | PARIETAL+OCCIPITAL  | YES | GROSS TOTAL RESECTION (>90%) |
| 88.00  | L'AQUILA | 60.00 | M | 100.00 | OLIGODENDROGLIOMA II      | FRONTAL             | FRONTAL             | YES | GROSS TOTAL RESECTION (>90%) |
| 89.00  | L'AQUILA | 64.00 | F | 60.00  | METASTASES                | TEMPORAL+INSULA     | TEMPORAL+INSULA     | NO  |                              |
| 90.00  | L'AQUILA | 71.00 | M | 70.00  | METASTASES                | TEMPORAL+OCCIPITAL  | TEMPORAL+OCCIPITAL  | NO  |                              |
| 91.00  | L'AQUILA | 33.00 | F | 100.00 | ASTRO III                 | TEMPORAL            | TEMPORAL            | YES | PARTIAL RESECTION (<90%)     |
| 92.00  | L'AQUILA | 63.00 | M | 90.00  | GBM                       | TEMPORAL            | TEMPORAL            | YES | GROSS TOTAL RESECTION (>90%) |
| 93.00  | L'AQUILA | 58.00 | M | 100.00 | OTHER (ATIPIC MENINGIOMI) | PARIETAL            | PARIETAL            | YES | GROSS TOTAL RESECTION (>90%) |
| 94.00  | L'AQUILA | 31.00 | M | 80.00  | ASTRO III                 | MULTICENTRIC        | MULTICENTRIC        | YES | PARTIAL RESECTION (<90%)     |
| 95.00  | L'AQUILA | 79.00 | F | 60.00  | GBM                       |                     |                     | YES | GROSS TOTAL RESECTION (>90%) |
| 96.00  | L'AQUILA | 53.00 | M | 80.00  | METASTASES                | PARIETAL+CEREBELLUM | PARIETAL+CEREBELLUM | NO  |                              |
| 97.00  | NUORO    | 75.00 | M |        | GBM                       | TEMPORAL            | TEMPORAL            | NO  |                              |
| 98.00  | NUORO    | 58.00 | F |        | OLIGODENDROGLIOMA III     | TEMPORAL            | TEMPORAL            | YES | GROSS TOTAL RESECTION (>90%) |
| 99.00  | NUORO    | 68.00 | F |        | GBM                       | PARIETAL            | PARIETAL            | YES | GROSS TOTAL RESECTION (>90%) |
| 100.00 | NUORO    | 72.00 | F | 90.00  | OTHER (ATIPIC MENINGIOMI) | TEMPORAL            | TEMPORAL            | YES | GROSS TOTAL RESECTION (>90%) |
| 101.00 | NUORO    | 51.00 | F | 60.00  | OTHER (ATIPIC MENINGIOMI) | MULTICENTRIC        | MULTICENTRIC        | YES | GROSS TOTAL RESECTION (>90%) |
| 102.00 | NUORO    | 48.00 | F | 100.00 | OTHER (ATIPIC MENINGIOMI) | TEMPORAL            | TEMPORAL            | NO  |                              |
| 103.00 | NUORO    | 55.00 | M |        | ASTRO II                  | FRONTAL             | FRONTAL             | YES | PARTIAL RESECTION (<90%)     |
| 104.00 | NUORO    | 43.00 | F |        | GBM                       | TEMPORAL            | TEMPORAL            | YES | GROSS TOTAL RESECTION (>90%) |
| 105.00 | NUORO    | 51.00 | F |        | ASTRO II +GBM             | FRONTAL             | FRONTAL             | YES | GROSS TOTAL RESECTION (>90%) |
| 106.00 | PADOVA   | 44.00 | M |        | GBM                       | TEMPORAL            | TEMPORAL            | YES | GROSS TOTAL RESECTION (>90%) |
| 107.00 | PADOVA   | 44.00 | M |        | GBM                       | TEMPORAL            | TEMPORAL            | YES | GROSS TOTAL RESECTION (>90%) |
| 108.00 | PADOVA   | 44.00 | F |        | GBM                       | PARIETAL            | PARIETAL            | YES | GROSS TOTAL RESECTION (>90%) |
| 109.00 | PADOVA   | 22.00 | M |        | ASTRO II                  | TEMPORAL            | TEMPORAL            | YES | GROSS TOTAL RESECTION (>90%) |
| 110.00 | PALERMO  | 51.00 | M | 70.00  | OTHER (ATIPIC MENINGIOMI) | FRONTAL             | FRONTAL             | YES | GROSS TOTAL RESECTION (>90%) |
| 111.00 | PALERMO  | 40.00 | M | 40.00  | GBM                       | TEMPORAL            | TEMPORAL            | YES | GROSS TOTAL RESECTION (>90%) |
| 112.00 | PALERMO  | 66.00 | M | 50.00  | METASTASES                | PARIETAL            | PARIETAL            | NO  |                              |
| 113.00 | PALERMO  | 59.00 | M | 40.00  | GBM                       | FRONTAL             | FRONTAL             | YES | GROSS TOTAL RESECTION (>90%) |
| 114.00 | PALERMO  | 35.00 | F | 50.00  | METASTASES                |                     |                     | NO  |                              |
| 115.00 | PALERMO  | 53.00 | F | 80.00  | OTHER (ATIPIC MENINGIOMI) |                     |                     | NO  |                              |
| 116.00 | PALERMO  | 51.00 | M | 90.00  | OTHER (ATIPIC MENINGIOMI) | PARIETAL            | PARIETAL            | YES | GROSS TOTAL RESECTION (>90%) |
| 117.00 | PALERMO  | 25.00 | F | 90.00  | ASTRO II                  | FRONTAL             | FRONTAL             | NO  |                              |
| 118.00 | PALERMO  | 29.00 | F | 40.00  | OLIGOASTROCYTOMA III      | FRONTAL             | FRONTAL             | YES | GROSS TOTAL RESECTION (>90%) |
| 119.00 | PALERMO  | 48.00 | M | 40.00  | ASTRO III                 | MULTICENTRIC        | MULTICENTRIC        | YES | GROSS TOTAL RESECTION (>90%) |
| 120.00 | PALERMO  | 23.00 | F | 80.00  | OTHER (ATIPIC MENINGIOMI) | BILATERAL           | MULTICENTRIC        | YES | GROSS TOTAL RESECTION (>90%) |
| 121.00 | PERUGIA  | 80.00 | F | 60.00  | GBM                       | MULTICENTRIC        | MULTICENTRIC        | YES | PARTIAL RESECTION (<90%)     |
| 122.00 | PERUGIA  | 48.00 | F | 70.00  | ASTRO II                  | MULTILOBULAR        | MULTICENTRIC        | YES | PARTIAL RESECTION (<90%)     |
| 123.00 | PERUGIA  | 58.00 | M | 50.00  | GBM                       | FRONTAL             | FRONTAL             | YES | GROSS TOTAL RESECTION (>90%) |

|        |         |       |   |        |                           |              |              |     |                            |
|--------|---------|-------|---|--------|---------------------------|--------------|--------------|-----|----------------------------|
| 124.00 | PERUGIA | 57.00 | F | 80.00  | METASTASES                | BILATERAL    | MULTICENTRIC | NO  |                            |
| 125.00 | PERUGIA | 55.00 | M | 100.00 | GBM                       | TEMPORAL     | TEMPORAL     | YES | GROSS TOTAL RESECTION (>90 |
| 126.00 | PERUGIA | 63.00 | F | 60.00  | OLIGODENDROGLIOMA II      | MULTILOBULAR | MULTICENTRIC | YES | PARTIAL RESECTION (<90%)   |
| 127.00 | PERUGIA | 43.00 | F | 100.00 | OTHER (ATIPIC MENINGIOMI) | FRONTAL      | FRONTAL      | YES | GROSS TOTAL RESECTION (>90 |
| 128.00 | PERUGIA | 59.00 | M | 90.00  | GBM                       | TEMPORAL     | TEMPORAL     | YES | GROSS TOTAL RESECTION (>90 |
| 129.00 | PERUGIA | 35.00 | F | 100.00 | OTHER (ATIPIC MENINGIOMI) | FRONTAL      | FRONTAL      | YES | PARTIAL RESECTION (<90%)   |
| 130.00 | PERUGIA | 70.00 | M | 80.00  | GBM                       | MULTILOBULAR | MULTICENTRIC | YES | BIOPSY                     |
| 131.00 | PERUGIA | 33.00 | M | 80.00  | ASTRO II                  | INSULA       | INSULA       | YES | GROSS TOTAL RESECTION (>90 |
| 132.00 | PERUGIA | 69.00 | F | 80.00  | GBM                       | MULTILOBULAR | MULTICENTRIC | YES | GROSS TOTAL RESECTION (>90 |
| 133.00 | PERUGIA | 66.00 | M | 80.00  | METASTASES                | MULTILOBULAR | MULTICENTRIC | YES | GROSS TOTAL RESECTION (>90 |
| 134.00 | PERUGIA | 78.00 | M | 70.00  | METASTASES                | OCCIPITAL    | OCCIPITAL    | YES | GROSS TOTAL RESECTION (>90 |
| 135.00 | PERUGIA | 61.00 | F | 100.00 | OTHER (ATIPIC MENINGIOMI) | MULTILOBULAR | MULTICENTRIC | YES | GROSS TOTAL RESECTION (>90 |
| 136.00 | PERUGIA | 64.00 | M | 100.00 | GBM                       | MULTILOBULAR | MULTICENTRIC | YES | GROSS TOTAL RESECTION (>90 |
| 137.00 | PERUGIA | 52.00 | M | 100.00 | OLIGODENDROGLIOMA II      | FRONTAL      | FRONTAL      | YES | PARTIAL RESECTION (<90%)   |
| 138.00 | PERUGIA | 38.00 | M | 90.00  | GBM                       | FRONTAL      | FRONTAL      | YES | GROSS TOTAL RESECTION (>90 |
| 139.00 | PERUGIA | 54.00 | M | 80.00  | GBM                       | FRONTAL      | FRONTAL      | YES | GROSS TOTAL RESECTION (>90 |
| 140.00 | PERUGIA | 56.00 | F | 100.00 | OTHER (ATIPIC MENINGIOMI) | MULTILOBULAR | MULTICENTRIC | YES | GROSS TOTAL RESECTION (>90 |
| 141.00 | PERUGIA | 41.00 | M | 90.00  | OTHER (ATIPIC MENINGIOMI) | MULTILOBULAR | MULTICENTRIC | YES | GROSS TOTAL RESECTION (>90 |
| 142.00 | PERUGIA | 63.00 | M | 80.00  | GBM                       | PARIETAL     | PARIETAL     | YES | GROSS TOTAL RESECTION (>90 |
| 143.00 | PERUGIA | 57.00 | M | 70.00  | GBM                       | MULTILOBULAR | MULTICENTRIC | YES | GROSS TOTAL RESECTION (>90 |
| 144.00 | PERUGIA | 31.00 | M | 40.00  | OLIGOASTROCITOMA II       | MULTILOBULAR | MULTICENTRIC | YES | GROSS TOTAL RESECTION (>90 |
| 145.00 | PERUGIA | 59.00 | M | 70.00  | GBM                       | MULTILOBULAR | MULTICENTRIC | YES | GROSS TOTAL RESECTION (>90 |
| 146.00 | PERUGIA | 76.00 | F | 100.00 | OTHER (ATIPIC MENINGIOMI) | PARIETAL     | PARIETAL     | YES | GROSS TOTAL RESECTION (>90 |
| 147.00 | PERUGIA | 67.00 | M | 60.00  | OLIGODENDROGLIOMA III     | TEMPORAL     | TEMPORAL     | YES | PARTIAL RESECTION (<90%)   |
| 148.00 | PERUGIA | 49.00 | M | 100.00 | OTHER (ATIPIC MENINGIOMI) | FRONTAL      | FRONTAL      | YES | GROSS TOTAL RESECTION (>90 |
| 149.00 | PERUGIA | 52.00 | M | 90.00  | METASTASES                | MULTILOBULAR | MULTICENTRIC | NO  |                            |
| 150.00 | PERUGIA | 41.00 | F | 60.00  | OTHER (ATIPIC MENINGIOMI) | FRONTAL      | FRONTAL      | YES | GROSS TOTAL RESECTION (>90 |
| 151.00 | PERUGIA | 48.00 | F | 80.00  | OLIGOASTROCITOMA III      | FRONTAL      | FRONTAL      | YES | PARTIAL RESECTION (<90%)   |
| 152.00 | PERUGIA | 47.00 | F | 80.00  | OLIGOASTROCITOMA III      | FRONTAL      | FRONTAL      | YES | GROSS TOTAL RESECTION (>90 |
| 153.00 | PERUGIA | 48.00 | F | 70.00  | GBM                       | MULTILOBULAR | MULTICENTRIC | YES | GROSS TOTAL RESECTION (>90 |
| 154.00 | PERUGIA | 70.00 | M | 60.00  | GBM                       | FRONTAL      | FRONTAL      | YES | GROSS TOTAL RESECTION (>90 |
| 155.00 | PERUGIA | 45.00 | M | 70.00  | GBM                       | FRONTAL      | FRONTAL      | YES | GROSS TOTAL RESECTION (>90 |
| 156.00 | PERUGIA | 45.00 | F | 90.00  | OLIGOASTROCITOMA III      | FRONTAL      | FRONTAL      | YES | GROSS TOTAL RESECTION (>90 |
| 157.00 | PERUGIA | 61.00 | F | 60.00  | OLIGODENDROGLIOMA II      | MULTILOBULAR | MULTICENTRIC | YES | GROSS TOTAL RESECTION (>90 |
| 158.00 | PERUGIA | 53.00 | F | 90.00  | METASTASES                | MULTICENTRIC | MULTICENTRIC | NO  |                            |
| 159.00 | PERUGIA | 72.00 | M | 90.00  | ASTROC III                | PARIETAL     | PARIETAL     | YES | GROSS TOTAL RESECTION (>90 |
| 160.00 | PERUGIA | 37.00 | F | 100.00 | OLIGODENDROGLIOMA II      | MULTILOBULAR | MULTICENTRIC | YES | GROSS TOTAL RESECTION (>90 |
| 161.00 | PERUGIA | 73.00 | M | 60.00  | OLIGODENDROGLIOMA II      | INSULA       | INSULA       | NO  |                            |
| 162.00 | PERUGIA | 72.00 | M | 70.00  | GBM                       | FRONTAL      | FRONTAL      | YES | GROSS TOTAL RESECTION (>90 |
| 163.00 | PERUGIA | 50.00 | M | 70.00  | OLIGODENDROGLIOMA III     | MULTILOBULAR | MULTICENTRIC | YES | BIOPSY                     |
| 164.00 | PERUGIA | 55.00 | M | 80.00  | OLIGODENDROGLIOMA II      | TEMPORAL     | TEMPORAL     | YES | GROSS TOTAL RESECTION (>90 |
| 165.00 | PERUGIA | 55.00 | M | 70.00  | OLIGODENDROGLIOMA II      | MULTILOBULAR | MULTICENTRIC | YES | GROSS TOTAL RESECTION (>90 |

|        |                 |       |   |        |                           |                  |                  |     |                             |
|--------|-----------------|-------|---|--------|---------------------------|------------------|------------------|-----|-----------------------------|
| 166.00 | PERUGIA         | 78.00 | M | 60.00  | GBM                       | MULTICENTRIC     | MULTICENTRIC     | NO  |                             |
| 167.00 | PERUGIA         | 50.00 | M | 70.00  | GBM                       | MULTILOBULAR     | MULTICENTRIC     | YES | PARTIAL RESECTION (<90%)    |
| 168.00 | PERUGIA         | 70.00 | M | 60.00  | GBM                       | TEMPORAL         | TEMPORAL         | YES | GROSS TOTAL RESECTION (>90) |
| 169.00 | PERUGIA         | 40.00 | F | 50.00  | METASTASES                | MULTICENTRIC     | MULTICENTRIC     | YES | PARTIAL RESECTION (<90%)    |
| 170.00 | PERUGIA         | 44.00 | F | 50.00  | GBM                       | BILATERAL        | MULTICENTRIC     | YES | BIOPSY                      |
| 171.00 | PERUGIA         | 45.00 | F | 100.00 | OLIGODENDROGLIOMA II      | BILATERAL        | MULTICENTRIC     | YES | PARTIAL RESECTION (<90%)    |
| 172.00 | PERUGIA         | 59.00 | F | 90.00  | OTHER (ATIPIC MENINGIOMI) | PARIETAL         | PARIETAL         | YES | GROSS TOTAL RESECTION (>90) |
| 173.00 | PERUGIA         | 29.00 | M | 90.00  | OLIGODENDROGLIOMA III     | FRONTAL          | FRONTAL          | YES | GROSS TOTAL RESECTION (>90) |
| 174.00 | PERUGIA         | 53.00 | M | 100.00 | OTHER (ATIPIC MENINGIOMI) | FRONTAL          | FRONTAL          | YES | GROSS TOTAL RESECTION (>90) |
| 175.00 | PERUGIA         | 56.00 | F | 80.00  | GBM                       | MULTICENTRIC     | MULTICENTRIC     | YES | PARTIAL RESECTION (<90%)    |
| 176.00 | PERUGIA         | 56.00 | M | 100.00 | GBM                       | FRONTAL          | FRONTAL          | YES | GROSS TOTAL RESECTION (>90) |
| 177.00 | PERUGIA         | 58.00 | M | 70.00  | METASTASES                | BILATERAL        | MULTICENTRIC     | NO  |                             |
| 178.00 | REGGIO CALABRIA | 39.00 | F | 40.00  | OTHER (ATIPIC MENINGIOMI) | MULTILOBULAR     | MULTICENTRIC     | YES | PARTIAL RESECTION (<90%)    |
| 179.00 | REGGIO CALABRIA | 68.00 | M | 90.00  | METASTASES                | PARIETAL         | PARIETAL         | NO  |                             |
| 180.00 | REGGIO CALABRIA | 65.00 | M | 90.00  | GBM                       | TEMPORAL         | TEMPORAL         | YES | GROSS TOTAL RESECTION (>90) |
| 181.00 | REGGIO CALABRIA | 61.00 | M | 90.00  | METASTASES                | MULTILOBULAR     | MULTICENTRIC     | NO  |                             |
| 182.00 | REGGIO CALABRIA | 80.00 | F | 30.00  | ASTRO II                  | BILATERAL        | MULTICENTRIC     | YES | BIOPSY                      |
| 183.00 | REGGIO CALABRIA | 68.00 | F | 90.00  | GBM                       | MULTILOBULAR     | MULTICENTRIC     | YES | GROSS TOTAL RESECTION (>90) |
| 184.00 | REGGIO CALABRIA | 83.00 | F | 40.00  | METASTASES                | FRONTAL          | FRONTAL          | NO  |                             |
| 185.00 | REGGIO CALABRIA | 62.00 | M | 50.00  | ASTRO II                  | MULTILOBULAR     | MULTICENTRIC     | YES | GROSS TOTAL RESECTION (>90) |
| 186.00 | REGGIO CALABRIA | 46.00 | M | 100.00 |                           | TEMPORAL         | TEMPORAL         | YES | PARTIAL RESECTION (<90%)    |
| 187.00 | REGGIO CALABRIA | 71.00 | M | 20.00  | METASTASES                | MULTICENTRIC     | MULTICENTRIC     | NO  |                             |
| 188.00 | REGGIO CALABRIA | 39.00 | M | 90.00  | GBM                       | TEMPORAL         | TEMPORAL         | YES | PARTIAL RESECTION (<90%)    |
| 189.00 | REGGIO CALABRIA | 33.00 | M | 90.00  | ASTROC III                | MULTILOBULAR     | MULTICENTRIC     | YES | GROSS TOTAL RESECTION (>90) |
| 190.00 | REGGIO CALABRIA | 43.00 | M | 100.00 | ASTRO II                  | MULTILOBULAR     | MULTICENTRIC     | YES | PARTIAL RESECTION (<90%)    |
| 191.00 | REGGIO CALABRIA | 28.00 | M | 100.00 | OLIGODENDROGLIOMA III     | TEMPORAL         | TEMPORAL         | YES | GROSS TOTAL RESECTION (>90) |
| 192.00 | REGGIO CALABRIA | 65.00 | M | 70.00  | GBM                       | PARIETAL         | PARIETAL         | YES |                             |
| 193.00 | OPBG            | 19.00 | M | 90.00  | GBM                       | FRONTAL+PARIETAL | FRONTAL+PARIETAL | YES | BIOPSY                      |
| 194.00 | OPBG            | 1.50  | F | 100.00 | GBM                       | FRONTAL          | FRONTAL          | YES | GROSS TOTAL RESECTION (>90) |
| 195.00 | OPBG            | 13.00 | F | 100.00 | ASTRO II                  | TEMPORAL         | TEMPORAL         | YES | GROSS TOTAL RESECTION (>90) |
| 196.00 | OPBG            | 3.50  | F | 100.00 | OTHER (ATIPIC MENINGIOMI) | FRONTAL+INSULA   | FRONTAL+INSULA   | YES | GROSS TOTAL RESECTION (>90) |
| 197.00 | OPBG            | 0.60  | F | 100.00 | ASTRO II                  | TEMPORAL         | TEMPORAL         | YES | PARTIAL RESECTION (<90%)    |
| 198.00 | OPBG            | 1.00  | M | 60.00  | OTHER (ATIPIC MENINGIOMI) | MULTILOBULAR     | MULTILOBULAR     | YES | BIOPSY                      |
| 199.00 | OPBG            | 11.00 | M | 100.00 | OTHER (ATIPIC MENINGIOMI) | FRONTAL          | FRONTAL          | YES | GROSS TOTAL RESECTION (>90) |
| 200.00 | ROMA-IRE        | 28.00 | M | 90.00  | OLIGODENDROGLIOMA III     | FRONTAL          | FRONTAL          | YES | PARTIAL RESECTION (<90%)    |
| 201.00 | ROMA-IRE        | 50.00 | M | 90.00  | GBM                       | FRONTAL          | FRONTAL          | NO  |                             |
| 202.00 | ROMA-IRE        | 68.00 | F | 100.00 | OTHER (ATIPIC MENINGIOMI) | FRONTAL          | FRONTAL          | YES | GROSS TOTAL RESECTION (>90) |
| 203.00 | ROMA-IRE        | 66.00 | F | 100.00 | OTHER (ATIPIC MENINGIOMI) | FRONTAL          | FRONTAL          | NO  |                             |
| 204.00 | ROMA-IRE        | 55.00 | F | 100.00 | OTHER (ATIPIC MENINGIOMI) | FRONTAL          | FRONTAL          | YES | GROSS TOTAL RESECTION (>90) |
| 205.00 | ROMA-IRE        | 36.00 | M | 90.00  | OTHER (ATIPIC MENINGIOMI) | FRONTAL          | FRONTAL          | YES | GROSS TOTAL RESECTION (>90) |
| 206.00 | ROMA-IRE        | 67.00 | F | 100.00 | ASTRO II                  | FRONTAL          | FRONTAL          | YES | PARTIAL RESECTION (<90%)    |
| 207.00 | ROMA-IRE        | 47.00 | F | 100.00 | OLIGODENDROGLIOMA II      | FRONTAL          | FRONTAL          | YES | GROSS TOTAL RESECTION (>90) |

|        |          |       |   |        |                           |                   |                   |     |                            |
|--------|----------|-------|---|--------|---------------------------|-------------------|-------------------|-----|----------------------------|
| 208.00 | ROMA-IRE | 21.00 | F | 100.00 | ASTRO II                  | FRONTAL           | FRONTAL           | YES | GROSS TOTAL RESECTION (>90 |
| 209.00 | ROMA-IRE | 54.00 | F | 100.00 | OLIGODENDROGLIOMA II      | FRONTAL           | FRONTAL           | YES | GROSS TOTAL RESECTION (>90 |
| 210.00 | ROMA-IRE | 63.00 | M | 80.00  | GBM                       | FRONTAL           | FRONTAL           | YES | BIOPSY                     |
| 211.00 | ROMA-IRE | 41.00 | M | 100.00 | OLIGODENDROGLIOMA II      | FRONTAL           | FRONTAL           | YES | BIOPSY                     |
| 212.00 | ROMA-IRE | 60.00 | F | 100.00 | OTHER (ATIPIC MENINGIOMI) | FRONTAL           | FRONTAL           | YES | BIOPSY                     |
| 213.00 | ROMA-IRE | 42.00 | F | 100.00 | OTHER (ATIPIC MENINGIOMI) | FRONTAL           | FRONTAL           | YES | GROSS TOTAL RESECTION (>90 |
| 214.00 | ROMA-IRE | 70.00 | M | 100.00 | OTHER (ATIPIC MENINGIOMI) | FRONTAL           | FRONTAL           | YES | GROSS TOTAL RESECTION (>90 |
| 215.00 | ROMA-IRE | 61.00 | F | 100.00 | OTHER (ATIPIC MENINGIOMI) | FRONTAL           | FRONTAL           | YES | GROSS TOTAL RESECTION (>90 |
| 216.00 | ROMA-IRE | 70.00 | F | 50.00  | OLIGODENDROGLIOMA III     | FRONTAL           | FRONTAL           | YES | GROSS TOTAL RESECTION (>90 |
| 217.00 | ROMA-IRE | 70.00 | F | 100.00 | OTHER (ATIPIC MENINGIOMI) | FRONTAL           | FRONTAL           | YES | GROSS TOTAL RESECTION (>90 |
| 218.00 | ROMA-IRE | 33.00 | M | 70.00  | OLIGOASTROCITOMA II       | FRONTAL           | FRONTAL           | YES | GROSS TOTAL RESECTION (>90 |
| 219.00 | ROMA-IRE | 65.00 | M | 100.00 | GBM                       | FRONTAL           | FRONTAL           | NO  |                            |
| 220.00 | ROMA-IRE | 50.00 | F | 100.00 | GBM                       | FRONTAL           | FRONTAL           | YES | GROSS TOTAL RESECTION (>90 |
| 221.00 | ROMA-IRE | 23.00 | M | 100.00 | GBM                       | FRONTAL           | FRONTAL           | YES | PARTIAL RESECTION (<90%)   |
| 222.00 | ROMA-IRE | 49.00 | F | 100.00 | OTHER (ATIPIC MENINGIOMI) | FRONTAL           | FRONTAL           | YES | GROSS TOTAL RESECTION (>90 |
| 223.00 | ROMA-IRE | 40.00 | M | 100.00 | ASTROC III                | FRONTAL           | FRONTAL           | NO  |                            |
| 224.00 | ROMA-IRE | 20.00 | F | 100.00 | ASTROC III                | FRONTAL+TEMPORAL  | FRONTAL+TEMPORAL  | YES | BIOPSY                     |
| 225.00 | ROMA-IRE | 44.00 | M | 80.00  | OLIGOASTROCITOMA III      | FRONTAL+TEMPORAL  | FRONTAL+TEMPORAL  | YES | PARTIAL RESECTION (<90%)   |
| 226.00 | ROMA-IRE | 51.00 | F | 100.00 | OLIGOASTROCITOMA II       | FRONTAL+TEMPORAL  | FRONTAL+TEMPORAL  | YES | BIOPSY                     |
| 227.00 | ROMA-IRE | 65.00 | F | 100.00 | OLIGOASTROCITOMA II       | FRONTAL+PARIETAL  | FRONTAL+PARIETAL  | YES | GROSS TOTAL RESECTION (>90 |
| 228.00 | ROMA-IRE | 55.00 | F | 80.00  | OLIGODENDROGLIOMA II      | FRONTAL+PARIETAL  | FRONTAL+PARIETAL  | YES | PARTIAL RESECTION (<90%)   |
| 229.00 | ROMA-IRE | 67.00 | F | 70.00  | OTHER (ATIPIC MENINGIOMI) | FRONTAL+PARIETAL  | FRONTAL+PARIETAL  | YES | GROSS TOTAL RESECTION (>90 |
| 230.00 | ROMA-IRE | 45.00 | F | 100.00 | OLIGODENDROGLIOMA III     | FRONTAL+PARIETAL  | FRONTAL+PARIETAL  | YES | GROSS TOTAL RESECTION (>90 |
| 231.00 | ROMA-IRE | 47.00 | F | 100.00 | OLIGOASTROCITOMA III      | FRONTAL+PARIETAL  | FRONTAL+PARIETAL  | YES | GROSS TOTAL RESECTION (>90 |
| 232.00 | ROMA-IRE | 56.00 | M | 100.00 | OLIGODENDROGLIOMA II      | FRONTAL+PARIETAL  | FRONTAL+PARIETAL  | YES | BIOPSY                     |
| 233.00 | ROMA-IRE | 34.00 | F | 100.00 | ASTRO II                  | FRONTAL+PARIETAL  | FRONTAL+PARIETAL  | YES | PARTIAL RESECTION (<90%)   |
| 234.00 | ROMA-IRE | 51.00 | F | 70.00  | ASTRO II                  | FRONTAL+PARIETAL  | FRONTAL+PARIETAL  | YES | BIOPSY                     |
| 235.00 | ROMA-IRE | 56.00 | M | 100.00 | OTHER (ATIPIC MENINGIOMI) | FRONTAL+PARIETAL  | FRONTAL+PARIETAL  | YES | GROSS TOTAL RESECTION (>90 |
| 236.00 | ROMA-IRE | 25.00 | F | 100.00 | OTHER (ATIPIC MENINGIOMI) | FRONTAL+OCCIPITAL | FRONTAL+OCCIPITAL | YES | PARTIAL RESECTION (<90%)   |
| 237.00 | ROMA-IRE | 23.00 | M | 100.00 | ASTRO II                  | TEMPORAL          | TEMPORAL          | NO  |                            |
| 238.00 | ROMA-IRE | 51.00 | M | 80.00  | OLIGODENDROGLIOMA II      | TEMPORAL          | TEMPORAL          | YES | PARTIAL RESECTION (<90%)   |
| 239.00 | ROMA-IRE | 66.00 | F | 100.00 | OTHER (ATIPIC MENINGIOMI) | TEMPORAL          | TEMPORAL          | YES | GROSS TOTAL RESECTION (>90 |
| 240.00 | ROMA-IRE | 43.00 | F | 100.00 | ASTROC III                | TEMPORAL          | TEMPORAL          | YES | GROSS TOTAL RESECTION (>90 |
| 241.00 | ROMA-IRE | 51.00 | F | 90.00  | OTHER (ATIPIC MENINGIOMI) | TEMPORAL          | TEMPORAL          | YES | GROSS TOTAL RESECTION (>90 |
| 242.00 | ROMA-IRE | 68.00 | F | 100.00 | GBM                       | TEMPORAL          | TEMPORAL          | YES | PARTIAL RESECTION (<90%)   |
| 243.00 | ROMA-IRE | 39.00 | M | 100.00 | OLIGOASTROCITOMA II       | TEMPORAL          | TEMPORAL          | YES | GROSS TOTAL RESECTION (>90 |
| 244.00 | ROMA-IRE | 47.00 | F | 80.00  | OLIGOASTROCITOMA III      | TEMPORAL          | TEMPORAL          | YES | GROSS TOTAL RESECTION (>90 |
| 245.00 | ROMA-IRE | 71.00 | F | 100.00 | OTHER (ATIPIC MENINGIOMI) | TEMPORAL          | TEMPORAL          | YES | GROSS TOTAL RESECTION (>90 |
| 246.00 | ROMA-IRE | 47.00 | M | 100.00 | ASTRO II                  | TEMPORAL          | TEMPORAL          | NO  |                            |
| 247.00 | ROMA-IRE | 50.00 | M | 70.00  | OTHER (ATIPIC MENINGIOMI) | TEMPORAL          | TEMPORAL          | YES | GROSS TOTAL RESECTION (>90 |
| 248.00 | ROMA-IRE | 35.00 | M | 100.00 | OLIGODENDROGLIOMA III     | TEMPORAL          | TEMPORAL          | YES | PARTIAL RESECTION (<90%)   |
| 249.00 | ROMA-IRE | 48.00 | M | 100.00 | ASTROC III                | TEMPORAL          | TEMPORAL          | YES | GROSS TOTAL RESECTION (>90 |

|        |                 |       |   |        |                           |                  |               |     |                            |
|--------|-----------------|-------|---|--------|---------------------------|------------------|---------------|-----|----------------------------|
| 250.00 | ROMA-IRE        | 64.00 | M | 100.00 | OTHER (ATIPIC MENINGIOMI) | TEMPORAL+PARIET/ | TEMPORAL+PARI | YES | GROSS TOTAL RESECTION (>90 |
| 251.00 | ROMA-IRE        | 34.00 | F | 100.00 | OLIGODENDROGLIOMA III     | TEMPORAL+PARIET/ | TEMPORAL+PARI | YES | GROSS TOTAL RESECTION (>90 |
| 252.00 | ROMA-IRE        | 69.00 | F | 70.00  | GBM                       | TEMPORAL+PARIET/ | TEMPORAL+PARI | YES | PARTIAL RESECTION (<90%)   |
| 253.00 | ROMA-IRE        | 22.00 | M | 70.00  | GBM                       | TEMPORAL+PARIET/ | TEMPORAL+PARI | NO  |                            |
| 254.00 | ROMA-IRE        | 68.00 | M | 70.00  | GBM                       | TEMPORAL+PARIET/ | TEMPORAL+PARI | NO  |                            |
| 255.00 | ROMA-IRE        | 63.00 | F | 70.00  | OLIGOASTROCITOMA III      | TEMPORAL+OCCIPIT | TEMPORAL+OCCI | YES | GROSS TOTAL RESECTION (>90 |
| 256.00 | ROMA-IRE        | 69.00 | F | 100.00 | GBM                       | PARIETAL         | PARIETAL      | YES | PARTIAL RESECTION (<90%)   |
| 257.00 | ROMA-IRE        | 22.00 | F | 100.00 | ASTROC III                | PARIETAL         | PARIETAL      | NO  |                            |
| 258.00 | ROMA-IRE        | 43.00 | M | 100.00 | OLIGOASTROCITOMA III      | PARIETAL         | PARIETAL      | NO  |                            |
| 259.00 | ROMA-IRE        | 35.00 | F | 100.00 | OLIGOASTROCITOMA III      | PARIETAL         | PARIETAL      | YES | GROSS TOTAL RESECTION (>90 |
| 260.00 | ROMA-IRE        | 68.00 | M | 80.00  | GBM                       | PARIETAL         | PARIETAL      | YES | PARTIAL RESECTION (<90%)   |
| 261.00 | ROMA-IRE        | 31.00 | M | 80.00  | ASTROC III                | PARIETAL         | PARIETAL      | YES | GROSS TOTAL RESECTION (>90 |
| 262.00 | ROMA-IRE        | 61.00 | F | 100.00 | OTHER (ATIPIC MENINGIOMI) | PARIETAL         | PARIETAL      | YES | GROSS TOTAL RESECTION (>90 |
| 263.00 | ROMA-IRE        | 78.00 | F | 100.00 | OTHER (ATIPIC MENINGIOMI) | OCCIPITAL        | OCCIPITAL     | YES | GROSS TOTAL RESECTION (>90 |
| 264.00 | ROMA-IRE        | 65.00 | F | 100.00 | GBM                       | MULTICENTRIC     | MULTICENTRIC  | YES | GROSS TOTAL RESECTION (>90 |
| 265.00 | ROMA-IRE        | 42.00 | M | 100.00 | GBM                       | MULTICENTRIC     | MULTICENTRIC  | YES | GROSS TOTAL RESECTION (>90 |
| 266.00 | ROMA-IRE        | 48.00 | M | 100.00 | GBM                       | MULTICENTRIC     | MULTICENTRIC  | YES | BIOPSY                     |
| 267.00 | ROMA-IRE        | 57.00 | M | 40.00  | GBM                       | MULTILOBULAR     | MULTICENTRIC  | YES | GROSS TOTAL RESECTION (>90 |
| 268.00 | ROMA-IRE        | 61.00 | F | 100.00 | GBM                       | MULTILOBULAR     | MULTICENTRIC  | YES | PARTIAL RESECTION (<90%)   |
| 269.00 | ROMA-IRE        | 31.00 | F | 100.00 | OLIGOASTROCITOMA III      | TEMPORAL+PARIET/ | TEMPORAL+PARI | NO  |                            |
| 270.00 | ROMA-IRE        | 45.00 | M | 90.00  | OLIGODENDROGLIOMA III     | FRONTAL+TEMPOR/  | FRONTAL+TEMP  | NO  |                            |
| 271.00 | ROMA-IRE        | 57.00 | F | 80.00  | METASTASES                | PARIETAL         | PARIETAL      | YES | GROSS TOTAL RESECTION (>90 |
| 272.00 | ROMA-IRE        | 66.00 | M | 70.00  | METASTASES                | MULTICENTRIC     | MULTICENTRIC  | YES | PARTIAL RESECTION (<90%)   |
| 273.00 | ROMA-IRE        | 52.00 | M | 100.00 | METASTASES                | MULTICENTRIC     | MULTICENTRIC  | NO  |                            |
| 274.00 | ROMA-IRE        | 75.00 | M | 70.00  | METASTASES                | MULTICENTRIC     | MULTICENTRIC  | NO  |                            |
| 275.00 | ROMA-IRE        | 49.00 | F | 90.00  | METASTASES                | PARIETAL         | PARIETAL      | YES | GROSS TOTAL RESECTION (>90 |
| 276.00 | ROMA-IRE        | 54.00 | F | 80.00  | METASTASES                | MULTICENTRIC     | MULTICENTRIC  | YES | PARTIAL RESECTION (<90%)   |
| 277.00 | ROMA-IRE        | 59.00 | F | 70.00  | METASTASES                | MULTICENTRIC     | MULTICENTRIC  | YES | PARTIAL RESECTION (<90%)   |
| 278.00 | ROMA-IRE        | 28.00 | M | 80.00  | METASTASES                | FRONTAL          | FRONTAL       | YES | BIOPSY                     |
| 279.00 | ROMA-IRE        | 60.00 | M | 90.00  | METASTASES                | FRONTAL          | FRONTAL       | YES | GROSS TOTAL RESECTION (>90 |
| 280.00 | ROMA-IRE        | 71.00 | M | 100.00 | METASTASES                | PARIETAL         | PARIETAL      | YES | PARTIAL RESECTION (<90%)   |
| 281.00 | ROMA-IRE        | 45.00 | M | 90.00  | METASTASES                | MULTICENTRIC     | MULTICENTRIC  | NO  |                            |
| 282.00 | ROMA-SAN PIETRO | 60.00 | M | 70.00  | METASTASES                | MULTICENTRIC     | MULTICENTRIC  | NO  |                            |
| 283.00 | ROMA-SAN PIETRO | 60.00 | F | 60.00  | METASTASES                | PARIETAL         | PARIETAL      | NO  |                            |
| 284.00 | ROMA-SAN PIETRO | 47.00 | M | 90.00  | METASTASES                | MULTICENTRIC     | MULTICENTRIC  | NO  |                            |
| 285.00 | ROMA-SAN PIETRO | 36.00 | M | 80.00  | ASTRO II                  | TEMPORAL         | TEMPORAL      | YES | GROSS TOTAL RESECTION (>90 |
| 286.00 | ROMA-SAN PIETRO | 65.00 | F | 70.00  | GBM                       | FRONTAL          | FRONTAL       | YES | PARTIAL RESECTION (<90%)   |
| 287.00 | ROMA-SAN PIETRO | 71.00 | F | 80.00  | METASTASES                | MULTICENTRIC     | MULTICENTRIC  | NO  |                            |
| 288.00 | ROMA-SAN PIETRO | 76.00 | F | 70.00  | METASTASES                | FRONTAL          | FRONTAL       | NO  |                            |
| 289.00 | ROMA-SAN PIETRO | 72.00 | M | 60.00  | METASTASES                | FRONTAL          | FRONTAL       | YES | GROSS TOTAL RESECTION (>90 |
| 290.00 | ROMA-SAN PIETRO | 58.00 | F | 40.00  | METASTASES                | MULTICENTRIC     | MULTICENTRIC  | NO  |                            |
| 291.00 | ROMA-SAN PIETRO | 55.00 | M | 70.00  | METASTASES                | MULTICENTRIC     | MULTICENTRIC  | NO  |                            |

|        |                     |       |   |        |                           |                   |                |     |                             |
|--------|---------------------|-------|---|--------|---------------------------|-------------------|----------------|-----|-----------------------------|
| 292.00 | ROMA-SAN PIETRO     | 51.00 | F | 60.00  | METASTASES                | PARIETAL+OCCIPITA | PARIETAL+OCCIP | YES | PARTIAL RESECTION (<90%)    |
| 293.00 | ROMA-SAN PIETRO     | 56.00 | F | 90.00  | METASTASES                | MULTICENTRIC      | MULTICENTRIC   | NO  |                             |
| 294.00 | ROMA-S.EUGENIO      | 37.00 | M |        | ASTRO II                  | FRONTAL           | FRONTAL        | YES | GROSS TOTAL RESECTION (>90) |
| 295.00 | ROMA-S.EUGENIO      | 75.00 | F |        | OTHER (ATIPIC MENINGIOMI) | MULTICENTRIC      | MULTICENTRIC   | NO  |                             |
| 296.00 | ROMA-S.EUGENIO      | 36.00 | M |        | ASTRO II                  | FRONTAL           | FRONTAL        | YES | GROSS TOTAL RESECTION (>90) |
| 297.00 | ROMA-S.EUGENIO      | 70.00 | M |        | METASTASES                | MULTICENTRIC      | MULTICENTRIC   | NO  |                             |
| 298.00 | ROMA-S.EUGENIO      | 59.00 | M |        | METASTASES                | PARIETAL          | PARIETAL       | NO  |                             |
| 299.00 | SASSARI-UOC NPI     | 5.00  | M | 90.00  | OTHER (ATIPIC MENINGIOMI) | FRONTAL           | FRONTAL        | YES | GROSS TOTAL RESECTION (>90) |
| 300.00 | ROMA SANT'ANDRE     | 63.00 | M | 90.00  | OTHER (ATIPIC MENINGIOMI) | FRONTAL           | FRONTAL        | NO  |                             |
| 301.00 | ROMA SANT'ANDRE     | 54.00 | M | 40.00  | ASTROC III                | FRONTAL           | FRONTAL        | YES | GROSS TOTAL RESECTION (>90) |
| 302.00 | ROMA SANT'ANDRE     | 64.00 | F | 100.00 | OTHER (ATIPIC MENINGIOMI) | FRONTAL           | FRONTAL        | YES | GROSS TOTAL RESECTION (>90) |
| 303.00 | ROMA SANT'ANDRE     | 53.00 | F | 100.00 | METASTASES                |                   |                | NO  |                             |
| 304.00 | ROMA SANT'ANDRE     | 43.00 | F | 100.00 | OTHER (ATIPIC MENINGIOMI) | TEMPORAL          | TEMPORAL       | YES | GROSS TOTAL RESECTION (>90) |
| 305.00 | ROMA SANT'ANDRE     | 63.00 | F | 50.00  | GBM                       | PARIETAL          | PARIETAL       | YES | GROSS TOTAL RESECTION (>90) |
| 306.00 | ROMA SANT'ANDRE     | 80.00 | F | 100.00 | OTHER (ATIPIC MENINGIOMI) | FRONTAL           | FRONTAL        | YES | GROSS TOTAL RESECTION (>90) |
| 307.00 | ROMA SANT'ANDRE     | 47.00 | F | 100.00 | METASTASES                |                   |                | NO  |                             |
| 308.00 | ROMA SANT'ANDRE     | 77.00 | M | 100.00 | OTHER (ATIPIC MENINGIOMI) | TEMPORAL          | TEMPORAL       | YES | GROSS TOTAL RESECTION (>90) |
| 309.00 | ROMA SANT'ANDRE     | 46.00 | F | 90.00  | GBM                       | PARIETAL          | PARIETAL       | YES | GROSS TOTAL RESECTION (>90) |
| 310.00 | ROMA SANT'ANDRE     | 31.00 | M | 100.00 | OTHER (ATIPIC MENINGIOMI) | PARIETAL          | PARIETAL       | NO  |                             |
| 311.00 | ROMA SANT'ANDRE     | 80.00 | F | 100.00 | OTHER (ATIPIC MENINGIOMI) | TEMPORAL          | TEMPORAL       | YES | GROSS TOTAL RESECTION (>90) |
| 312.00 | ROMA SANT'ANDRE     | 68.00 | F | 100.00 | OTHER (ATIPIC MENINGIOMI) | FRONTAL           | FRONTAL        | YES | GROSS TOTAL RESECTION (>90) |
| 313.00 | ROMA SANT'ANDRE     | 67.00 | F | 70.00  | GBM                       | FRONTAL           | FRONTAL        | YES | GROSS TOTAL RESECTION (>90) |
| 314.00 | ROMA SANT'ANDRE     | 66.00 | M | 70.00  | OLIGODENDROGLIOMA II      | FRONTAL           | FRONTAL        | YES | GROSS TOTAL RESECTION (>90) |
| 315.00 | ROMA SANT'ANDRE     | 71.00 | M | 100.00 | GBM                       | PARIETAL          | PARIETAL       | YES | GROSS TOTAL RESECTION (>90) |
| 316.00 | ROMA SANT'ANDRE     | 39.00 | F | 80.00  | GBM                       | PARIETAL          | PARIETAL       | YES | GROSS TOTAL RESECTION (>90) |
| 317.00 | ROMA SANT'ANDRE     | 24.00 | M | 100.00 | OTHER (ATIPIC MENINGIOMI) | TEMPORAL          | TEMPORAL       | YES | GROSS TOTAL RESECTION (>90) |
| 318.00 | ROMA SANT'ANDRE     | 63.00 | M | 100.00 | OLIGOASTROCITOMA II       |                   |                | YES | GROSS TOTAL RESECTION (>90) |
| 319.00 | ROMA SANT'ANDRE     | 36.00 | M | 100.00 | ASTRO II                  | FRONTAL           | FRONTAL        | YES | GROSS TOTAL RESECTION (>90) |
| 320.00 | ROMA SANT'ANDRE     | 35.00 | M | 100.00 | ASTROC III                | MULTILOBULAR      | MULTICENTRIC   | YES | BIOPSY                      |
| 321.00 | ROMA SANT'ANDRE     | 86.00 | M | 70.00  | ASTRO II                  | PARIETAL          | PARIETAL       | YES | GROSS TOTAL RESECTION (>90) |
| 322.00 | ROMA SANT'ANDRE     | 74.00 | M | 100.00 | OTHER (ATIPIC MENINGIOMI) | FRONTAL           | FRONTAL        | NO  |                             |
| 323.00 | ROMA SANT'ANDRE     | 80.00 | F | 70.00  | GBM                       | FRONTAL           | FRONTAL        | YES |                             |
| 324.00 | ROMA SANT'ANDRE     | 70.00 | F | 70.00  | GBM                       | FRONTAL           | FRONTAL        | YES | GROSS TOTAL RESECTION (>90) |
| 325.00 | ROMA SANT'ANDRE     | 60.00 | F | 90.00  | ASTRO II                  | PARIETAL          | PARIETAL       | YES | GROSS TOTAL RESECTION (>90) |
| 326.00 | ROMA SANT'ANDRE     | 56.00 | F | 100.00 | GBM                       | FRONTAL           | FRONTAL        | YES | GROSS TOTAL RESECTION (>90) |
| 327.00 | ROMA SANT'ANDRE     | 66.00 | F | 80.00  | METASTASES                |                   |                | YES | GROSS TOTAL RESECTION (>90) |
| 328.00 | ROMA SANT'ANDRE     | 57.00 | M | 90.00  | OTHER (ATIPIC MENINGIOMI) | FRONTAL           | FRONTAL        | YES | GROSS TOTAL RESECTION (>90) |
| 329.00 | ROMA SANT'ANDRE     | 48.00 | M | 100.00 | OLIGODENDROGLIOMA II      | FRONTAL           | FRONTAL        | YES | BIOPSY                      |
| 330.00 | ROMA SANT'ANDRE     | 72.00 | M | 80.00  | GBM                       | PARIETAL          | PARIETAL       | YES | GROSS TOTAL RESECTION (>90) |
| 331.00 | TORINO-Osp.Infantil | 9.00  | M | 90.00  | ASTROC III                | TEMPORAL          | TEMPORAL       | YES | PARTIAL RESECTION (<90%)    |
| 332.00 | TORINO-Osp.Infantil | 3.00  | M | 100.00 | OTHER (ATIPIC MENINGIOMI) | PARIETAL          | PARIETAL       | YES | GROSS TOTAL RESECTION (>90) |
| 333.00 | TORINO-Osp.Infantil | 9.00  | F | 80.00  | ASTRO II                  | MULTILOBULAR      | MULTICENTRIC   | YES | PARTIAL RESECTION (<90%)    |



|        |                     |       |   |        |                           |                  |                  |     |                             |
|--------|---------------------|-------|---|--------|---------------------------|------------------|------------------|-----|-----------------------------|
| 334.00 | TORINO-Osp.Infantil | 12.00 | F | 90.00  | OTHER (ATIPIC MENINGIOMI) | FRONTAL+PARIETAL | FRONTAL+PARIETAL | YES | GROSS TOTAL RESECTION (>90% |
| 335.00 | TORINO-Osp.Infantil | 14.00 | M | 60.00  | OTHER (ATIPIC MENINGIOMI) | MULTICENTRIC     | MULTICENTRIC     | YES | PARTIAL RESECTION (<90%)    |
| 336.00 | Napoli              | 34.00 | M |        | OLIGODENDROGLIOMA III     | FRONTAL          | FRONTAL          | YES | GROSS TOTAL RESECTION (>90% |
| 337.00 | Napoli              | 21.00 | F |        | ASTRO II                  | MULTICENTRIC     | MULTICENTRIC     | YES | PARTIAL RESECTION (<90%)    |
| 338.00 | Napoli              | 47.00 | F |        |                           | TEMPORAL         | TEMPORAL         | YES | PARTIAL RESECTION (<90%)    |
| 339.00 | Napoli              | 18.00 | F |        |                           |                  | TEMPORAL+PARI    | YES | PARTIAL RESECTION (<90%)    |
| 340.00 | Napoli              | 48.00 | M |        | GBM                       | FRONTAL          | FRONTAL          | YES | PARTIAL RESECTION (<90%)    |
| 341.00 | Napoli              | 26.00 | M |        | OLIGODENDROGLIOMA III     | FRONTAL          | FRONTAL          | YES | GROSS TOTAL RESECTION (>90% |
| 342.00 | Napoli              | 10.00 | M |        | ASTRO II                  | FRONTAL          | FRONTAL          | YES | PARTIAL RESECTION (<90%)    |
| 343.00 | Napoli              | 16.00 | M |        | ASTROC III                |                  | FRONTAL+TEMPC    | YES | GROSS TOTAL RESECTION (>90% |
| 344.00 | Napoli              | 8.00  | M |        | ASTRO II                  | TEMPORAL         | TEMPORAL         | YES | GROSS TOTAL RESECTION (>90% |
| 345.00 | Napoli              | 8.00  | F |        | ASTROC III                | FRONTAL          | FRONTAL          | YES | GROSS TOTAL RESECTION (>90% |
| 346.00 | Napoli              | 3.00  | F |        | ASTRO II                  |                  | FRONTAL+PARIET   | YES | PARTIAL RESECTION (<90%)    |
| 347.00 | Napoli              | 13.00 | F |        | OLIGODENDROGLIOMA II      | TEMPORAL         | TEMPORAL         | YES | GROSS TOTAL RESECTION (>90% |
| 348.00 | Napoli              | 16.00 | M |        | ASTRO II                  | TEMPORAL         | TEMPORAL         | YES | GROSS TOTAL RESECTION (>90% |
| 349.00 | Napoli              | 26.00 | F |        | OLIGODENDROGLIOMA II      | PARIETAL         | PARIETAL         | YES | PARTIAL RESECTION (<90%)    |
| 350.00 | Napoli              |       | F |        | ASTRO II                  |                  |                  | YES | PARTIAL RESECTION (<90%)    |
| 351.00 | Napoli              | 51.00 | M |        | ASTRO II                  | PARIETAL         | PARIETAL         | NO  |                             |
| 352.00 | Napoli              | 13.00 | M |        | OLIGODENDROGLIOMA II      | OCCIPITAL        | OCCIPITAL        | YES | GROSS TOTAL RESECTION (>90% |
| 353.00 | Napoli              | 68.00 | M |        | GBM                       |                  | TEMPORAL+PARI    | YES | GROSS TOTAL RESECTION (>90% |
| 354.00 | UDINE PAULETTO      | 33.00 | M | 90.00  | OLIGOASTROCITOMA II       | FRONTAL          | FRONTAL          | YES | GROSS TOTAL RESECTION (>90% |
| 355.00 | UDINE PAULETTO      | 36.00 | M | 100.00 | OLIGOASTROCITOMA II       | FRONTAL          | FRONTAL          | YES | GROSS TOTAL RESECTION (>90% |
| 356.00 | UDINE PAULETTO      | 28.00 | M | 90.00  | OLIGOASTROCITOMA III      | MULTICENTRIC     | MULTICENTRIC     | YES | PARTIAL RESECTION (<90%)    |
| 357.00 | UDINE PAULETTO      | 38.00 | M | 100.00 | ASTRO II                  | TEMPORAL         | TEMPORAL         | YES | GROSS TOTAL RESECTION (>90% |
| 358.00 | UDINE PAULETTO      | 37.00 | M | 100.00 | OLIGODENDROGLIOMA II      | TEMPORAL         | TEMPORAL         | YES | GROSS TOTAL RESECTION (>90% |
| 359.00 | UDINE PAULETTO      | 35.00 | M | 100.00 | ASTRO II                  | INSULA           | INSULA           | YES | PARTIAL RESECTION (<90%)    |
| 360.00 | UDINE PAULETTO      | 41.00 | M | 90.00  | ASTRO II                  | PARIETAL         | PARIETAL         | YES | GROSS TOTAL RESECTION (>90% |
| 361.00 | UDINE PAULETTO      | 58.00 | F | 80.00  | GBM                       | TEMPORAL         | TEMPORAL         | YES | GROSS TOTAL RESECTION (>90% |
| 362.00 | UDINE PAULETTO      | 52.00 | F | 80.00  | ASTROC III                | FRONTAL          | FRONTAL          | YES | GROSS TOTAL RESECTION (>90% |
| 363.00 | UDINE PAULETTO      | 37.00 | F | 90.00  | ASTROC III                | INSULA           | INSULA           | YES | GROSS TOTAL RESECTION (>90% |
| 364.00 | UDINE PAULETTO      | 40.00 | F | 80.00  | OLIGOASTROCITOMA III      | PARIETAL         | PARIETAL         | YES | GROSS TOTAL RESECTION (>90% |
| 365.00 | UDINE PAULETTO      | 47.00 | M | 100.00 | OLIGOASTROCITOMA II       | INSULA           | INSULA           | YES | GROSS TOTAL RESECTION (>90% |
| 366.00 | UDINE PAULETTO      | 44.00 | M | 90.00  | OLIGODENDROGLIOMA II      | FRONTAL          | FRONTAL          | YES | GROSS TOTAL RESECTION (>90% |
| 367.00 | UDINE PAULETTO      | 38.00 | F | 90.00  | OLIGODENDROGLIOMA II      | INSULA           | INSULA           | YES | GROSS TOTAL RESECTION (>90% |
| 368.00 | UDINE PAULETTO      | 45.00 | M | 80.00  | OLIGODENDROGLIOMA III     | INSULA           | INSULA           | YES | GROSS TOTAL RESECTION (>90% |
| 369.00 | UDINE PAULETTO      | 63.00 | F | 60.00  | OLIGODENDROGLIOMA II      | FRONTAL          | FRONTAL          | YES | GROSS TOTAL RESECTION (>90% |
| 370.00 | UDINE PAULETTO      | 44.00 | M | 80.00  | GBM                       | TEMPORAL         | TEMPORAL         | YES | PARTIAL RESECTION (<90%)    |
| 371.00 | UDINE PAULETTO      | 47.00 | F | 100.00 | OLIGODENDROGLIOMA II      | FRONTAL          | FRONTAL          | YES | GROSS TOTAL RESECTION (>90% |
| 372.00 | UDINE PAULETTO      | 41.00 | F | 90.00  | OLIGODENDROGLIOMA II      | FRONTAL          | FRONTAL          | YES | GROSS TOTAL RESECTION (>90% |
| 373.00 | UDINE PAULETTO      | 52.00 | M | 90.00  | GBM                       | TEMPORAL         | TEMPORAL         | YES | GROSS TOTAL RESECTION (>90% |
| 374.00 | UDINE PAULETTO      | 41.00 | F | 90.00  | ASTROC III                | FRONTAL          | FRONTAL          | YES | GROSS TOTAL RESECTION (>90% |
| 375.00 | UDINE PAULETTO      | 58.00 | M | 100.00 | ASTRO II                  | PARIETAL         | PARIETAL         | YES | BIOPSY                      |

|        |                  |         |                                  |                   |                  |     |                            |
|--------|------------------|---------|----------------------------------|-------------------|------------------|-----|----------------------------|
| 376.00 | UDINE PAULETTO   | 31.00 F | 90.00 ASTRO II                   | FRONTAL           | FRONTAL          | YES | BIOPSY                     |
| 377.00 | UDINE PAULETTO   | 38.00 M | 80.00 ASTRO II                   | INSULA            | INSULA           | YES | BIOPSY                     |
| 378.00 | ROMA-LA SAPIENZA | 55.00 M | 60.00 GBM                        | FRONTAL           | FRONTAL          | YES | GROSS TOTAL RESECTION (>90 |
| 379.00 | ROMA-LA SAPIENZA | 59.00 F | 60.00 GBM                        | FRONTAL           | FRONTAL          | YES | GROSS TOTAL RESECTION (>90 |
| 380.00 | ROMA-LA SAPIENZA | 61.00 F | 70.00 GBM                        | FRONTAL           | FRONTAL          | YES | GROSS TOTAL RESECTION (>90 |
| 381.00 | ROMA-LA SAPIENZA | 62.00 F | 90.00 GBM                        | TEMPORAL          | TEMPORAL         | YES | GROSS TOTAL RESECTION (>90 |
| 382.00 | ROMA-LA SAPIENZA | 67.00 M | 90.00 GBM                        | TEMPORAL          | TEMPORAL         | YES | GROSS TOTAL RESECTION (>90 |
| 383.00 | ROMA-LA SAPIENZA | 34.00 F | 80.00 GBM                        | PARIETAL+OCCIPITA | PARIETAL+OCCIP   | YES | GROSS TOTAL RESECTION (>90 |
| 384.00 | ROMA-LA SAPIENZA | 62.00 M | 60.00 GBM                        | FRONTAL           | FRONTAL          | YES | PARTIAL RESECTION (<90%)   |
| 385.00 | ROMA-LA SAPIENZA | 47.00 M | 90.00 GBM                        | TEMPORAL          | TEMPORAL         | YES | BIOPSY                     |
| 386.00 | ROMA-LA SAPIENZA | 32.00 F | 80.00 GBM                        | FRONTAL+TEMPORAL  | FRONTAL+TEMPORAL | YES | PARTIAL RESECTION (<90%)   |
| 387.00 | ROMA-LA SAPIENZA | 73.00 M | 70.00 GBM                        | TEMPORAL          | TEMPORAL         | YES | GROSS TOTAL RESECTION (>90 |
| 388.00 | ROMA-LA SAPIENZA | 71.00 M | 90.00 GBM                        | TEMPORAL          | TEMPORAL         | YES | GROSS TOTAL RESECTION (>90 |
| 389.00 | ROMA-LA SAPIENZA | 64.00 M | 70.00 ASTROC III                 | FRONTAL           | FRONTAL          | YES | PARTIAL RESECTION (<90%)   |
| 390.00 | ROMA-LA SAPIENZA | 48.00 M | 60.00 GBM                        | FRONTAL+PARIETAL  | FRONTAL+PARIETAL | YES | GROSS TOTAL RESECTION (>90 |
| 391.00 | ROMA-LA SAPIENZA | 62.00 M | 80.00 GBM                        | TEMPORAL          | TEMPORAL         | YES | PARTIAL RESECTION (<90%)   |
| 392.00 | ROMA-LA SAPIENZA | 53.00 M | 100.00 GBM                       | FRONTAL           | FRONTAL          | YES | GROSS TOTAL RESECTION (>90 |
| 393.00 | ROMA-LA SAPIENZA | 36.00 M | 100.00 ASTROC III                | FRONTAL           | FRONTAL          | YES | GROSS TOTAL RESECTION (>90 |
| 394.00 | ROMA-LA SAPIENZA | 71.00 F | 90.00 GBM                        | TEMPORAL          | TEMPORAL         | YES | GROSS TOTAL RESECTION (>90 |
| 395.00 | ROMA-LA SAPIENZA | 63.00 F | 100.00 ASTROC III                | FRONTAL           | FRONTAL          | YES | GROSS TOTAL RESECTION (>90 |
| 396.00 | ROMA-LA SAPIENZA | 57.00 M | 100.00 GBM                       | TEMPORAL          | TEMPORAL         | YES | GROSS TOTAL RESECTION (>90 |
| 397.00 | ROMA-LA SAPIENZA | 56.00 M | 70.00 GBM                        | PARIETAL          | PARIETAL         | YES | GROSS TOTAL RESECTION (>90 |
| 398.00 | ROMA-LA SAPIENZA | 58.00 M | 100.00 ASTROC III                | FRONTAL+TEMPORAL  | FRONTAL+TEMPORAL | YES | PARTIAL RESECTION (<90%)   |
| 399.00 | ROMA-LA SAPIENZA | 29.00 M | 90.00 OLIGODENDROGLIOMA II       | FRONTAL+PARIETAL  | FRONTAL+PARIETAL | YES | PARTIAL RESECTION (<90%)   |
| 400.00 | ROMA-LA SAPIENZA | 72.00 F | 60.00 GBM                        | FRONTAL           | FRONTAL          | YES | GROSS TOTAL RESECTION (>90 |
| 401.00 | ROMA-LA SAPIENZA | 70.00 M | 80.00 GBM                        | PARIETAL          | PARIETAL         | YES | GROSS TOTAL RESECTION (>90 |
| 402.00 | ROMA-LA SAPIENZA | 61.00 F | 60.00 GBM                        | FRONTAL           | FRONTAL          | YES | GROSS TOTAL RESECTION (>90 |
| 403.00 | ROMA-LA SAPIENZA | 52.00 M | 70.00 GBM                        | PARIETAL          | PARIETAL         | YES | GROSS TOTAL RESECTION (>90 |
| 404.00 | ROMA-LA SAPIENZA | 55.00 F | 90.00 GBM                        | TEMPORAL          | TEMPORAL         | YES | GROSS TOTAL RESECTION (>90 |
| 405.00 | ROMA-LA SAPIENZA | 22.00 F | 100.00 ASTROC III                | FRONTAL           | FRONTAL          | YES | PARTIAL RESECTION (<90%)   |
| 406.00 | ROMA-LA SAPIENZA | 19.00 M | 100.00 GBM                       | PARIETAL          | PARIETAL         | YES | GROSS TOTAL RESECTION (>90 |
| 407.00 | ROMA-LA SAPIENZA | 47.00 M | 100.00 GBM                       | FRONTAL           | FRONTAL          | YES | GROSS TOTAL RESECTION (>90 |
| 408.00 | ROMA-LA SAPIENZA | 48.00 M | 90.00 GBM                        | FRONTAL           | FRONTAL          | YES | GROSS TOTAL RESECTION (>90 |
| 409.00 | ROMA-LA SAPIENZA | 58.00 F | 60.00 GBM                        | TEMPORAL          | TEMPORAL         | YES | GROSS TOTAL RESECTION (>90 |
| 410.00 | ROMA-LA SAPIENZA | 57.00 F | 90.00 GBM                        | PARIETAL          | PARIETAL         | YES | GROSS TOTAL RESECTION (>90 |
| 411.00 | ROMA-LA SAPIENZA | 20.00 M | 100.00 GBM                       | FRONTAL           | FRONTAL          | YES | GROSS TOTAL RESECTION (>90 |
| 412.00 | VARESE           | 71.00 F | 60.00 GBM                        | TEMPORAL          | TEMPORAL         | YES | GROSS TOTAL RESECTION (>90 |
| 413.00 | VARESE           | 74.00 F | 100.00 OTHER (ATIPIC MENINGIOMI) | FRONTAL           | FRONTAL          | YES | GROSS TOTAL RESECTION (>90 |
| 414.00 | VARESE           | 16.00 F | 100.00 OTHER (ATIPIC MENINGIOMI) | FRONTAL           | FRONTAL          | YES | GROSS TOTAL RESECTION (>90 |
| 415.00 | VARESE           | 58.00 M | 100.00 OTHER (ATIPIC MENINGIOMI) | FRONTAL           | FRONTAL          | NO  |                            |
| 416.00 | VARESE           | 61.00 F | 100.00 OTHER (ATIPIC MENINGIOMI) | PARIETAL          | PARIETAL         | YES | GROSS TOTAL RESECTION (>90 |
| 417.00 | VARESE           | 23.00 M | 90.00 OTHER (ATIPIC MENINGIOMI)  | OCCIPITAL         | OCCIPITAL        | YES | GROSS TOTAL RESECTION (>90 |

|        |        |       |   |        |                           |                 |              |     |                            |
|--------|--------|-------|---|--------|---------------------------|-----------------|--------------|-----|----------------------------|
| 418.00 | VARESE | 51.00 | F | 100.00 | OTHER (ATIPIC MENINGIOMI) | PARIETAL        | PARIETAL     | YES | GROSS TOTAL RESECTION (>9C |
| 419.00 | VARESE | 9.00  | M | 100.00 | OTHER (ATIPIC MENINGIOMI) | OCCIPITAL       | OCCIPITAL    | YES | GROSS TOTAL RESECTION (>9C |
| 420.00 | VARESE | 58.00 | F | 100.00 | OTHER (ATIPIC MENINGIOMI) | PARIETAL        | PARIETAL     | YES | GROSS TOTAL RESECTION (>9C |
| 421.00 | VARESE | 19.00 | M | 100.00 | ASTRO II                  | HYPOTHALAMIC OP | HYPOTHALAMIC | YES | GROSS TOTAL RESECTION (>9C |
| 422.00 | VARESE | 37.00 | M | 100.00 | OLIGODENDROGLIOMA II      | PARIETAL        | PARIETAL     | YES | GROSS TOTAL RESECTION (>9C |
| 423.00 | VARESE | 33.00 | M | 90.00  | OLIGODENDROGLIOMA II      | FRONTAL         | FRONTAL      | YES | GROSS TOTAL RESECTION (>9C |
| 424.00 | VARESE | 39.00 | F | 100.00 | OTHER (ATIPIC MENINGIOMI) | PARIETAL        | PARIETAL     | YES | GROSS TOTAL RESECTION (>9C |
| 425.00 | VARESE | 79.00 | F | 100.00 | OTHER (ATIPIC MENINGIOMI) | FRONTAL         | FRONTAL      | NO  |                            |
| 426.00 | VARESE | 67.00 | M | 100.00 | OTHER (ATIPIC MENINGIOMI) | FRONTAL         | FRONTAL      | YES | GROSS TOTAL RESECTION (>9C |
| 427.00 | VARESE | 51.00 | F | 100.00 | OTHER (ATIPIC MENINGIOMI) | PARIETAL        | PARIETAL     | YES | GROSS TOTAL RESECTION (>9C |
| 428.00 | VARESE | 56.00 | M | 100.00 | OTHER (ATIPIC MENINGIOMI) | FRONTAL         | FRONTAL      | YES | GROSS TOTAL RESECTION (>9C |
| 429.00 | VARESE | 43.00 | M | 100.00 | OTHER (ATIPIC MENINGIOMI) | CEREBELLAR      | CEREBELLAR   | YES | GROSS TOTAL RESECTION (>9C |
| 430.00 | VARESE | 29.00 | F | 100.00 | GBM                       | FRONTAL         | FRONTAL      | YES | GROSS TOTAL RESECTION (>9C |
| 431.00 | VARESE |       | M | 100.00 | OTHER (ATIPIC MENINGIOMI) | FRONTAL         | FRONTAL      | YES | GROSS TOTAL RESECTION (>9C |
| 432.00 | VARESE | 62.00 | M | 70.00  | GBM                       | TEMPORAL        | TEMPORAL     | YES | GROSS TOTAL RESECTION (>9C |
| 433.00 | VARESE | 46.00 | M | 100.00 | OTHER (ATIPIC MENINGIOMI) | TEMPORAL        | TEMPORAL     | YES | GROSS TOTAL RESECTION (>9C |
| 434.00 | VARESE | 45.00 | F | 100.00 | OTHER (ATIPIC MENINGIOMI) | TEMPORAL        | TEMPORAL     | YES | GROSS TOTAL RESECTION (>9C |
| 435.00 | VARESE | 68.00 | F | 100.00 | OTHER (ATIPIC MENINGIOMI) | TEMPORAL        | TEMPORAL     | YES | GROSS TOTAL RESECTION (>9C |
| 436.00 | VARESE | 63.00 | F | 70.00  | GBM                       | PARIETAL        | PARIETAL     | YES | GROSS TOTAL RESECTION (>9C |
| 437.00 | VARESE | 64.00 | F | 100.00 | OTHER (ATIPIC MENINGIOMI) | FRONTAL         | FRONTAL      | YES | GROSS TOTAL RESECTION (>9C |
| 438.00 | VARESE | 61.00 | F | 100.00 | OTHER (ATIPIC MENINGIOMI) | TEMPORAL        | TEMPORAL     | YES | GROSS TOTAL RESECTION (>9C |
| 439.00 | VARESE | 60.00 | F | 100.00 | OTHER (ATIPIC MENINGIOMI) | PARIETAL        | PARIETAL     | YES | GROSS TOTAL RESECTION (>9C |
| 440.00 | VARESE | 28.00 | F | 100.00 | OLIGODENDROGLIOMA III     | FRONTAL         | FRONTAL      | YES | GROSS TOTAL RESECTION (>9C |
| 441.00 | VARESE | 31.00 | F | 100.00 | OTHER (ATIPIC MENINGIOMI) | FRONTAL         | FRONTAL      | YES | GROSS TOTAL RESECTION (>9C |
| 442.00 | VARESE | 27.00 | F | 80.00  | GBM                       | FRONTAL         | FRONTAL      | YES | GROSS TOTAL RESECTION (>9C |
| 443.00 | VARESE | 56.00 | F | 100.00 | OTHER (ATIPIC MENINGIOMI) | FRONTAL         | FRONTAL      | YES | GROSS TOTAL RESECTION (>9C |
| 444.00 | VARESE | 41.00 | M | 100.00 | OLIGODENDROGLIOMA II      | FRONTAL         | FRONTAL      | YES | GROSS TOTAL RESECTION (>9C |
| 445.00 | VARESE | 36.00 | M | 100.00 | OLIGODENDROGLIOMA II      | INSULA          | INSULA       | YES | GROSS TOTAL RESECTION (>9C |
| 446.00 | VARESE | 52.00 | M | 100.00 | OTHER (ATIPIC MENINGIOMI) | OCCIPITAL       | OCCIPITAL    | YES | GROSS TOTAL RESECTION (>9C |
| 447.00 | VARESE | 49.00 | F | 100.00 | OTHER (ATIPIC MENINGIOMI) | FRONTAL         | FRONTAL      | YES | GROSS TOTAL RESECTION (>9C |
| 448.00 | VARESE | 12.00 | M | 100.00 | ASTRO II                  | OCCIPITAL       | OCCIPITAL    | YES | GROSS TOTAL RESECTION (>9C |
| 449.00 | VARESE | 30.00 | F | 100.00 | OTHER (ATIPIC MENINGIOMI) | PARIETAL        | PARIETAL     | YES | GROSS TOTAL RESECTION (>9C |
| 450.00 | VARESE | 34.00 | M | 100.00 | OTHER (ATIPIC MENINGIOMI) | CEREBELLAR      | CEREBELLAR   | YES | GROSS TOTAL RESECTION (>9C |
| 451.00 | VARESE | 53.00 | M | 100.00 | OTHER (ATIPIC MENINGIOMI) | OCCIPITAL       | OCCIPITAL    | YES | GROSS TOTAL RESECTION (>9C |
| 452.00 | VARESE | 55.00 | F | 100.00 | OTHER (ATIPIC MENINGIOMI) | PARIETAL        | PARIETAL     | YES | GROSS TOTAL RESECTION (>9C |
| 453.00 | VARESE | 42.00 | F | 100.00 | OTHER (ATIPIC MENINGIOMI) | PARIETAL        | PARIETAL     | YES | GROSS TOTAL RESECTION (>9C |
| 454.00 | VARESE | 30.00 | F | 100.00 | OTHER (ATIPIC MENINGIOMI) | FRONTAL         | FRONTAL      | YES | GROSS TOTAL RESECTION (>9C |
| 455.00 | VARESE | 71.00 | F | 100.00 | OTHER (ATIPIC MENINGIOMI) | FRONTAL         | FRONTAL      | YES | GROSS TOTAL RESECTION (>9C |
| 456.00 | VARESE | 36.00 | M | 100.00 | OTHER (ATIPIC MENINGIOMI) | OCCIPITAL       | OCCIPITAL    | YES | GROSS TOTAL RESECTION (>9C |
| 457.00 | VARESE | 30.00 | M | 100.00 | ASTRO II                  | TEMPORAL        | TEMPORAL     | YES | GROSS TOTAL RESECTION (>9C |
| 458.00 | VARESE | 51.00 | F | 90.00  | GBM                       | OCCIPITAL       | OCCIPITAL    | YES | GROSS TOTAL RESECTION (>9C |
| 459.00 | VARESE | 35.00 | F | 100.00 | OLIGODENDROGLIOMA II      | FRONTAL         | FRONTAL      | YES | GROSS TOTAL RESECTION (>9C |

|        |           |       |   |        |                           |              |                |     |                            |
|--------|-----------|-------|---|--------|---------------------------|--------------|----------------|-----|----------------------------|
| 460.00 | VARESE    | 44.00 | F | 100.00 | METASTASES                | OCCIPITAL    | OCCIPITAL      | YES | GROSS TOTAL RESECTION (>90 |
| 461.00 | VARESE    | 70.00 | F | 100.00 | OTHER (ATIPIC MENINGIOMI) | FRONTAL      | FRONTAL        | YES | GROSS TOTAL RESECTION (>90 |
| 462.00 | VARESE    | 68.00 | F | 100.00 | OTHER (ATIPIC MENINGIOMI) | PARIETAL     | PARIETAL       | YES | GROSS TOTAL RESECTION (>90 |
| 463.00 | VENEZIA   | 36.00 | M | 100.00 | GBM                       | FRONTAL      | FRONTAL        | YES | GROSS TOTAL RESECTION (>90 |
| 464.00 | VENEZIA   | 67.00 | M | 100.00 | GBM                       | PARIETAL     | PARIETAL       | YES | GROSS TOTAL RESECTION (>90 |
| 465.00 | VENEZIA   | 55.00 | M | 80.00  | ASTROC III                | TEMPORAL     | TEMPORAL       | YES | PARTIAL RESECTION (<90%)   |
| 466.00 | VENEZIA   | 64.00 | M | 100.00 | ASTROC III                | MULTILOBULAR | MULTICENTRIC   | YES | PARTIAL RESECTION (<90%)   |
| 467.00 | VENEZIA   | 46.00 | F | 80.00  | GBM                       | FRONTAL      | FRONTAL        | YES | PARTIAL RESECTION (<90%)   |
| 468.00 | VENEZIA   | 74.00 | M | 100.00 | OLIGODENDROGLIOMA II      | FRONTAL      | FRONTAL        | YES | GROSS TOTAL RESECTION (>90 |
| 469.00 | VENEZIA   | 42.00 | M | 100.00 | ASTRO II                  | FRONTAL      | FRONTAL        | YES | BIOPSY                     |
| 470.00 | VENEZIA   | 58.00 | F | 80.00  | METASTASES                | MULTILOBULAR | MULTICENTRIC   | YES | BIOPSY                     |
| 471.00 | VENEZIA   | 73.00 | M | 60.00  | METASTASES                | MULTILOBULAR | MULTICENTRIC   | NO  |                            |
| 472.00 | VENEZIA   | 66.00 | F | 90.00  | GBM                       | MULTILOBULAR | MULTICENTRIC   | YES | BIOPSY                     |
| 473.00 | VERONA    | 56.00 | M | 100.00 | GBM                       | PARIETAL     | PARIETAL       | YES | PARTIAL RESECTION (<90%)   |
| 474.00 | UCSC Roma | 33.00 | F | 80.00  | ASTROC III                | FRONTAL      | FRONTAL        | YES | PARTIAL RESECTION (<90%)   |
| 475.00 | UCSC Roma | 58.00 | M | 60.00  | GBM                       | PARIETAL     | PARIETAL       | YES | GROSS TOTAL RESECTION (>90 |
| 476.00 | UCSC Roma | 49.00 | M | 90.00  | OLIGOASTROCITOMA II       |              | PARIETAL+OCCIP | YES | PARTIAL RESECTION (<90%)   |
| 477.00 | UCSC Roma | 46.00 | M | 100.00 | OTHER (ATIPIC MENINGIOMI) | PARIETAL     | PARIETAL       | YES | GROSS TOTAL RESECTION (>90 |
| 478.00 | UCSC Roma | 50.00 | M | 60.00  | OLIGODENDROGLIOMA III     | FRONTAL      | FRONTAL        | YES | GROSS TOTAL RESECTION (>90 |
| 479.00 | UCSC Roma | 41.00 | F | 90.00  | OLIGOASTROCITOMA III      | FRONTAL      | FRONTAL        | YES | GROSS TOTAL RESECTION (>90 |
| 480.00 | UCSC Roma | 47.00 | F | 90.00  | GBM                       | TEMPORAL     | TEMPORAL       | YES | GROSS TOTAL RESECTION (>90 |
| 481.00 | UCSC Roma | 45.00 | F | 80.00  | ASTROC III                | FRONTAL      | FRONTAL        | YES | GROSS TOTAL RESECTION (>90 |
| 482.00 | UCSC Roma | 56.00 | F | 50.00  | OLIGODENDROGLIOMA III     | PARIETAL     | PARIETAL       | YES | PARTIAL RESECTION (<90%)   |
| 483.00 | UCSC Roma | 31.00 | M | 100.00 | GBM                       |              | FRONTAL+PARIET | YES | GROSS TOTAL RESECTION (>90 |
| 484.00 | UCSC Roma | 42.00 | F | 100.00 | OLIGODENDROGLIOMA III     | BILATERAL    | MULTICENTRIC   | YES | BIOPSY                     |
| 485.00 | UCSC Roma | 34.00 | F | 60.00  | OLIGODENDROGLIOMA II      | FRONTAL      | FRONTAL        | YES |                            |
| 486.00 | UCSC Roma | 21.00 | M | 90.00  | ASTROC III                | FRONTAL      | FRONTAL        | YES | GROSS TOTAL RESECTION (>90 |
| 487.00 | UCSC Roma | 62.00 | F | 80.00  | GBM                       | PARIETAL     | PARIETAL       | YES | GROSS TOTAL RESECTION (>90 |
| 488.00 | UCSC Roma | 74.00 | M | 70.00  | GBM                       |              | TEMPORAL+PARI  | YES | GROSS TOTAL RESECTION (>90 |
| 489.00 | UCSC Roma | 63.00 | M | 30.00  | GBM                       | FRONTAL      | FRONTAL        | YES | GROSS TOTAL RESECTION (>90 |
| 490.00 | UCSC Roma | 64.00 | F | 70.00  | OLIGODENDROGLIOMA III     | TEMPORAL     | TEMPORAL       | YES | PARTIAL RESECTION (<90%)   |
| 491.00 | UCSC Roma | 68.00 | M | 50.00  | OLIGODENDROGLIOMA III     | FRONTAL      | FRONTAL        | YES | PARTIAL RESECTION (<90%)   |
| 492.00 | UCSC Roma | 55.00 | F | 40.00  | GBM                       | FRONTAL      | FRONTAL        | YES | PARTIAL RESECTION (<90%)   |
| 493.00 | UCSC Roma | 42.00 | M | 100.00 | GBM                       | PARIETAL     | PARIETAL       | YES | GROSS TOTAL RESECTION (>90 |
| 494.00 | UCSC Roma | 69.00 | F | 60.00  | GBM                       |              | FRONTAL+PARIET | YES | PARTIAL RESECTION (<90%)   |
| 495.00 | UCSC Roma | 48.00 | F | 60.00  | GBM                       |              | TEMPORAL+PARI  | YES | GROSS TOTAL RESECTION (>90 |
| 496.00 | UCSC Roma | 25.00 | M | 100.00 | OLIGOASTROCITOMA III      | FRONTAL      | FRONTAL        | YES | GROSS TOTAL RESECTION (>90 |
| 497.00 | UCSC Roma | 56.00 | F | 100.00 | OLIGOASTROCITOMA III      | TEMPORAL     | TEMPORAL       | YES | GROSS TOTAL RESECTION (>90 |
| 498.00 | UCSC Roma | 40.00 | M | 100.00 | ASTROC III                | FRONTAL      | FRONTAL        | YES | GROSS TOTAL RESECTION (>90 |
| 499.00 | UCSC Roma | 48.00 | M | 70.00  | OLIGOASTROCITOMA III      | TEMPORAL     | TEMPORAL       | YES | GROSS TOTAL RESECTION (>90 |
| 500.00 | UCSC Roma | 58.00 | M | 80.00  | GBM                       | OCCIPITAL    | OCCIPITAL      | YES | PARTIAL RESECTION (<90%)   |
| 501.00 | UCSC Roma | 31.00 | F | 100.00 | GBM                       |              | FRONTAL+PARIET | YES | GROSS TOTAL RESECTION (>90 |

|        |           |       |   |        |                           |              |                |     |                              |
|--------|-----------|-------|---|--------|---------------------------|--------------|----------------|-----|------------------------------|
| 502.00 | UCSC Roma | 61.00 | M | 40.00  | GBM                       | MULTILOBULAR | MULTICENTRIC   | YES | BIOPSY                       |
| 503.00 | UCSC Roma | 33.00 | M | 50.00  | GBM                       | MULTILOBULAR | MULTICENTRIC   | YES | PARTIAL RESECTION (<90%)     |
| 504.00 | UCSC Roma | 70.00 | M | 50.00  | GBM                       | FRONTAL      | FRONTAL        | YES | GROSS TOTAL RESECTION (>90%) |
| 505.00 | UCSC Roma | 57.00 | F |        | GBM                       | MULTILOBULAR | MULTICENTRIC   | YES | BIOPSY                       |
| 506.00 | UCSC Roma | 74.00 | F | 50.00  | GBM                       | MULTILOBULAR | MULTICENTRIC   | YES | PARTIAL RESECTION (<90%)     |
| 507.00 | UCSC Roma | 67.00 | M | 40.00  | OTHER (ATIPIC MENINGIOMI) | MULTICENTRIC | MULTICENTRIC   | YES | PARTIAL RESECTION (<90%)     |
| 508.00 | UCSC Roma | 42.00 | F | 60.00  | OLIGODENDROGLIOMA III     |              | FRONTAL+PARIET | YES | PARTIAL RESECTION (<90%)     |
| 509.00 | UCSC Roma | 46.00 | M | 100.00 | OLIGOASTROCITOMA III      | PARIETAL     | PARIETAL       | YES | GROSS TOTAL RESECTION (>90%) |
| 510.00 | UCSC Roma | 36.00 | F | 90.00  | OLIGOASTROCITOMA III      | FRONTAL      | FRONTAL        | YES | PARTIAL RESECTION (<90%)     |
| 511.00 | UCSC Roma | 51.00 | F | 80.00  |                           | FRONTAL      | FRONTAL        | YES | PARTIAL RESECTION (<90%)     |
| 512.00 | UCSC Roma | 42.00 | F | 70.00  | ASTRO II                  |              | FRONTAL+PARIET | YES | BIOPSY                       |
| 513.00 | UCSC Roma | 61.00 | F | 70.00  | OLIGOASTROCITOMA II       | FRONTAL      | FRONTAL        | YES | PARTIAL RESECTION (<90%)     |
| 514.00 | UCSC Roma | 62.00 | M | 90.00  | GBM                       | FRONTAL      | FRONTAL        | YES | PARTIAL RESECTION (<90%)     |
| 515.00 | UCSC Roma | 67.00 | F | 70.00  | GBM                       |              | TEMPORAL+PARI  | YES | GROSS TOTAL RESECTION (>90%) |
| 516.00 | UCSC Roma | 54.00 | F | 100.00 | OLIGODENDROGLIOMA III     | PARIETAL     | PARIETAL       | YES | GROSS TOTAL RESECTION (>90%) |
| 517.00 | UCSC Roma | 45.00 | F | 60.00  | GBM                       |              | FRONTAL+TEMP   | YES | PARTIAL RESECTION (<90%)     |
| 518.00 | UCSC Roma | 35.00 | M | 80.00  | OLIGOASTROCITOMA II       | FRONTAL      | FRONTAL        | YES | GROSS TOTAL RESECTION (>90%) |
| 519.00 | UCSC Roma | 42.00 | M | 90.00  | ASTROC III                | FRONTAL      | FRONTAL        | YES | PARTIAL RESECTION (<90%)     |
| 520.00 | UCSC Roma | 50.00 | F | 50.00  |                           | BILATERAL    | MULTICENTRIC   | YES | PARTIAL RESECTION (<90%)     |
| 521.00 | UCSC Roma | 42.00 | F | 100.00 |                           | FRONTAL      | FRONTAL        | YES | PARTIAL RESECTION (<90%)     |
| 522.00 | UCSC Roma | 44.00 | M | 40.00  | ASTROC III                | FRONTAL      | FRONTAL        | YES | PARTIAL RESECTION (<90%)     |
| 523.00 | UCSC Roma | 57.00 | F | 90.00  | OTHER (ATIPIC MENINGIOMI) |              | FRONTAL+OCCI   | YES | GROSS TOTAL RESECTION (>90%) |
| 524.00 | UCSC Roma | 55.00 | M | 40.00  |                           | TEMPORAL     | TEMPORAL       | YES | PARTIAL RESECTION (<90%)     |
| 525.00 | UCSC Roma | 53.00 | M | 70.00  | GBM                       | TEMPORAL     | TEMPORAL       | YES | PARTIAL RESECTION (<90%)     |
| 526.00 | UCSC Roma | 74.00 | M |        |                           | FRONTAL      | FRONTAL        | NO  |                              |
| 527.00 | UCSC Roma | 41.00 | M | 70.00  | OLIGODENDROGLIOMA III     | FRONTAL      | FRONTAL        | YES | GROSS TOTAL RESECTION (>90%) |
| 528.00 | UCSC Roma | 56.00 | F | 70.00  | METASTASES                |              | TEMPORAL+INSU  | YES | PARTIAL RESECTION (<90%)     |
| 529.00 | UCSC Roma | 76.00 | F | 70.00  | OLIGOASTROCITOMA III      | TEMPORAL     | TEMPORAL       | YES | GROSS TOTAL RESECTION (>90%) |
| 530.00 | UCSC Roma | 75.00 | M | 70.00  | OTHER (ATIPIC MENINGIOMI) | BILATERAL    | MULTICENTRIC   | YES | PARTIAL RESECTION (<90%)     |
| 531.00 | UCSC Roma | 37.00 | M | 80.00  | OLIGOASTROCITOMA III      | FRONTAL      | FRONTAL        | YES | GROSS TOTAL RESECTION (>90%) |
| 532.00 | UCSC Roma | 18.00 | M | 80.00  | ASTROC III                | FRONTAL      | FRONTAL        | YES | GROSS TOTAL RESECTION (>90%) |
| 533.00 | UCSC Roma | 65.00 | M | 40.00  | OLIGODENDROGLIOMA III     |              | FRONTAL+TEMP   | YES | PARTIAL RESECTION (<90%)     |
| 534.00 | UCSC Roma | 42.00 | M | 90.00  | ASTROC III                | FRONTAL      | FRONTAL        | YES | PARTIAL RESECTION (<90%)     |
| 535.00 | UCSC Roma | 54.00 | F | 40.00  | GBM                       | TEMPORAL     | TEMPORAL       | YES | PARTIAL RESECTION (<90%)     |
| 536.00 | UCSC Roma | 67.00 | M | 100.00 | OTHER (ATIPIC MENINGIOMI) | PARIETAL     | PARIETAL       | YES | GROSS TOTAL RESECTION (>90%) |
| 537.00 | UCSC Roma | 59.00 | M | 50.00  | GBM                       | PARIETAL     | PARIETAL       | YES | PARTIAL RESECTION (<90%)     |
| 538.00 | UCSC Roma | 61.00 | M | 40.00  | ASTROC III                | TEMPORAL     | TEMPORAL       | YES | PARTIAL RESECTION (<90%)     |
| 539.00 | UCSC Roma | 41.00 | M | 80.00  | OLIGOASTROCITOMA II       | FRONTAL      | FRONTAL        | YES | GROSS TOTAL RESECTION (>90%) |
| 540.00 | UCSC Roma | 46.00 | F | 30.00  | GBM                       | FRONTAL      | FRONTAL        | YES | PARTIAL RESECTION (<90%)     |
| 541.00 | UCSC Roma | 47.00 | F | 90.00  | METASTASES                | FRONTAL      | FRONTAL        | YES | GROSS TOTAL RESECTION (>90%) |
| 542.00 | UCSC Roma | 55.00 | F | 100.00 | ASTROC III                |              | TEMPORAL+OCCI  | YES | PARTIAL RESECTION (<90%)     |
| 543.00 | UCSC Roma | 46.00 | M | 90.00  | OLIGOASTROCITOMA III      | FRONTAL      | FRONTAL        | YES | GROSS TOTAL RESECTION (>90%) |

|        |              |       |   |        |                           |              |               |     |                              |
|--------|--------------|-------|---|--------|---------------------------|--------------|---------------|-----|------------------------------|
| 544.00 | UCSC Roma    | 70.00 | F | 20.00  | GBM                       | FRONTAL      | FRONTAL       | YES | PARTIAL RESECTION (<90%)     |
| 545.00 | UCSC Roma    | 77.00 | M | 70.00  | GBM                       | FRONTAL      | FRONTAL       | YES | PARTIAL RESECTION (<90%)     |
| 546.00 | UCSC Roma    | 44.00 | M | 50.00  | ASTROC III                | PARIETAL     | PARIETAL      | YES | PARTIAL RESECTION (<90%)     |
| 547.00 | UCSC Roma    | 65.00 | F | 80.00  | METASTASES                |              | CEREBELLAR    | NO  |                              |
| 548.00 | UCSC Roma    | 75.00 | M | 50.00  | ASTROC III                | TEMPORAL     | TEMPORAL      | YES | PARTIAL RESECTION (<90%)     |
| 549.00 | UCSC Roma    | 61.00 | F | 40.00  | GBM                       | FRONTAL      | FRONTAL       | YES | PARTIAL RESECTION (<90%)     |
| 550.00 | UCSC Roma    | 60.00 | M | 70.00  | OLIGOASTROCITOMA II       | FRONTAL      | FRONTAL       | YES | GROSS TOTAL RESECTION (>90%) |
| 551.00 | UCSC Roma    | 28.00 | F | 80.00  | ASTROC III                |              | TEMPORAL+INSU | YES | PARTIAL RESECTION (<90%)     |
| 552.00 | UCSC Roma    | 79.00 | F | 40.00  | GBM                       | FRONTAL      | FRONTAL       | YES | PARTIAL RESECTION (<90%)     |
| 553.00 | UCSC Roma    | 42.00 | M | 90.00  | OLIGODENDROGLIOMA III     | FRONTAL      | FRONTAL       | YES | PARTIAL RESECTION (<90%)     |
| 554.00 | UCSC Roma    | 63.00 | M | 30.00  | ASTROC III                | FRONTAL      | FRONTAL       | YES | PARTIAL RESECTION (<90%)     |
| 555.00 | UCSC Roma    | 59.00 | F | 80.00  | ASTROC III                | FRONTAL      | FRONTAL       | YES | BIOPSY                       |
| 556.00 | UCSC Roma    | 33.00 | M | 90.00  | OLIGOASTROCITOMA II       | FRONTAL      | FRONTAL       | YES | PARTIAL RESECTION (<90%)     |
| 557.00 | UCSC Roma    | 72.00 | M | 20.00  |                           | BILATERAL    | MULTICENTRIC  | NO  |                              |
| 558.00 | UCSC Roma    | 23.00 | F | 80.00  | OLIGODENDROGLIOMA III     | PARIETAL     | PARIETAL      | YES | GROSS TOTAL RESECTION (>90%) |
| 559.00 | UCSC Roma    | 22.00 | M | 90.00  | OTHER (ATIPIC MENINGIOMI) | MULTILOBULAR | MULTICENTRIC  | YES | GROSS TOTAL RESECTION (>90%) |
| 560.00 | UCSC Roma    | 54.00 | M | 60.00  | OLIGOASTROCITOMA III      | MULTICENTRIC | MULTICENTRIC  | YES | BIOPSY                       |
| 561.00 | UCSC Roma    | 72.00 | F | 60.00  | GBM                       | TEMPORAL     | TEMPORAL      | YES | BIOPSY                       |
| 562.00 | UCSC Roma    | 68.00 | F | 60.00  | GBM                       | FRONTAL      | FRONTAL       | YES | GROSS TOTAL RESECTION (>90%) |
| 563.00 | UCSC Roma    | 51.00 | F | 70.00  | GBM                       | TEMPORAL     | TEMPORAL      | YES | GROSS TOTAL RESECTION (>90%) |
| 564.00 | UCSC Roma    | 52.00 | F | 70.00  | GBM                       | TEMPORAL     | TEMPORAL      | YES | GROSS TOTAL RESECTION (>90%) |
| 565.00 | UCSC Roma    | 59.00 | M | 70.00  |                           | FRONTAL      | FRONTAL       | NO  |                              |
| 566.00 | UCSC Roma    | 65.00 | F | 70.00  | GBM                       | FRONTAL      | FRONTAL       | YES | GROSS TOTAL RESECTION (>90%) |
| 567.00 | UCSC Roma    | 39.00 | F | 70.00  | GBM                       | FRONTAL      | FRONTAL       | YES | PARTIAL RESECTION (<90%)     |
| 568.00 | MILANO-BESTA | 42.00 | M | 60.00  | GBM                       | FRONTAL      | FRONTAL       | YES | PARTIAL RESECTION (<90%)     |
| 569.00 | MILANO-BESTA | 43.00 | M | 100.00 | OLIGOASTROCITOMA II       | MULTILOBULAR | MULTICENTRIC  | YES | GROSS TOTAL RESECTION (>90%) |
| 570.00 | MILANO-BESTA | 53.00 | F | 50.00  | OLIGOASTROCITOMA III      | FRONTAL      | FRONTAL       | YES | GROSS TOTAL RESECTION (>90%) |
| 571.00 | MILANO-BESTA | 55.00 | F | 90.00  | GBM                       | FRONTAL      | FRONTAL       | YES | BIOPSY                       |
| 572.00 | MILANO-BESTA | 51.00 | M | 80.00  | GBM                       | FRONTAL      | FRONTAL       | YES | PARTIAL RESECTION (<90%)     |
| 573.00 | MILANO-BESTA | 56.00 | F | 100.00 | OLIGOASTROCITOMA III      | FRONTAL      | FRONTAL       | YES | GROSS TOTAL RESECTION (>90%) |
| 574.00 | MILANO-BESTA | 37.00 | M | 60.00  | OLIGOASTROCITOMA III      | TEMPORAL     | TEMPORAL      | YES | PARTIAL RESECTION (<90%)     |
| 575.00 | MILANO-BESTA | 25.00 | F | 80.00  | OLIGOASTROCITOMA III      | FRONTAL      | FRONTAL       | YES | GROSS TOTAL RESECTION (>90%) |
| 576.00 | MILANO-BESTA | 32.00 | M | 80.00  |                           | TEMPORAL     | TEMPORAL      | YES | GROSS TOTAL RESECTION (>90%) |
| 577.00 | MILANO-BESTA | 39.00 | M | 100.00 | OLIGOASTROCITOMA III      | FRONTAL      | FRONTAL       | YES | GROSS TOTAL RESECTION (>90%) |
| 578.00 | MILANO-BESTA | 50.00 | F | 60.00  | GBM                       | MULTICENTRIC | MULTICENTRIC  | YES | GROSS TOTAL RESECTION (>90%) |
| 579.00 | MILANO-BESTA | 90.00 | F | 49.00  | OLIGOASTROCITOMA II       | FRONTAL      | FRONTAL       | YES | GROSS TOTAL RESECTION (>90%) |
| 580.00 | MILANO-BESTA | 33.00 | F | 90.00  | GBM                       | TEMPORAL     | TEMPORAL      | YES | PARTIAL RESECTION (<90%)     |
| 581.00 | MILANO-BESTA | 67.00 | M | 70.00  | GBM                       | FRONTAL      | FRONTAL       | YES | GROSS TOTAL RESECTION (>90%) |
| 582.00 | MILANO-BESTA | 34.00 | M | 80.00  | GBM                       | BILATERAL    | MULTICENTRIC  | YES | PARTIAL RESECTION (<90%)     |
| 583.00 | MILANO-BESTA | 38.00 | M | 90.00  | OLIGOASTROCITOMA III      | FRONTAL      | FRONTAL       | YES | GROSS TOTAL RESECTION (>90%) |
| 584.00 | MILANO-BESTA | 69.00 | M | 60.00  | ASTROC III                | PARIETAL     | PARIETAL      | YES |                              |
| 585.00 | MILANO-BESTA | 55.00 | M | 60.00  | OTHER (ATIPIC MENINGIOMI) | MULTILOBULAR | MULTICENTRIC  | YES | PARTIAL RESECTION (<90%)     |

|        |              |       |   |        |                           |              |              |     |                            |
|--------|--------------|-------|---|--------|---------------------------|--------------|--------------|-----|----------------------------|
| 586.00 | MILANO-BESTA | 64.00 | M | 50.00  | ASTROC III                | TEMPORAL     | TEMPORAL     | YES | GROSS TOTAL RESECTION (>90 |
| 587.00 | MILANO-BESTA | 49.00 | M | 60.00  | ASTROC III                | MULTILOBULAR | MULTICENTRIC | YES | PARTIAL RESECTION (<90%)   |
| 588.00 | MILANO-BESTA | 49.00 | M | 60.00  | GBM                       | MULTICENTRIC | MULTICENTRIC | YES | GROSS TOTAL RESECTION (>90 |
| 589.00 | MILANO-BESTA | 36.00 | M | 100.00 | GBM                       | FRONTAL      | FRONTAL      | YES | GROSS TOTAL RESECTION (>90 |
| 590.00 | MILANO-BESTA | 39.00 | M | 50.00  | GBM                       | FRONTAL      | FRONTAL      | YES | GROSS TOTAL RESECTION (>90 |
| 591.00 | MILANO-BESTA | 45.00 | M | 80.00  | GBM                       | TEMPORAL     | TEMPORAL     | YES | GROSS TOTAL RESECTION (>90 |
| 592.00 | MILANO-BESTA | 46.00 | M | 100.00 | GBM                       | TEMPORAL     | TEMPORAL     | YES | PARTIAL RESECTION (<90%)   |
| 593.00 | MILANO-BESTA | 30.00 | F | 70.00  | GBM                       | FRONTAL      | FRONTAL      | YES | GROSS TOTAL RESECTION (>90 |
| 594.00 | MILANO-BESTA | 64.00 | M | 60.00  | GBM                       | MULTILOBULAR | MULTICENTRIC | YES | GROSS TOTAL RESECTION (>90 |
| 595.00 | MILANO-BESTA | 52.00 | M | 40.00  | ASTRO II                  | FRONTAL      | FRONTAL      | YES | GROSS TOTAL RESECTION (>90 |
| 596.00 | MILANO-BESTA | 37.00 | M | 80.00  | OLIGODENDROGLIOMA III     | FRONTAL      | FRONTAL      | YES | GROSS TOTAL RESECTION (>90 |
| 597.00 | MILANO-BESTA | 62.00 | F | 80.00  | GBM                       | TEMPORAL     | TEMPORAL     | YES | GROSS TOTAL RESECTION (>90 |
| 598.00 | MILANO-BESTA | 48.00 | F | 50.00  | GBM                       | MULTILOBULAR | MULTICENTRIC | YES | PARTIAL RESECTION (<90%)   |
| 599.00 | MILANO-BESTA | 63.00 | M | 50.00  | GBM                       | FRONTAL      | FRONTAL      | YES | PARTIAL RESECTION (<90%)   |
| 600.00 | MILANO-BESTA | 56.00 | F | 40.00  | METASTASES                | MULTICENTRIC | MULTICENTRIC | YES | PARTIAL RESECTION (<90%)   |
| 601.00 | MILANO-BESTA | 71.00 | M | 90.00  | GBM                       | TEMPORAL     | TEMPORAL     | YES | GROSS TOTAL RESECTION (>90 |
| 602.00 | MILANO-BESTA | 37.00 | M | 80.00  | GBM                       | MULTILOBULAR | MULTICENTRIC | YES | GROSS TOTAL RESECTION (>90 |
| 603.00 | MILANO-BESTA | 43.00 | M |        | GBM                       | MULTILOBULAR | MULTICENTRIC | YES | GROSS TOTAL RESECTION (>90 |
| 604.00 | MILANO-BESTA | 61.00 | M | 80.00  | GBM                       | FRONTAL      | FRONTAL      | YES | GROSS TOTAL RESECTION (>90 |
| 605.00 | MILANO-BESTA | 30.00 | F | 90.00  | OLIGOASTROCITOMA II       | TEMPORAL     | TEMPORAL     | YES | GROSS TOTAL RESECTION (>90 |
| 606.00 | MILANO-BESTA | 59.00 | M | 50.00  | GBM                       | FRONTAL      | FRONTAL      | YES | GROSS TOTAL RESECTION (>90 |
| 607.00 | MILANO-BESTA | 29.00 | M | 100.00 | OLIGOASTROCITOMA II       | FRONTAL      | FRONTAL      | YES | PARTIAL RESECTION (<90%)   |
| 608.00 | MILANO-BESTA | 71.00 | M | 60.00  | GBM                       | TEMPORAL     | TEMPORAL     | YES | GROSS TOTAL RESECTION (>90 |
| 609.00 | MILANO-BESTA | 60.00 | F | 90.00  | GBM                       | MULTILOBULAR | MULTICENTRIC | YES | GROSS TOTAL RESECTION (>90 |
| 610.00 | MILANO-BESTA | 68.00 | M | 40.00  | OLIGODENDROGLIOMA III     | TEMPORAL     | TEMPORAL     | YES | GROSS TOTAL RESECTION (>90 |
| 611.00 | MILANO-BESTA | 68.00 | M | 60.00  | GBM                       | MULTILOBULAR | MULTICENTRIC | YES | GROSS TOTAL RESECTION (>90 |
| 612.00 | MILANO-BESTA | 45.00 | M | 60.00  | GBM                       | TEMPORAL     | TEMPORAL     | YES | GROSS TOTAL RESECTION (>90 |
| 613.00 | MILANO-BESTA | 61.00 | M | 50.00  | GBM                       | TEMPORAL     | TEMPORAL     | YES | GROSS TOTAL RESECTION (>90 |
| 614.00 | MILANO-BESTA | 69.00 | M | 70.00  | GBM                       | TEMPORAL     | TEMPORAL     | YES | GROSS TOTAL RESECTION (>90 |
| 615.00 | MILANO-BESTA | 52.00 | F | 60.00  | GBM                       | MULTILOBULAR | MULTICENTRIC | YES | GROSS TOTAL RESECTION (>90 |
| 616.00 | MILANO-BESTA | 68.00 | M | 40.00  | GBM                       | MULTICENTRIC | MULTICENTRIC | YES | PARTIAL RESECTION (<90%)   |
| 617.00 | MILANO-BESTA | 37.00 | F | 90.00  | OLIGODENDROGLIOMA II      | TEMPORAL     | TEMPORAL     | YES | GROSS TOTAL RESECTION (>90 |
| 618.00 | MILANO-BESTA | 64.00 | M | 50.00  | METASTASES                | TEMPORAL     | TEMPORAL     | YES | GROSS TOTAL RESECTION (>90 |
| 619.00 | MILANO-BESTA | 30.00 | F | 100.00 | OLIGODENDROGLIOMA II      | FRONTAL      | FRONTAL      | YES | GROSS TOTAL RESECTION (>90 |
| 620.00 | MILANO-BESTA | 52.00 | F | 100.00 | ASTRO II                  | TEMPORAL     | TEMPORAL     | YES | PARTIAL RESECTION (<90%)   |
| 621.00 | MILANO-BESTA | 27.00 | F | 100.00 | OLIGODENDROGLIOMA II      | FRONTAL      | FRONTAL      | YES | GROSS TOTAL RESECTION (>90 |
| 622.00 | MILANO-BESTA | 55.00 | M | 70.00  | OLIGOASTROCITOMA III      | FRONTAL      | FRONTAL      | YES | GROSS TOTAL RESECTION (>90 |
| 623.00 | MILANO-BESTA | 71.00 | F | 60.00  | GBM                       | MULTICENTRIC | MULTICENTRIC | YES | PARTIAL RESECTION (<90%)   |
| 624.00 | MILANO-BESTA | 57.00 | M | 100.00 | GBM                       | TEMPORAL     | TEMPORAL     | YES | GROSS TOTAL RESECTION (>90 |
| 625.00 | MILANO-BESTA | 37.00 | M | 100.00 | OLIGODENDROGLIOMA II      | FRONTAL      | FRONTAL      | YES | GROSS TOTAL RESECTION (>90 |
| 626.00 | MILANO-BESTA | 21.00 | F | 30.00  | OTHER (ATIPIC MENINGIOMI) | MULTILOBULAR | MULTICENTRIC | YES | GROSS TOTAL RESECTION (>90 |
| 627.00 | MILANO-BESTA | 23.00 | M | 100.00 | OLIGODENDROGLIOMA II      | INSULA       | INSULA       | YES | GROSS TOTAL RESECTION (>90 |

|        |              |       |   |        |                           |              |              |     |                             |
|--------|--------------|-------|---|--------|---------------------------|--------------|--------------|-----|-----------------------------|
| 628.00 | MILANO-BESTA | 19.00 | F | 90.00  | OLIGOASTROCITOMA III      | MULTILOBULAR | MULTICENTRIC | YES | PARTIAL RESECTION (<90%)    |
| 629.00 | MILANO-BESTA | 58.00 | M | 30.00  | GBM                       | MULTILOBULAR | MULTICENTRIC | YES | PARTIAL RESECTION (<90%)    |
| 630.00 | MILANO-BESTA | 47.00 | F | 90.00  | OTHER (ATIPIC MENINGIOMI) | FRONTAL      | FRONTAL      | YES | PARTIAL RESECTION (<90%)    |
| 631.00 | MILANO-BESTA | 59.00 | F | 60.00  | OLIGOASTROCITOMA III      | MULTICENTRIC | MULTICENTRIC | YES | PARTIAL RESECTION (<90%)    |
| 632.00 | MILANO-BESTA | 37.00 | M | 80.00  | OLIGOASTROCITOMA III      | TEMPORAL     | TEMPORAL     | YES | PARTIAL RESECTION (<90%)    |
| 633.00 | MILANO-BESTA | 41.00 | M | 90.00  | OLIGOASTROCITOMA III      | FRONTAL      | FRONTAL      | YES | GROSS TOTAL RESECTION (>90) |
| 634.00 | MILANO-BESTA | 47.00 | M | 100.00 | OLIGOASTROCITOMA II       | FRONTAL      | FRONTAL      | YES | GROSS TOTAL RESECTION (>90) |
| 635.00 | MILANO-BESTA | 57.00 | F | 100.00 | OLIGOASTROCITOMA III      | FRONTAL      | FRONTAL      | YES | GROSS TOTAL RESECTION (>90) |
| 636.00 | MILANO-BESTA | 53.00 | M | 70.00  | OTHER (ATIPIC MENINGIOMI) | FRONTAL      | FRONTAL      | YES | PARTIAL RESECTION (<90%)    |
| 637.00 | MILANO-BESTA | 55.00 | F | 90.00  | OTHER (ATIPIC MENINGIOMI) | MULTILOBULAR | MULTICENTRIC | YES | GROSS TOTAL RESECTION (>90) |
| 638.00 | MILANO-BESTA | 34.00 | F | 40.00  | OLIGOASTROCITOMA III      | TEMPORAL     | TEMPORAL     | YES | GROSS TOTAL RESECTION (>90) |
| 639.00 | MILANO-BESTA | 38.00 | M | 80.00  | OLIGOASTROCITOMA II       | FRONTAL      | FRONTAL      | YES | PARTIAL RESECTION (<90%)    |
| 640.00 | MILANO-BESTA | 63.00 | M | 100.00 | GBM                       | MULTILOBULAR | MULTICENTRIC | YES | PARTIAL RESECTION (<90%)    |
| 641.00 | MILANO-BESTA | 42.00 | M | 100.00 | OLIGOASTROCITOMA III      | MULTILOBULAR | MULTICENTRIC | YES | GROSS TOTAL RESECTION (>90) |
| 642.00 | MILANO-BESTA | 42.00 | M | 100.00 | OLIGOASTROCITOMA II       | FRONTAL      | FRONTAL      | YES | GROSS TOTAL RESECTION (>90) |
| 643.00 | MILANO-BESTA | 65.00 | M | 90.00  | ASTROC III                | FRONTAL      | FRONTAL      | YES | GROSS TOTAL RESECTION (>90) |
| 644.00 | MILANO-BESTA | 67.00 | M | 90.00  | OLIGOASTROCITOMA II       | FRONTAL      | FRONTAL      | YES | PARTIAL RESECTION (<90%)    |
| 645.00 | MILANO-BESTA | 73.00 | F | 60.00  | OTHER (ATIPIC MENINGIOMI) | FRONTAL      | FRONTAL      | YES | GROSS TOTAL RESECTION (>90) |
| 646.00 | MILANO-BESTA | 56.00 | F | 40.00  | METASTASES                | MULTILOBULAR | MULTICENTRIC | YES | PARTIAL RESECTION (<90%)    |
| 647.00 | MILANO-BESTA | 61.00 | F | 70.00  | GBM                       | MULTILOBULAR | MULTICENTRIC | YES | PARTIAL RESECTION (<90%)    |
| 648.00 | MILANO-BESTA | 37.00 | M | 90.00  | OLIGOASTROCITOMA II       | MULTILOBULAR | MULTICENTRIC | YES | PARTIAL RESECTION (<90%)    |
| 649.00 | MILANO-BESTA | 36.00 | M | 100.00 | OLIGOASTROCITOMA II       | FRONTAL      | FRONTAL      | YES | GROSS TOTAL RESECTION (>90) |
| 650.00 | MILANO-BESTA | 36.00 | M | 100.00 | OLIGOASTROCITOMA II       | FRONTAL      | FRONTAL      | YES | GROSS TOTAL RESECTION (>90) |
| 651.00 | MILANO-BESTA | 52.00 | M | 60.00  | GBM                       | MULTICENTRIC | MULTICENTRIC | YES | PARTIAL RESECTION (<90%)    |
| 652.00 | MILANO-BESTA | 33.00 | M | 100.00 | ASTROC III                | FRONTAL      | FRONTAL      | YES | GROSS TOTAL RESECTION (>90) |
| 653.00 | MILANO-BESTA | 38.00 | M | 100.00 | ASTROC III                | FRONTAL      | FRONTAL      | YES | GROSS TOTAL RESECTION (>90) |
| 654.00 | MILANO-BESTA | 36.00 | M | 100.00 | OLIGOASTROCITOMA II       | FRONTAL      | FRONTAL      | YES | PARTIAL RESECTION (<90%)    |
| 655.00 | MILANO-BESTA | 73.00 | F | 60.00  | GBM                       | TEMPORAL     | TEMPORAL     | YES | PARTIAL RESECTION (<90%)    |
| 656.00 | MILANO-BESTA | 22.00 | M | 60.00  | ASTROC III                | FRONTAL      | FRONTAL      | YES | GROSS TOTAL RESECTION (>90) |
| 657.00 | MILANO-BESTA | 74.00 | F | 70.00  | OLIGOASTROCITOMA III      | FRONTAL      | FRONTAL      | YES | GROSS TOTAL RESECTION (>90) |
| 658.00 | MILANO-BESTA | 65.00 | F | 100.00 | METASTASES                | TEMPORAL     | TEMPORAL     | YES | GROSS TOTAL RESECTION (>90) |
| 659.00 | MILANO-BESTA | 41.00 | M | 100.00 | ASTRO II                  | MULTILOBULAR | MULTICENTRIC | YES | PARTIAL RESECTION (<90%)    |
| 660.00 | MILANO-BESTA | 62.00 | F | 100.00 | OLIGODENDROGLIOMA III     | FRONTAL      | FRONTAL      | YES | GROSS TOTAL RESECTION (>90) |
| 661.00 | MILANO-BESTA | 62.00 | F | 100.00 | ASTRO II                  | MULTILOBULAR | MULTICENTRIC | YES | PARTIAL RESECTION (<90%)    |
| 662.00 | MILANO-BESTA | 62.00 | M | 80.00  | METASTASES                | PARIETAL     | PARIETAL     | YES | PARTIAL RESECTION (<90%)    |
| 663.00 | MILANO-BESTA | 49.00 | M | 100.00 | OLIGOASTROCITOMA II       | MULTILOBULAR | MULTICENTRIC | YES | PARTIAL RESECTION (<90%)    |
| 664.00 | MILANO-BESTA | 67.00 | M | 60.00  | GBM                       | TEMPORAL     | TEMPORAL     | YES | PARTIAL RESECTION (<90%)    |
| 665.00 | MILANO-BESTA | 68.00 | M | 100.00 | ASTROC III                | MULTILOBULAR | MULTICENTRIC | YES | PARTIAL RESECTION (<90%)    |
| 666.00 | MILANO-BESTA | 41.00 | F | 100.00 | OLIGODENDROGLIOMA II      | MULTILOBULAR | MULTICENTRIC | YES | PARTIAL RESECTION (<90%)    |
| 667.00 | MILANO-BESTA | 61.00 | M | 100.00 | ASTRO II                  | MULTILOBULAR | MULTICENTRIC | YES | PARTIAL RESECTION (<90%)    |
| 668.00 | MILANO-BESTA | 67.00 | M | 70.00  | METASTASES                | FRONTAL      | FRONTAL      | YES | PARTIAL RESECTION (<90%)    |
| 669.00 | MILANO-BESTA | 55.00 | F | 70.00  | ASTROC III                | BILATERAL    | MULTICENTRIC | YES | BIOPSY                      |



|        |              |       |   |        |                           |              |              |     |                             |
|--------|--------------|-------|---|--------|---------------------------|--------------|--------------|-----|-----------------------------|
| 670.00 | MILANO-BESTA | 56.00 | F | 80.00  | GBM                       | PARIETAL     | PARIETAL     | YES | PARTIAL RESECTION (<90%)    |
| 671.00 | MILANO-BESTA | 57.00 | M | 60.00  | OTHER (ATIPIC MENINGIOMI) | TEMPORAL     | TEMPORAL     | YES | PARTIAL RESECTION (<90%)    |
| 672.00 | MILANO-BESTA | 57.00 | M | 100.00 | ASTROC III                | MULTICENTRIC | MULTICENTRIC | YES | PARTIAL RESECTION (<90%)    |
| 673.00 | MILANO-BESTA | 41.00 | F | 100.00 | GBM                       | FRONTAL      | FRONTAL      | YES | GROSS TOTAL RESECTION (>90) |
| 674.00 | MILANO-BESTA | 69.00 | F | 100.00 | METASTASES                | FRONTAL      | FRONTAL      | YES | GROSS TOTAL RESECTION (>90) |
| 675.00 | MILANO-BESTA | 27.00 | M | 90.00  | ASTRO II                  | FRONTAL      | FRONTAL      | YES | GROSS TOTAL RESECTION (>90) |
| 676.00 | MILANO-BESTA | 69.00 | M | 40.00  | GBM                       | MULTILOBULAR | MULTICENTRIC | YES | PARTIAL RESECTION (<90%)    |
| 677.00 | MILANO-BESTA | 34.00 | F | 90.00  | OLIGODENDROGLIOMA II      | FRONTAL      | FRONTAL      | YES | BIOPSY                      |
| 678.00 | MILANO-BESTA | 65.00 | M | 80.00  | GBM                       | MULTILOBULAR | MULTICENTRIC | YES | PARTIAL RESECTION (<90%)    |
| 679.00 | MILANO-BESTA | 57.00 | F | 40.00  | METASTASES                | MULTICENTRIC | MULTICENTRIC | YES | GROSS TOTAL RESECTION (>90) |
| 680.00 | MILANO-BESTA | 51.00 | F | 50.00  | OLIGOASTROCITOMA III      | TEMPORAL     | TEMPORAL     | YES | GROSS TOTAL RESECTION (>90) |
| 681.00 | MILANO-BESTA | 63.00 | M | 40.00  | OTHER (ATIPIC MENINGIOMI) | MULTICENTRIC | MULTICENTRIC | YES | PARTIAL RESECTION (<90%)    |
| 682.00 | MILANO-BESTA | 76.00 | M | 100.00 | OLIGOASTROCITOMA II       | TEMPORAL     | TEMPORAL     | YES | GROSS TOTAL RESECTION (>90) |
| 683.00 | MILANO-BESTA | 36.00 | F | 100.00 | OLIGOASTROCITOMA II       | BILATERAL    | MULTICENTRIC | YES | PARTIAL RESECTION (<90%)    |
| 684.00 | MILANO-BESTA | 55.00 | M | 100.00 | GBM                       | TEMPORAL     | TEMPORAL     | YES | PARTIAL RESECTION (<90%)    |
| 685.00 | MILANO-BESTA | 66.00 | F | 40.00  | GBM                       | TEMPORAL     | TEMPORAL     | YES | PARTIAL RESECTION (<90%)    |
| 686.00 | MILANO-BESTA | 39.00 | M | 80.00  | GBM                       | FRONTAL      | FRONTAL      | YES | PARTIAL RESECTION (<90%)    |
| 687.00 | MILANO-BESTA | 49.00 | M | 70.00  | OLIGOASTROCITOMA III      | FRONTAL      | FRONTAL      | YES | PARTIAL RESECTION (<90%)    |
| 688.00 | MILANO-BESTA | 76.00 | M | 60.00  | GBM                       | FRONTAL      | FRONTAL      | YES | PARTIAL RESECTION (<90%)    |
| 689.00 | MILANO-BESTA | 76.00 | M | 90.00  | OLIGODENDROGLIOMA III     | TEMPORAL     | TEMPORAL     | YES | GROSS TOTAL RESECTION (>90) |
| 690.00 | MILANO-BESTA | 42.00 | M | 100.00 | OLIGOASTROCITOMA III      | FRONTAL      | FRONTAL      | YES | PARTIAL RESECTION (<90%)    |
| 691.00 | MILANO-BESTA | 57.00 | F | 80.00  | GBM                       | MULTILOBULAR | MULTICENTRIC | YES | PARTIAL RESECTION (<90%)    |
| 692.00 | MILANO-BESTA | 42.00 | M | 100.00 |                           | FRONTAL      | FRONTAL      | YES | GROSS TOTAL RESECTION (>90) |
| 693.00 | MILANO-BESTA | 63.00 | F | 60.00  | OTHER (ATIPIC MENINGIOMI) | TEMPORAL     | TEMPORAL     | YES | GROSS TOTAL RESECTION (>90) |
| 694.00 | MILANO-BESTA | 71.00 | F | 70.00  | GBM                       | FRONTAL      | FRONTAL      | YES | GROSS TOTAL RESECTION (>90) |
| 695.00 | MILANO-BESTA | 47.00 | M | 90.00  | GBM                       | BILATERAL    | MULTICENTRIC | YES | PARTIAL RESECTION (<90%)    |
| 696.00 | MILANO-BESTA | 53.00 | M | 100.00 | GBM                       | FRONTAL      | FRONTAL      | YES | GROSS TOTAL RESECTION (>90) |
| 697.00 | MILANO-BESTA | 49.00 | M | 60.00  | GBM                       | MULTILOBULAR | MULTICENTRIC | YES | GROSS TOTAL RESECTION (>90) |
| 698.00 | MILANO-BESTA | 70.00 | F | 100.00 | GBM                       | TEMPORAL     | TEMPORAL     | YES | GROSS TOTAL RESECTION (>90) |
| 699.00 | MILANO-BESTA | 40.00 | F | 90.00  | ASTROC III                | MULTILOBULAR | MULTICENTRIC | YES | PARTIAL RESECTION (<90%)    |
| 700.00 | MILANO-BESTA | 41.00 | F | 70.00  | OLIGOASTROCITOMA III      | MULTILOBULAR | MULTICENTRIC | YES | GROSS TOTAL RESECTION (>90) |
| 701.00 | MILANO-BESTA | 73.00 | F | 100.00 | GBM                       | TEMPORAL     | TEMPORAL     | YES | GROSS TOTAL RESECTION (>90) |
| 702.00 | MILANO-BESTA | 58.00 | M | 70.00  | GBM                       | FRONTAL      | FRONTAL      | YES | PARTIAL RESECTION (<90%)    |
| 703.00 | MILANO-BESTA | 23.00 | M | 100.00 | OLIGODENDROGLIOMA II      | TEMPORAL     | TEMPORAL     | YES | GROSS TOTAL RESECTION (>90) |
| 704.00 | MILANO-BESTA | 60.00 | F | 70.00  | GBM                       | TEMPORAL     | TEMPORAL     | YES | PARTIAL RESECTION (<90%)    |
| 705.00 | MILANO-BESTA | 48.00 | M | 60.00  | GBM                       | FRONTAL      | FRONTAL      | YES | PARTIAL RESECTION (<90%)    |
| 706.00 | MILANO-BESTA | 55.00 | M | 50.00  | GBM                       | FRONTAL      | FRONTAL      | YES | PARTIAL RESECTION (<90%)    |
| 707.00 | MILANO-BESTA | 69.00 | M | 100.00 | OLIGODENDROGLIOMA II      | TEMPORAL     | TEMPORAL     | YES | GROSS TOTAL RESECTION (>90) |
| 708.00 | MILANO-BESTA | 49.00 | M | 60.00  | GBM                       | BILATERAL    | MULTICENTRIC | YES | GROSS TOTAL RESECTION (>90) |
| 709.00 | MILANO-BESTA | 66.00 | F | 70.00  | GBM                       | TEMPORAL     | TEMPORAL     | YES | GROSS TOTAL RESECTION (>90) |
| 710.00 | MILANO-BESTA | 67.00 | M | 90.00  | GBM                       | FRONTAL      | FRONTAL      | YES | PARTIAL RESECTION (<90%)    |
| 711.00 | MILANO-BESTA | 45.00 | M | 70.00  | GBM                       | MULTICENTRIC | MULTICENTRIC | YES | PARTIAL RESECTION (<90%)    |

|        |              |       |   |        |                           |              |              |     |                            |
|--------|--------------|-------|---|--------|---------------------------|--------------|--------------|-----|----------------------------|
| 712.00 | MILANO-BESTA | 53.00 | F | 100.00 | OLIGODENDROGLIOMA II      | FRONTAL      | FRONTAL      | YES | GROSS TOTAL RESECTION (>90 |
| 713.00 | MILANO-BESTA | 59.00 | F | 50.00  | GBM                       | MULTILOBULAR | MULTICENTRIC | YES | PARTIAL RESECTION (<90%)   |
| 714.00 | MILANO-BESTA | 38.00 | M | 100.00 | OLIGOASTROCITOMA II       | FRONTAL      | FRONTAL      | YES | PARTIAL RESECTION (<90%)   |
| 715.00 | MILANO-BESTA | 51.00 | M | 100.00 | OLIGOASTROCITOMA II       | MULTILOBULAR | MULTICENTRIC | YES | GROSS TOTAL RESECTION (>90 |
| 716.00 | MILANO-BESTA | 76.00 | M | 40.00  | OTHER (ATIPIC MENINGIOMI) | MULTICENTRIC | MULTICENTRIC | YES | GROSS TOTAL RESECTION (>90 |
| 717.00 | MILANO-BESTA | 57.00 | F | 80.00  | GBM                       | TEMPORAL     | TEMPORAL     | YES | GROSS TOTAL RESECTION (>90 |
| 718.00 | MILANO-BESTA | 44.00 | M | 70.00  | OTHER (ATIPIC MENINGIOMI) | MULTILOBULAR | MULTICENTRIC | YES | PARTIAL RESECTION (<90%)   |
| 719.00 | MILANO-BESTA | 41.00 | F | 100.00 | OLIGOASTROCITOMA II       | MULTILOBULAR | MULTICENTRIC | YES | PARTIAL RESECTION (<90%)   |
| 720.00 | MILANO-BESTA | 39.00 | F | 100.00 | METASTASES                | MULTILOBULAR | MULTICENTRIC | YES | GROSS TOTAL RESECTION (>90 |
| 721.00 | MILANO-BESTA | 68.00 | M | 90.00  | OLIGOASTROCITOMA II       | MULTILOBULAR | MULTICENTRIC | YES | PARTIAL RESECTION (<90%)   |
| 722.00 | MILANO-BESTA | 22.00 | M | 100.00 | OLIGOASTROCITOMA III      | MULTILOBULAR | MULTICENTRIC | YES | PARTIAL RESECTION (<90%)   |
| 723.00 | MILANO-BESTA | 38.00 | F | 90.00  | GBM                       | MULTILOBULAR | MULTICENTRIC | YES | PARTIAL RESECTION (<90%)   |
| 724.00 | MILANO-BESTA | 55.00 | M | 60.00  | GBM                       | MULTILOBULAR | MULTICENTRIC | YES | PARTIAL RESECTION (<90%)   |
| 725.00 | MILANO-BESTA | 44.00 | F | 80.00  | GBM                       | PARIETAL     | PARIETAL     | YES | GROSS TOTAL RESECTION (>90 |
| 726.00 | MILANO-BESTA | 49.00 | M | 90.00  | ASTROC III                | BILATERAL    | MULTICENTRIC | YES | PARTIAL RESECTION (<90%)   |
| 727.00 | MILANO-BESTA | 34.00 | F | 100.00 | OLIGOASTROCITOMA II       | MULTILOBULAR | MULTICENTRIC | YES | GROSS TOTAL RESECTION (>90 |
| 728.00 | MILANO-BESTA | 35.00 | M | 100.00 | OLIGOASTROCITOMA II       | PARIETAL     | PARIETAL     | YES | GROSS TOTAL RESECTION (>90 |
| 729.00 | MILANO-BESTA | 72.00 | M | 100.00 | GBM                       | MULTICENTRIC | MULTICENTRIC | YES | GROSS TOTAL RESECTION (>90 |
| 730.00 | MILANO-BESTA | 56.00 | F | 80.00  | OLIGOASTROCITOMA II       | MULTILOBULAR | MULTICENTRIC | YES | GROSS TOTAL RESECTION (>90 |
| 731.00 | MILANO-BESTA | 59.00 | M | 100.00 | GBM                       | TEMPORAL     | TEMPORAL     | YES | GROSS TOTAL RESECTION (>90 |
| 732.00 | MILANO-BESTA | 52.00 | M | 70.00  | GBM                       | FRONTAL      | FRONTAL      | YES | GROSS TOTAL RESECTION (>90 |
| 733.00 | MILANO-BESTA | 76.00 | M | 70.00  | GBM                       | MULTILOBULAR | MULTICENTRIC | YES | GROSS TOTAL RESECTION (>90 |
| 734.00 | MILANO-BESTA | 39.00 | F | 50.00  | ASTROC III                | MULTILOBULAR | MULTICENTRIC | YES | PARTIAL RESECTION (<90%)   |
| 735.00 | MILANO-BESTA | 21.00 | M | 80.00  | GBM                       | FRONTAL      | FRONTAL      | YES | GROSS TOTAL RESECTION (>90 |
| 736.00 | MILANO-BESTA | 39.00 | F | 100.00 | ASTROC III                | INSULA       | INSULA       | YES | GROSS TOTAL RESECTION (>90 |
| 737.00 | MILANO-BESTA | 69.00 | F | 70.00  | OLIGODENDROGLIOMA II      | FRONTAL      | FRONTAL      | YES | PARTIAL RESECTION (<90%)   |
| 738.00 | MILANO-BESTA | 40.00 | F |        | OLIGOASTROCITOMA III      | FRONTAL      | FRONTAL      | YES | GROSS TOTAL RESECTION (>90 |
| 739.00 | MILANO-BESTA | 60.00 | M | 80.00  | OLIGODENDROGLIOMA II      | MULTILOBULAR | MULTICENTRIC | YES | GROSS TOTAL RESECTION (>90 |
| 740.00 | MILANO-BESTA | 73.00 | M | 90.00  | GBM                       | MULTILOBULAR | MULTICENTRIC | YES | GROSS TOTAL RESECTION (>90 |
| 741.00 | MILANO-BESTA | 64.00 | M | 80.00  | METASTASES                | FRONTAL      | FRONTAL      | YES | GROSS TOTAL RESECTION (>90 |
| 742.00 | MILANO-BESTA | 59.00 | M | 100.00 | METASTASES                | FRONTAL      | FRONTAL      | YES | GROSS TOTAL RESECTION (>90 |
| 743.00 | MILANO-BESTA | 63.00 | F | 60.00  | GBM                       | FRONTAL      | FRONTAL      | YES | PARTIAL RESECTION (<90%)   |
| 744.00 | MILANO-BESTA | 65.00 | M | 100.00 | OLIGOASTROCITOMA III      | PARIETAL     | PARIETAL     | YES | GROSS TOTAL RESECTION (>90 |
| 745.00 | MILANO-BESTA | 45.00 | F | 50.00  | OLIGOASTROCITOMA III      | MULTILOBULAR | MULTICENTRIC | YES | PARTIAL RESECTION (<90%)   |
| 746.00 | MILANO-BESTA | 51.00 | M | 100.00 | GBM                       | FRONTAL      | FRONTAL      | YES | PARTIAL RESECTION (<90%)   |
| 747.00 | MILANO-BESTA | 54.00 | M | 70.00  | GBM                       | PARIETAL     | PARIETAL     | YES | PARTIAL RESECTION (<90%)   |
| 748.00 | MILANO-BESTA | 42.00 | M | 80.00  | GBM                       | FRONTAL      | FRONTAL      | YES | GROSS TOTAL RESECTION (>90 |
| 749.00 | MILANO-BESTA | 69.00 | M | 60.00  | GBM                       | FRONTAL      | FRONTAL      | YES | PARTIAL RESECTION (<90%)   |
| 750.00 | MILANO-BESTA | 50.00 | M | 30.00  | GBM                       | FRONTAL      | FRONTAL      | YES | PARTIAL RESECTION (<90%)   |
| 751.00 | MILANO-BESTA | 62.00 | F | 90.00  | GBM                       | PARIETAL     | PARIETAL     | YES | GROSS TOTAL RESECTION (>90 |
| 752.00 | MILANO-BESTA | 32.00 | M | 100.00 | METASTASES                | MULTICENTRIC | MULTICENTRIC | YES | GROSS TOTAL RESECTION (>90 |
| 753.00 | MILANO-BESTA | 58.00 | M | 80.00  | GBM                       | FRONTAL      | FRONTAL      | YES | GROSS TOTAL RESECTION (>90 |

|        |              |       |   |        |                           |              |              |     |                            |
|--------|--------------|-------|---|--------|---------------------------|--------------|--------------|-----|----------------------------|
| 754.00 | MILANO-BESTA | 70.00 | M | 100.00 | GBM                       | OCCIPITAL    | OCCIPITAL    | YES | GROSS TOTAL RESECTION (>90 |
| 755.00 | MILANO-BESTA | 46.00 | M | 70.00  | ASTROC III                | BILATERAL    | MULTICENTRIC | YES | BIOPSY                     |
| 756.00 | MILANO-BESTA | 50.00 | M | 90.00  | GBM                       | TEMPORAL     | TEMPORAL     | YES | GROSS TOTAL RESECTION (>90 |
| 757.00 | MILANO-BESTA | 63.00 | M | 90.00  | METASTASES                | TEMPORAL     | TEMPORAL     | YES | GROSS TOTAL RESECTION (>90 |
| 758.00 | MILANO-BESTA | 42.00 | F | 100.00 | OLIGOASTROCITOMA III      | FRONTAL      | FRONTAL      | YES | GROSS TOTAL RESECTION (>90 |
| 759.00 | MILANO-BESTA | 59.00 | M | 50.00  | GBM                       | MULTILOBULAR | MULTICENTRIC | YES | GROSS TOTAL RESECTION (>90 |
| 760.00 | MILANO-BESTA | 70.00 | M | 80.00  | GBM                       | TEMPORAL     | TEMPORAL     | YES | GROSS TOTAL RESECTION (>90 |
| 761.00 | MILANO-BESTA | 69.00 | F | 70.00  | GBM                       | MULTILOBULAR | MULTICENTRIC | YES | GROSS TOTAL RESECTION (>90 |
| 762.00 | MILANO-BESTA | 52.00 | M | 60.00  | GBM                       | MULTILOBULAR | MULTICENTRIC | YES | GROSS TOTAL RESECTION (>90 |
| 763.00 | MILANO-BESTA | 75.00 | F | 40.00  | GBM                       | FRONTAL      | FRONTAL      | YES | GROSS TOTAL RESECTION (>90 |
| 764.00 | MILANO-BESTA | 61.00 | F | 90.00  | GBM                       | MULTILOBULAR | MULTICENTRIC | YES | GROSS TOTAL RESECTION (>90 |
| 765.00 | MILANO-BESTA | 72.00 | M | 80.00  | GBM                       | FRONTAL      | FRONTAL      | YES | GROSS TOTAL RESECTION (>90 |
| 766.00 | MILANO-BESTA | 55.00 | M | 100.00 | GBM                       | TEMPORAL     | TEMPORAL     | YES | GROSS TOTAL RESECTION (>90 |
| 767.00 | MILANO-BESTA | 73.00 | F | 90.00  | GBM                       | TEMPORAL     | TEMPORAL     | YES | GROSS TOTAL RESECTION (>90 |
| 768.00 | MILANO-BESTA | 45.00 | M | 80.00  | GBM                       | MULTILOBULAR | MULTICENTRIC | YES | GROSS TOTAL RESECTION (>90 |
| 769.00 | MILANO-BESTA | 61.00 | F | 80.00  | METASTASES                | FRONTAL      | FRONTAL      | YES | GROSS TOTAL RESECTION (>90 |
| 770.00 | MILANO-BESTA | 35.00 | F | 100.00 | OTHER (ATIPIC MENINGIOMI) | FRONTAL      | FRONTAL      | YES | GROSS TOTAL RESECTION (>90 |
| 771.00 | MILANO-BESTA | 56.00 | M | 70.00  | GBM                       | MULTILOBULAR | MULTICENTRIC | YES | GROSS TOTAL RESECTION (>90 |
| 772.00 | MILANO-BESTA | 61.00 | F | 80.00  | GBM                       | FRONTAL      | FRONTAL      | YES | GROSS TOTAL RESECTION (>90 |
| 773.00 | MILANO-BESTA | 36.00 | M | 90.00  | OLIGOASTROCITOMA II       | FRONTAL      | FRONTAL      | YES | GROSS TOTAL RESECTION (>90 |
| 774.00 | MILANO-BESTA | 56.00 | F | 70.00  | METASTASES                | MULTILOBULAR | MULTICENTRIC | YES | GROSS TOTAL RESECTION (>90 |
| 775.00 | MILANO-BESTA | 63.00 | F | 60.00  | GBM                       | TEMPORAL     | TEMPORAL     | YES | GROSS TOTAL RESECTION (>90 |
| 776.00 | MILANO-BESTA | 73.00 | M | 60.00  | GBM                       | MULTILOBULAR | MULTICENTRIC | YES | GROSS TOTAL RESECTION (>90 |
| 777.00 | MILANO-BESTA | 57.00 | F | 30.00  | GBM                       | FRONTAL      | FRONTAL      | YES | GROSS TOTAL RESECTION (>90 |
| 778.00 | MILANO-BESTA | 58.00 | M | 80.00  | METASTASES                | PARIETAL     | PARIETAL     | YES | GROSS TOTAL RESECTION (>90 |
| 779.00 | MILANO-BESTA | 52.00 | M | 60.00  | GBM                       | FRONTAL      | FRONTAL      | YES | GROSS TOTAL RESECTION (>90 |
| 780.00 | MILANO-BESTA | 60.00 | M | 70.00  | GBM                       | MULTILOBULAR | MULTICENTRIC | YES | GROSS TOTAL RESECTION (>90 |
| 781.00 | MILANO-BESTA | 73.00 | M | 60.00  | GBM                       | FRONTAL      | FRONTAL      | YES | GROSS TOTAL RESECTION (>90 |
| 782.00 | MILANO-BESTA | 31.00 | F | 100.00 | OLIGOASTROCITOMA III      | FRONTAL      | FRONTAL      | YES | GROSS TOTAL RESECTION (>90 |
| 783.00 | MILANO-BESTA | 34.00 | F | 70.00  | ASTROC III                | TEMPORAL     | TEMPORAL     | YES | GROSS TOTAL RESECTION (>90 |
| 784.00 | MILANO-BESTA | 37.00 | M | 100.00 | OLIGODENDROGLIOMA III     | FRONTAL      | FRONTAL      | YES | GROSS TOTAL RESECTION (>90 |
| 785.00 | MILANO-BESTA | 57.00 | F | 90.00  | ASTRO II                  | MULTICENTRIC | MULTICENTRIC | YES | BIOPSY                     |
| 786.00 | MILANO-BESTA | 64.00 | M | 90.00  | GBM                       | TEMPORAL     | TEMPORAL     | YES | GROSS TOTAL RESECTION (>90 |
| 787.00 | MILANO-BESTA | 53.00 | M | 70.00  | OLIGOASTROCITOMA III      | MULTILOBULAR | MULTICENTRIC | YES | GROSS TOTAL RESECTION (>90 |
| 788.00 | MILANO-BESTA | 65.00 | M | 80.00  | GBM                       | MULTICENTRIC | MULTICENTRIC | YES | PARTIAL RESECTION (<90%)   |
| 789.00 | MILANO-BESTA | 66.00 | M | 70.00  | OLIGOASTROCITOMA III      | MULTILOBULAR | MULTICENTRIC | YES | GROSS TOTAL RESECTION (>90 |
| 790.00 | MILANO-BESTA | 71.00 | M | 80.00  | GBM                       | FRONTAL      | FRONTAL      | YES | GROSS TOTAL RESECTION (>90 |
| 791.00 | MILANO-BESTA | 62.00 | M | 100.00 | GBM                       | TEMPORAL     | TEMPORAL     | YES | GROSS TOTAL RESECTION (>90 |
| 792.00 | TRIESTE      | 67.00 | F | 100.00 | GBM                       | MULTILOBULAR | MULTICENTRIC | YES | PARTIAL RESECTION (<90%)   |
| 793.00 | TRIESTE      | 71.00 | M | 90.00  | GBM                       | MULTILOBULAR | MULTICENTRIC | YES | PARTIAL RESECTION (<90%)   |
| 794.00 | TRIESTE      | 28.00 | M | 100.00 | ASTRO II                  | FRONTAL      | FRONTAL      | YES | GROSS TOTAL RESECTION (>90 |
| 795.00 | LECCO        | 39.00 | M | 80.00  | GBM                       | TEMPORAL     | TEMPORAL     | YES | GROSS TOTAL RESECTION (>90 |

|        |       |       |   |       |                           |          |          |     |                              |
|--------|-------|-------|---|-------|---------------------------|----------|----------|-----|------------------------------|
| 796.00 | LECCO | 52.00 | F | 70.00 | GBM                       | PARIETAL | PARIETAL | YES | PARTIAL RESECTION (<90%)     |
| 797.00 | LECCO | 69.00 | F | 60.00 | METASTASES                | FRONTAL  | FRONTAL  | YES | GROSS TOTAL RESECTION (>90%) |
| 798.00 | LECCO | 61.00 | F | 70.00 | GBM                       | FRONTAL  | FRONTAL  | YES | PARTIAL RESECTION (<90%)     |
| 799.00 | LECCO | 71.00 | M | 70.00 | GBM                       | PARIETAL | PARIETAL | YES | GROSS TOTAL RESECTION (>90%) |
| 800.00 | LECCO | 67.00 | M | 80.00 | OTHER (ATIPIC MENINGIOMI) | PARIETAL | PARIETAL | YES | GROSS TOTAL RESECTION (>90%) |
| 801.00 | LECCO | 61.00 | M | 70.00 | ASTRO II                  | TEMPORAL | TEMPORAL | YES | GROSS TOTAL RESECTION (>90%) |
| 802.00 | LECCO | 51.00 | F | 80.00 | ASTRO II                  | FRONTAL  | FRONTAL  | YES | GROSS TOTAL RESECTION (>90%) |
| 803.00 | LECCO | 58.00 | F | 90.00 | METASTASES                | FRONTAL  | FRONTAL  | YES | GROSS TOTAL RESECTION (>90%) |
| 804.00 | LECCO | 53.00 | M | 70.00 | GBM                       | PARIETAL | PARIETAL | YES | PARTIAL RESECTION (<90%)     |
| 805.00 | LECCO | 63.00 | F | 80.00 | GBM                       | FRONTAL  | FRONTAL  | YES | PARTIAL RESECTION (<90%)     |
| 806.00 | LECCO | 59.00 | M | 70.00 | GBM                       | TEMPORAL | TEMPORAL | YES | PARTIAL RESECTION (<90%)     |
| 807.00 | LECCO | 71.00 | M | 60.00 | GBM                       | TEMPORAL | TEMPORAL | YES | GROSS TOTAL RESECTION (>90%) |
| 808.00 | LECCO | 69.00 | M | 80.00 | GBM                       | TEMPORAL | TEMPORAL | YES | GROSS TOTAL RESECTION (>90%) |



|     |     |     |  |              |             |  |       |     |
|-----|-----|-----|--|--------------|-------------|--|-------|-----|
| YES |     |     |  | TEMOZOLOMIDE |             |  |       | YES |
| YES |     |     |  | TEMOZOLOMIDE |             |  |       | YES |
| NO  |     |     |  |              |             |  |       | NO  |
| YES |     |     |  | OTHER        |             |  |       | NO  |
| NO  |     |     |  |              |             |  |       | NO  |
| YES |     |     |  |              |             |  |       | YES |
| NO  |     |     |  |              |             |  |       | YES |
| NO  |     |     |  |              |             |  |       | NO  |
| NO  |     |     |  |              |             |  |       | NO  |
| YES |     |     |  | TEMOZOLOMIDE |             |  |       | YES |
| NO  |     |     |  |              |             |  |       | NO  |
| YES |     |     |  | OTHER        |             |  |       | YES |
| YES |     |     |  | OTHER        |             |  |       | NO  |
| YES |     |     |  | OTHER        |             |  |       | YES |
| NO  |     |     |  |              |             |  |       | NO  |
| NO  |     |     |  |              |             |  |       | NO  |
| NO  |     |     |  |              |             |  |       | NO  |
| YES |     |     |  | OTHER        |             |  |       | YES |
| YES |     |     |  | TEMOZOLOMIDE |             |  |       | NO  |
| YES |     |     |  | TEMOZOLOMIDE |             |  |       | YES |
| YES |     |     |  | TEMOZOLOMIDE |             |  |       | NO  |
| YES |     |     |  | TEMOZOLOMIDE |             |  |       | YES |
| YES |     |     |  | TEMOZOLOMIDE |             |  |       | YES |
| YES |     |     |  | OTHER        |             |  |       | YES |
| YES |     |     |  | TEMOZOLOMIDE |             |  |       | YES |
| NO  |     |     |  |              |             |  |       | YES |
| YES |     |     |  | OTHER        |             |  |       | YES |
| YES | YES |     |  | TEMOZOLOMIDE | OTHER       |  |       | YES |
| YES |     |     |  | OTHER        |             |  |       | YES |
| NO  |     |     |  |              |             |  |       | NO  |
| YES |     |     |  | TEMOZOLOMIDE |             |  |       | YES |
| YES |     |     |  | TEMOZOLOMIDE |             |  |       | YES |
| NO  |     |     |  |              |             |  |       | NO  |
| NO  |     |     |  |              |             |  |       | NO  |
| NO  |     |     |  |              |             |  |       | NO  |
| YES | YES | YES |  | TEMOZOLOMIDE | OTHER       |  | PVC   | YES |
| YES |     |     |  | OTHER        |             |  |       | YES |
| YES | YES | YES |  | TEMOZOLOMIDE | FOTEMUSTINE |  | OTHER | YES |
| YES |     |     |  | OTHER        |             |  |       | NO  |
| NO  |     |     |  |              |             |  |       | NO  |
| YES |     |     |  | OTHER        |             |  |       | YES |



|     |     |              |             |     |
|-----|-----|--------------|-------------|-----|
| YES |     | OTHER        |             | YES |
| YES |     | TEMOZOLOMIDE |             | YES |
| NO  |     |              |             | YES |
| NO  |     |              |             | NO  |
| YES |     | TEMOZOLOMIDE |             | YES |
| NO  |     |              |             | NO  |
| YES |     | TEMOZOLOMIDE |             | YES |
| NO  |     |              |             | NO  |
| YES |     | TEMOZOLOMIDE |             | YES |
| YES |     | OTHER        |             | YES |
| NO  |     |              |             | YES |
| NO  |     |              |             | YES |
| YES |     | TEMOZOLOMIDE |             | YES |
| NO  |     |              |             | NO  |
| YES |     | TEMOZOLOMIDE |             | YES |
| YES |     | TEMOZOLOMIDE |             | YES |
| NO  |     |              |             | NO  |
| NO  |     |              |             | NO  |
| YES |     | TEMOZOLOMIDE |             | YES |
| YES |     | TEMOZOLOMIDE |             | YES |
| YES |     | TEMOZOLOMIDE |             | NO  |
| YES | YES | TEMOZOLOMIDE | FOTEMUSTINE | YES |
| NO  |     |              |             | NO  |
| YES |     | TEMOZOLOMIDE |             | YES |
| NO  |     |              |             | NO  |
| NO  |     |              |             | YES |
| YES | YES | TEMOZOLOMIDE | BEVACIZUMAB | YES |
| YES |     | TEMOZOLOMIDE |             | YES |
| YES |     | TEMOZOLOMIDE |             | YES |
| YES |     | TEMOZOLOMIDE |             | YES |
| YES |     | TEMOZOLOMIDE |             | YES |
| YES |     | TEMOZOLOMIDE |             | YES |
| YES |     | TEMOZOLOMIDE |             | YES |
| YES |     | TEMOZOLOMIDE |             | YES |
| YES |     | TEMOZOLOMIDE |             | YES |
| YES |     | OTHER        |             | YES |
| YES |     | TEMOZOLOMIDE |             | YES |
| YES |     | TEMOZOLOMIDE |             | YES |
| YES |     | TEMOZOLOMIDE |             | YES |
| YES |     | TEMOZOLOMIDE |             | YES |
| YES |     | TEMOZOLOMIDE |             | YES |
| NO  |     |              |             | NO  |
| NO  |     |              |             | YES |



|     |     |              |              |     |
|-----|-----|--------------|--------------|-----|
| YES |     | TEMOZOLOMIDE |              | YES |
| YES |     | TEMOZOLOMIDE |              | YES |
| NO  |     |              |              | YES |
| YES |     | OTHER        |              | YES |
| YES |     | TEMOZOLOMIDE |              | YES |
| NO  |     |              |              | NO  |
| NO  |     |              |              | YES |
| YES |     | TEMOZOLOMIDE |              | YES |
| NO  |     |              |              | NO  |
| YES |     | TEMOZOLOMIDE |              | YES |
| YES |     | TEMOZOLOMIDE |              | YES |
| YES |     | OTHER        |              | NO  |
| NO  |     |              |              | NO  |
| NO  |     |              |              | YES |
| YES |     |              |              | YES |
| YES |     |              |              | YES |
| YES |     | TEMOZOLOMIDE |              | YES |
| NO  |     |              |              | YES |
| YES |     |              |              | YES |
| NO  |     |              |              | NO  |
| NO  |     |              |              | NO  |
| YES |     |              |              | YES |
| YES |     |              |              | YES |
| NO  |     |              |              | NO  |
| NO  |     |              |              | NO  |
| NO  |     |              |              | NO  |
| NO  |     |              |              | NO  |
| NO  |     |              |              | NO  |
| YES |     |              |              | NO  |
| YES |     |              |              | YES |
| YES |     | TEMOZOLOMIDE | TEMOZOLOMIDE | YES |
| YES | YES | TEMOZOLOMIDE |              | NO  |
| NO  |     |              |              | NO  |
| NO  |     |              |              | NO  |
| NO  |     |              |              | NO  |
| NO  |     |              |              | NO  |
| YES |     | TEMOZOLOMIDE |              | NO  |
| YES |     | TEMOZOLOMIDE |              | YES |

|     |  |  |     |
|-----|--|--|-----|
| NO  |  |  | NO  |
| YES |  |  | YES |
| YES |  |  | YES |
| YES |  |  | YES |
| YES |  |  | NO  |
| NO  |  |  | NO  |
| NO  |  |  | NO  |
| NO  |  |  | NO  |
| YES |  |  | YES |
| NO  |  |  | NO  |
| YES |  |  | YES |
| NO  |  |  | NO  |
| YES |  |  | YES |
| YES |  |  | YES |
| NO  |  |  | NO  |
| YES |  |  | YES |
| NO  |  |  | YES |
| NO  |  |  | YES |
| NO  |  |  | NO  |
| NO  |  |  | NO  |
| NO  |  |  | NO  |
| NO  |  |  | NO  |
| YES |  |  | NO  |
| YES |  |  | YES |
| YES |  |  | YES |
| YES |  |  | YES |
| NO  |  |  | YES |
| NO  |  |  | NO  |
| NO  |  |  | NO  |
| NO  |  |  | NO  |
| NO  |  |  | NO  |
| NO  |  |  | NO  |
| YES |  |  | YES |
| NO  |  |  | NO  |
| YES |  |  | YES |
| NO  |  |  | NO  |
| YES |  |  | NO  |
| NO  |  |  | NO  |
| NO  |  |  | NO  |
| NO  |  |  | NO  |
| NO  |  |  | YES |
| NO  |  |  | NO  |

TEMOZOLOMIDE  
TEMOZOLOMIDE  
TEMOZOLOMIDE  
TEMOZOLOMIDE

TEMOZOLOMIDE

TEMOZOLOMIDE

TEMOZOLOMIDE  
TEMOZOLOMIDE

TEMOZOLOMIDE

TEMOZOLOMIDE

TEMOZOLOMIDE  
TEMOZOLOMIDE  
PVC  
TEMOZOLOMIDE

TEMOZOLOMIDE

TEMOZOLOMIDE

TEMOZOLOMIDE

|     |     |  |              |     |
|-----|-----|--|--------------|-----|
| NO  |     |  |              | NO  |
| YES |     |  | TEMOZOLOMIDE | YES |
| YES | YES |  | TEMOZOLOMIDE | YES |
| YES | YES |  | FOTEMUSTINE  | YES |
| YES |     |  | TEMOZOLOMIDE | YES |
| YES | YES |  | TEMOZOLOMIDE | YES |
| YES |     |  | TEMOZOLOMIDE | NO  |
| YES | YES |  | TEMOZOLOMIDE | NO  |
| YES |     |  | TEMOZOLOMIDE | YES |
| YES | YES |  | TEMOZOLOMIDE | YES |
| YES | YES |  | TEMOZOLOMIDE | YES |
| NO  |     |  |              | NO  |
| NO  |     |  |              | NO  |
| NO  |     |  |              | NO  |
| NO  |     |  |              | NO  |
| YES | YES |  | TEMOZOLOMIDE | YES |
| NO  |     |  |              | NO  |
| YES |     |  | TEMOZOLOMIDE | YES |
| NO  |     |  |              | YES |
| YES |     |  | TEMOZOLOMIDE | NO  |
| YES |     |  | TEMOZOLOMIDE | YES |
| NO  |     |  |              | YES |
| YES |     |  | OTHER        | YES |
| YES |     |  | TEMOZOLOMIDE | YES |
| NO  |     |  |              | YES |
| YES |     |  | TEMOZOLOMIDE | YES |
| NO  |     |  |              | YES |
| NO  |     |  |              | YES |
| YES |     |  | TEMOZOLOMIDE | NO  |
| NO  |     |  |              | YES |
| NO  |     |  |              | NO  |
| YES |     |  | TEMOZOLOMIDE | YES |
| YES |     |  | OTHER        | NO  |
| YES |     |  | OTHER        | YES |
| YES |     |  | OTHER        | YES |
| YES |     |  | TEMOZOLOMIDE | YES |
| YES |     |  | TEMOZOLOMIDE | YES |
| YES |     |  | OTHER        | YES |
| NO  |     |  |              | YES |
| NO  |     |  |              | NO  |
| YES |     |  | OTHER        | YES |
| YES |     |  | OTHER        | YES |

|     |              |     |
|-----|--------------|-----|
| YES | OTHER        | NO  |
| YES | OTHER        | YES |
| NO  |              | NO  |
| NO  |              | NO  |
| NO  |              | YES |
| YES | OTHER        | NO  |
| YES | OTHER        | NO  |
| YES | TEMOZOLOMIDE | YES |
| NO  |              | YES |
| YES | TEMOZOLOMIDE | NO  |
| NO  |              | NO  |
| NO  |              | YES |
| NO  |              | NO  |
| NO  |              | YES |
| NO  |              | NO  |
| YES | TEMOZOLOMIDE | YES |
| YES | TEMOZOLOMIDE | YES |
| YES | TEMOZOLOMIDE | NO  |
| NO  |              | NO  |
| NO  |              | NO  |
| NO  |              | NO  |
| YES | TEMOZOLOMIDE | YES |
| YES | TEMOZOLOMIDE | YES |
| YES | TEMOZOLOMIDE | YES |
| YES | TEMOZOLOMIDE | YES |
| NO  |              | NO  |
| NO  | TEMOZOLOMIDE | NO  |
| YES | TEMOZOLOMIDE | YES |
| YES | TEMOZOLOMIDE | NO  |
| YES | TEMOZOLOMIDE | YES |
| NO  |              | NO  |
| NO  |              | NO  |
| NO  |              | YES |
| YES | TEMOZOLOMIDE | NO  |
| YES | TEMOZOLOMIDE | YES |
| YES | TEMOZOLOMIDE | YES |
| YES | TEMOZOLOMIDE | YES |
| YES | TEMOZOLOMIDE | YES |
| YES | TEMOZOLOMIDE | YES |
| YES | OTHER        | NO  |
| YES | OTHER        | NO  |

|     |     |              |              |     |
|-----|-----|--------------|--------------|-----|
| YES |     | OTHER        |              | NO  |
| YES | YES | OTHER        | TEMOZOLOMIDE | YES |
| YES |     |              |              | YES |
| NO  |     |              |              | NO  |
| NO  |     |              |              | NO  |
| NO  |     |              |              | YES |
| NO  |     |              |              | YES |
| NO  |     |              |              | NO  |
| NO  |     |              |              | NO  |
| NO  |     |              |              | YES |
| YES |     |              |              | NO  |
| NO  |     |              |              | YES |
| NO  |     |              |              | YES |
| YES |     | OTHER        |              | NO  |
| NO  |     |              |              | YES |
| NO  |     |              |              | YES |
| NO  |     |              |              | NO  |
| NO  |     |              |              | NO  |
| YES |     | TEMOZOLOMIDE |              | YES |
| YES |     | TEMOZOLOMIDE |              | YES |
| NO  |     |              |              | YES |
| YES |     | TEMOZOLOMIDE |              | NO  |
| NO  |     |              |              | NO  |
| NO  |     |              |              | NO  |
| NO  |     |              |              | NO  |
| NO  |     |              |              | NO  |
| YES |     | TEMOZOLOMIDE |              | YES |
| YES |     | TEMOZOLOMIDE |              | YES |
| YES |     | TEMOZOLOMIDE |              | YES |
| YES |     | TEMOZOLOMIDE |              | YES |
| NO  |     |              |              | NO  |
| YES |     | TEMOZOLOMIDE |              | YES |
| YES |     | TEMOZOLOMIDE |              | YES |
| YES |     | TEMOZOLOMIDE |              | YES |
| YES |     | TEMOZOLOMIDE |              | YES |
| YES |     | TEMOZOLOMIDE |              | YES |
| YES |     | TEMOZOLOMIDE |              | YES |
| YES |     | TEMOZOLOMIDE |              | YES |
| YES |     | TEMOZOLOMIDE |              | YES |
| YES |     | TEMOZOLOMIDE |              | NO  |
| YES |     | TEMOZOLOMIDE |              | YES |
| YES |     | TEMOZOLOMIDE |              | YES |
| YES |     | TEMOZOLOMIDE |              | NO  |
| YES |     | TEMOZOLOMIDE |              | YES |
| YES |     | TEMOZOLOMIDE |              | YES |

|     |     |  |              |             |     |
|-----|-----|--|--------------|-------------|-----|
| NO  |     |  |              |             | NO  |
| NO  |     |  |              |             | NO  |
| YES |     |  | TEMOZOLOMIDE |             | YES |
| YES |     |  | TEMOZOLOMIDE |             | YES |
| YES | YES |  | TEMOZOLOMIDE | GLIADEL     | YES |
| YES |     |  | TEMOZOLOMIDE |             | YES |
| YES |     |  | TEMOZOLOMIDE |             | YES |
| YES | YES |  | TEMOZOLOMIDE | GLIADEL     | YES |
| YES |     |  | TEMOZOLOMIDE |             | YES |
| YES |     |  | TEMOZOLOMIDE |             | YES |
| YES |     |  | TEMOZOLOMIDE |             | YES |
| YES |     |  | TEMOZOLOMIDE |             | YES |
| YES |     |  | TEMOZOLOMIDE |             | YES |
| YES | YES |  | TEMOZOLOMIDE | GLIADEL     | YES |
| YES |     |  | TEMOZOLOMIDE |             | YES |
| YES | YES |  | TEMOZOLOMIDE | GLIADEL     | YES |
| YES |     |  | TEMOZOLOMIDE |             | YES |
| YES |     |  | TEMOZOLOMIDE |             | YES |
| YES |     |  | TEMOZOLOMIDE |             | YES |
| YES |     |  | TEMOZOLOMIDE |             | YES |
| YES |     |  | TEMOZOLOMIDE |             | YES |
| YES |     |  | TEMOZOLOMIDE |             | YES |
| YES |     |  | TEMOZOLOMIDE |             | YES |
| YES |     |  | TEMOZOLOMIDE |             | YES |
| YES |     |  | TEMOZOLOMIDE |             | YES |
| YES | YES |  | TEMOZOLOMIDE | PVC         | YES |
| YES |     |  | TEMOZOLOMIDE |             | YES |
| YES | YES |  | TEMOZOLOMIDE | FOTEMUSTINE | YES |
| YES | YES |  | TEMOZOLOMIDE | GLIADEL     | YES |
| YES | YES |  | TEMOZOLOMIDE | GLIADEL     | YES |
| YES | YES |  | TEMOZOLOMIDE | GLIADEL     | YES |
| YES | YES |  | TEMOZOLOMIDE | GLIADEL     | YES |
| YES |     |  | TEMOZOLOMIDE |             | YES |
| NO  |     |  |              |             | NO  |
| NO  |     |  |              |             | NO  |
| NO  |     |  |              |             | NO  |
| NO  |     |  |              |             | NO  |
| NO  |     |  |              |             | NO  |



|     |     |     |  |              |              |             |     |
|-----|-----|-----|--|--------------|--------------|-------------|-----|
| YES |     |     |  |              |              |             | YES |
| NO  |     |     |  |              |              |             | NO  |
| NO  |     |     |  |              |              |             | NO  |
| YES |     |     |  | FOTEMUSTINE  |              |             | YES |
| YES |     |     |  | TEMOZOLOMIDE |              |             | YES |
| YES |     |     |  | TEMOZOLOMIDE |              |             | YES |
| YES |     |     |  | TEMOZOLOMIDE |              |             | YES |
| YES |     |     |  | TEMOZOLOMIDE |              |             | YES |
| YES |     |     |  | FOTEMUSTINE  |              |             | YES |
| YES |     |     |  | FOTEMUSTINE  |              |             | YES |
| YES |     |     |  | OTHER        |              |             | YES |
| NO  |     |     |  |              |              |             | NO  |
| YES |     |     |  |              |              |             | YES |
| YES |     |     |  | TEMOZOLOMIDE |              |             | YES |
| YES |     |     |  | TEMOZOLOMIDE |              |             | YES |
| YES | YES |     |  | TEMOZOLOMIDE | FOTEMUSTINE  |             | YES |
| YES |     |     |  | TEMOZOLOMIDE |              |             | YES |
| NO  |     |     |  |              |              |             | YES |
| YES |     |     |  | TEMOZOLOMIDE |              |             | YES |
| YES |     |     |  | TEMOZOLOMIDE |              |             | YES |
| YES |     |     |  | TEMOZOLOMIDE |              |             | YES |
| YES |     |     |  | TEMOZOLOMIDE |              |             | YES |
| YES |     |     |  | TEMOZOLOMIDE |              |             | YES |
| YES |     |     |  | TEMOZOLOMIDE |              |             | YES |
| YES |     |     |  | TEMOZOLOMIDE |              |             | YES |
| YES |     |     |  | TEMOZOLOMIDE |              |             | YES |
| YES |     |     |  | TEMOZOLOMIDE |              |             | YES |
| YES |     |     |  | TEMOZOLOMIDE |              |             | YES |
| YES |     |     |  | TEMOZOLOMIDE |              |             | YES |
| YES | YES | YES |  | GLIADEL      | TEMOZOLOMIDE | GLIADEL     | YES |
| YES | YES | YES |  | TEMOZOLOMIDE | GLIADEL      | FOTEMUSTINE | YES |
| YES |     |     |  | TEMOZOLOMIDE |              |             | YES |
| YES | YES |     |  | TEMOZOLOMIDE | PVC          |             | YES |
| YES |     |     |  | TEMOZOLOMIDE |              |             | YES |
| YES |     |     |  | TEMOZOLOMIDE |              |             | YES |
| YES |     |     |  | TEMOZOLOMIDE |              |             | YES |
| YES |     |     |  | TEMOZOLOMIDE |              |             | YES |
| YES |     |     |  | TEMOZOLOMIDE |              |             | YES |
| 9%) |     |     |  |              |              |             | NO  |
| YES |     |     |  | TEMOZOLOMIDE |              |             | YES |
| YES |     |     |  | TEMOZOLOMIDE |              |             | YES |
| YES |     |     |  | TEMOZOLOMIDE |              |             | YES |
| YES |     |     |  | TEMOZOLOMIDE |              |             | YES |



|     |     |              |         |     |
|-----|-----|--------------|---------|-----|
| YES |     | TEMOZOLOMIDE |         | YES |
| YES |     | TEMOZOLOMIDE |         | YES |
| YES |     | TEMOZOLOMIDE |         | YES |
| YES |     | TEMOZOLOMIDE |         | YES |
| YES |     | TEMOZOLOMIDE |         | YES |
| NO  |     |              |         | NO  |
| YES |     | TEMOZOLOMIDE |         | YES |
| YES |     | TEMOZOLOMIDE |         | YES |
| YES |     | TEMOZOLOMIDE |         | YES |
| NO  |     |              |         | YES |
| YES |     | TEMOZOLOMIDE |         | YES |
| NO  |     |              |         | YES |
| YES |     | TEMOZOLOMIDE |         | YES |
| YES |     | TEMOZOLOMIDE |         | YES |
| YES | YES | TEMOZOLOMIDE | PVC     | YES |
| YES |     | TEMOZOLOMIDE |         | YES |
| NO  |     |              |         | NO  |
| YES |     | TEMOZOLOMIDE |         | YES |
| NO  |     |              |         | YES |
| NO  |     |              |         | YES |
| YES | YES | TEMOZOLOMIDE | OTHER   | YES |
| YES | YES | TEMOZOLOMIDE |         | YES |
| YES |     | TEMOZOLOMIDE |         | YES |
| YES | YES | TEMOZOLOMIDE | GLIADEL | YES |
| YES |     | TEMOZOLOMIDE |         | YES |
| YES | YES | TEMOZOLOMIDE | PVC     | YES |
| NO  |     |              |         | YES |
| YES |     | TEMOZOLOMIDE |         | YES |
| NO  |     |              |         | YES |
| YES |     | TEMOZOLOMIDE |         | YES |
| YES |     | TEMOZOLOMIDE |         | YES |
| YES |     | TEMOZOLOMIDE |         | YES |
| YES |     | TEMOZOLOMIDE |         | YES |
| YES |     | TEMOZOLOMIDE |         | YES |
| NO  |     |              |         | YES |
| YES |     | TEMOZOLOMIDE |         | YES |
| YES |     | TEMOZOLOMIDE |         | YES |
| NO  |     |              |         | NO  |
| YES |     | TEMOZOLOMIDE |         | YES |
| YES |     | TEMOZOLOMIDE |         | YES |
| YES |     | TEMOZOLOMIDE |         | YES |
| YES |     | TEMOZOLOMIDE |         | YES |

|     |     |     |  |              |              |             |     |
|-----|-----|-----|--|--------------|--------------|-------------|-----|
| YES |     |     |  | TEMOZOLOMIDE |              |             | YES |
| YES |     |     |  | TEMOZOLOMIDE |              |             | YES |
| YES |     |     |  | TEMOZOLOMIDE |              |             | YES |
| NO  |     |     |  |              |              |             | YES |
| NO  |     |     |  |              |              |             | NO  |
| YES |     |     |  | TEMOZOLOMIDE |              |             | YES |
| NO  |     |     |  |              |              |             | YES |
| YES |     |     |  | TEMOZOLOMIDE |              |             | YES |
| YES |     |     |  | TEMOZOLOMIDE |              |             | YES |
| YES |     |     |  | TEMOZOLOMIDE |              |             | YES |
| YES |     |     |  | TEMOZOLOMIDE |              |             | YES |
| YES |     |     |  | TEMOZOLOMIDE |              |             | YES |
| YES |     |     |  | TEMOZOLOMIDE |              |             | YES |
| YES |     |     |  | TEMOZOLOMIDE |              |             | YES |
| YES |     |     |  | TEMOZOLOMIDE |              |             | YES |
| YES |     |     |  | TEMOZOLOMIDE |              |             | YES |
| YES |     |     |  | TEMOZOLOMIDE |              |             | YES |
| YES | YES |     |  | TEMOZOLOMIDE | FOTEMUSTINE  |             | YES |
| YES |     |     |  | TEMOZOLOMIDE |              |             | YES |
| NO  |     |     |  |              |              |             | NO  |
| YES |     |     |  | TEMOZOLOMIDE |              |             | YES |
| YES |     |     |  | TEMOZOLOMIDE |              |             | YES |
| YES |     |     |  | TEMOZOLOMIDE |              |             | YES |
| YES |     |     |  | TEMOZOLOMIDE |              |             | YES |
| YES | YES | YES |  | PVC          | TEMOZOLOMIDE | GLIADEL     | YES |
| NO  |     |     |  |              |              |             | NO  |
| YES | YES |     |  | PVC          | TEMOZOLOMIDE |             | YES |
| YES |     |     |  | TEMOZOLOMIDE |              |             | YES |
| YES |     |     |  | TEMOZOLOMIDE |              |             | YES |
| YES | YES |     |  | PVC          | TEMOZOLOMIDE |             | YES |
| YES | YES |     |  | PVC          | TEMOZOLOMIDE |             | YES |
| NO  |     |     |  |              |              |             | NO  |
| YES | YES |     |  | TEMOZOLOMIDE | PVC          |             | YES |
| YES | YES |     |  | TEMOZOLOMIDE | BEVACIZUMAB  |             | YES |
| NO  |     |     |  |              |              |             | NO  |
| YES | YES | YES |  | TEMOZOLOMIDE | FOTEMUSTINE  | BEVACIZUMAB | YES |
| YES | YES | YES |  | TEMOZOLOMIDE | FOTEMUSTINE  | BEVACIZUMAB | YES |
| YES |     |     |  | TEMOZOLOMIDE |              |             | YES |
| YES |     |     |  | TEMOZOLOMIDE |              |             | YES |
| YES | YES | YES |  | TEMOZOLOMIDE | GLIADEL      | FOTEMUSTINE | YES |
| YES |     |     |  | OTHER        |              |             | YES |

|     |     |     |              |              |             |     |
|-----|-----|-----|--------------|--------------|-------------|-----|
| YES | YES |     | GLIADEL      | TEMOZOLOMIDE |             | YES |
| YES |     |     | TEMOZOLOMIDE |              |             | YES |
| YES | YES | YES | FOTEMUSTINE  | BEVACIZUMAB  | OTHER       | YES |
| YES | YES | YES | TEMOZOLOMIDE | GLIADEL      | FOTEMUSTINE | YES |
| YES |     |     | TEMOZOLOMIDE | GLIADEL      |             | YES |
| YES | YES |     | TEMOZOLOMIDE | OTHER        |             | YES |
| YES |     |     | TEMOZOLOMIDE |              |             | YES |
| YES | YES | YES | GLIADEL      | TEMOZOLOMIDE | FOTEMUSTINE | YES |
| YES | YES | YES | TEMOZOLOMIDE | GLIADEL      | FOTEMUSTINE | YES |
| NO  |     |     |              |              |             | NO  |
| YES | YES | YES | GLIADEL      | TEMOZOLOMIDE | FOTEMUSTINE | YES |
| YES | YES | YES | TEMOZOLOMIDE | OTHER        | BEVACIZUMAB | YES |
| YES |     |     | TEMOZOLOMIDE |              |             | YES |
| YES |     |     | OTHER        |              |             | YES |
| YES | YES | YES | GLIADEL      | TEMOZOLOMIDE | FOTEMUSTINE | YES |
| YES | YES |     | TEMOZOLOMIDE | FOTEMUSTINE  |             | YES |
| YES | YES | YES | TEMOZOLOMIDE | BEVACIZUMAB  | OTHER       | YES |
| YES | YES |     | FOTEMUSTINE  | TEMOZOLOMIDE |             | YES |
| NO  |     |     |              |              |             | NO  |
| YES | YES |     | TEMOZOLOMIDE | OTHER        |             | YES |
| NO  |     |     |              |              |             | NO  |
| YES |     |     | TEMOZOLOMIDE |              |             | YES |
| YES |     |     | TEMOZOLOMIDE |              |             | YES |
| YES | YES |     | TEMOZOLOMIDE | FOTEMUSTINE  |             | YES |
| YES | YES | YES | TEMOZOLOMIDE | FOTEMUSTINE  | BEVACIZUMAB | YES |
| YES | YES | YES | TEMOZOLOMIDE | BEVACIZUMAB  | FOTEMUSTINE | YES |
| YES |     |     | TEMOZOLOMIDE |              |             | YES |
| YES | YES |     | TEMOZOLOMIDE | BEVACIZUMAB  |             | YES |
| NO  |     |     |              |              |             | NO  |
| YES |     |     | TEMOZOLOMIDE |              |             | YES |
| YES |     |     | OTHER        |              |             | YES |
| NO  |     |     |              |              |             | NO  |
| NO  |     |     |              |              |             | YES |
| NO  |     |     |              |              |             | NO  |
| YES |     |     | TEMOZOLOMIDE |              |             | YES |
| NO  |     |     |              |              |             | NO  |
| %)  |     |     |              |              |             |     |
| NO  |     |     |              |              |             | NO  |
| YES |     |     | TEMOZOLOMIDE |              |             | YES |
| NO  |     |     |              |              |             | NO  |

|     |     |  |     |              |             |              |     |
|-----|-----|--|-----|--------------|-------------|--------------|-----|
| YES |     |  |     | PVC          |             |              |     |
| YES |     |  |     | PVC          |             |              |     |
| NO  |     |  |     |              |             |              | NO  |
| YES |     |  |     | OTHER        |             |              | YES |
| NO  |     |  |     |              |             |              | YES |
| YES |     |  |     | TEMOZOLOMIDE |             |              | YES |
| YES |     |  |     | PVC          |             |              | YES |
| YES |     |  |     | OTHER        |             |              | YES |
| YES |     |  |     | OTHER        |             |              | YES |
| YES | YES |  | YES | FOTEMUSTINE  | PVC         | TEMOZOLOMIDE | NO  |
| YES |     |  |     |              |             |              | YES |
| YES |     |  |     | PVC          |             |              | YES |
| YES |     |  |     | TEMOZOLOMIDE |             |              | NO  |
| YES |     |  |     | TEMOZOLOMIDE |             |              | YES |
| NO  |     |  |     |              |             |              | YES |
| YES | YES |  |     | TEMOZOLOMIDE | PVC         |              | YES |
| YES |     |  |     | TEMOZOLOMIDE |             |              |     |
| YES | YES |  |     | TEMOZOLOMIDE | FOTEMUSTINE |              | YES |
| YES |     |  |     | TEMOZOLOMIDE |             |              | YES |
| NO  |     |  |     |              |             |              | NO  |
| NO  |     |  |     |              |             |              | NO  |
| NO  |     |  |     |              |             |              | NO  |
| NO  |     |  |     |              |             |              | NO  |
| NO  |     |  |     |              |             |              | NO  |
| NO  |     |  |     |              |             |              | NO  |
| NO  |     |  |     |              |             |              | NO  |
| YES | YES |  |     | TEMOZOLOMIDE | PVC         |              | YES |
| NO  |     |  |     |              |             |              | YES |
| %)  |     |  |     |              |             |              | YES |
| NO  |     |  |     |              |             |              | NO  |
| %)  |     |  |     |              |             |              |     |
| NO  |     |  |     |              |             |              | NO  |
| NO  |     |  |     |              |             |              | NO  |
| NO  |     |  |     |              |             |              | NO  |
| NO  |     |  |     |              |             |              | NO  |
| YES |     |  |     | TEMOZOLOMIDE |             |              | YES |
| YES |     |  |     | TEMOZOLOMIDE |             |              | YES |
| YES |     |  |     | TEMOZOLOMIDE |             |              | NO  |
| NO  |     |  |     |              |             |              | NO  |
| YES |     |  |     | OTHER        |             |              | YES |

|     |     |              |             |     |
|-----|-----|--------------|-------------|-----|
| YES | YES | TEMOZOLOMIDE | FOTEMUSTINE | NO  |
| YES | YES | TEMOZOLOMIDE | FOTEMUSTINE | YES |
| YES |     | TEMOZOLOMIDE |             | YES |
| YES |     | TEMOZOLOMIDE |             | YES |
| YES |     | OTHER        |             | YES |
| NO  |     |              |             | NO  |
| YES | YES | TEMOZOLOMIDE | BEVACIZUMAB | YES |
| NO  |     |              |             | NO  |
| YES |     | TEMOZOLOMIDE |             | YES |
| %)  |     |              |             |     |
| YES |     | TEMOZOLOMIDE |             | YES |
| NO  |     |              |             | YES |
| YES |     | TEMOZOLOMIDE |             | NO  |
| YES |     | TEMOZOLOMIDE |             | YES |
| YES | YES | TEMOZOLOMIDE | FOTEMUSTINE | YES |
| YES |     | TEMOZOLOMIDE |             | YES |
| YES |     | TEMOZOLOMIDE |             | YES |
| NO  |     |              |             | YES |
| NO  |     |              |             | YES |
| YES |     | TEMOZOLOMIDE |             | YES |
| NO  |     |              |             | NO  |
| NO  |     |              |             | NO  |
| YES | YES | TEMOZOLOMIDE | OTHER       | YES |
| YES |     | TEMOZOLOMIDE |             | YES |
| YES |     | TEMOZOLOMIDE |             | NO  |
| %)  |     |              |             |     |
| %)  |     |              |             |     |
| YES |     | FOTEMUSTINE  |             | YES |
| YES |     | TEMOZOLOMIDE |             | NO  |
| YES |     | TEMOZOLOMIDE |             | YES |
| YES |     | TEMOZOLOMIDE |             | YES |
| NO  |     |              |             | NO  |
| YES | YES | TEMOZOLOMIDE | BEVACIZUMAB | YES |
| YES |     | TEMOZOLOMIDE |             | YES |
| YES |     | TEMOZOLOMIDE |             | YES |
| NO  |     |              |             | NO  |
| YES | YES | TEMOZOLOMIDE | FOTEMUSTINE | YES |
| YES | YES | TEMOZOLOMIDE | OTHER       | YES |
| YES |     | TEMOZOLOMIDE |             | YES |
| YES |     | TEMOZOLOMIDE |             | YES |

|     |     |  |              |             |     |
|-----|-----|--|--------------|-------------|-----|
| NO  |     |  |              |             | NO  |
| YES | YES |  | TEMOZOLOMIDE | FOTEMUSTINE | YES |
| NO  |     |  |              |             | NO  |
| NO  |     |  |              |             | NO  |
| NO  |     |  |              |             | NO  |
| YES |     |  | FOTEMUSTINE  |             | YES |
| YES |     |  | TEMOZOLOMIDE |             | YES |
| NO  |     |  |              |             | NO  |
| %)  |     |  |              |             |     |
| NO  |     |  |              |             | NO  |
| YES |     |  | TEMOZOLOMIDE |             | NO  |
|     |     |  |              |             |     |
| YES | YES |  | TEMOZOLOMIDE | GLIADEL     | YES |
| %)  |     |  |              |             |     |
| YES |     |  | TEMOZOLOMIDE |             | YES |
| YES |     |  | TEMOZOLOMIDE |             | NO  |
| NO  |     |  |              |             | NO  |
| YES |     |  | TEMOZOLOMIDE |             | YES |
| %)  |     |  |              |             |     |
| YES |     |  | TEMOZOLOMIDE |             | YES |
| YES |     |  | TEMOZOLOMIDE |             | YES |
| YES |     |  | TEMOZOLOMIDE |             | YES |
| YES |     |  | TEMOZOLOMIDE |             | YES |
| YES |     |  | TEMOZOLOMIDE |             | YES |
| YES |     |  | TEMOZOLOMIDE |             | YES |
|     |     |  |              |             |     |
| %)  |     |  |              |             |     |
| YES |     |  | TEMOZOLOMIDE |             | YES |
| YES |     |  | TEMOZOLOMIDE |             | YES |
| %)  |     |  |              |             |     |
| YES |     |  | OTHER        |             | YES |
| YES |     |  | TEMOZOLOMIDE |             | YES |
| YES |     |  | TEMOZOLOMIDE |             | YES |
| YES |     |  | TEMOZOLOMIDE |             | YES |
| YES |     |  | TEMOZOLOMIDE |             | YES |
| YES | YES |  | TEMOZOLOMIDE | GLIADEL     | YES |
| YES |     |  | GLIADEL      |             |     |
| YES |     |  | TEMOZOLOMIDE |             | YES |
| YES |     |  | TEMOZOLOMIDE |             | YES |
| YES |     |  | TEMOZOLOMIDE |             | YES |
| %)  |     |  |              |             |     |
| YES |     |  | TEMOZOLOMIDE |             | YES |

|     |     |     |  |              |              |             |     |
|-----|-----|-----|--|--------------|--------------|-------------|-----|
| %)  |     |     |  |              |              |             | YES |
| YES |     |     |  | TEMOZOLOMIDE |              |             | YES |
| YES | YES |     |  | TEMOZOLOMIDE | FOTEMUSTINE  |             | YES |
| NO  |     |     |  |              |              |             | YES |
| %)  |     |     |  |              |              |             |     |
| YES | YES | YES |  | TEMOZOLOMIDE | FOTEMUSTINE  | BEVACIZUMAB | YES |
| %)  |     |     |  |              |              |             |     |
| YES | YES |     |  | GLIADEL      | TEMOZOLOMIDE |             | YES |
| YES |     |     |  | TEMOZOLOMIDE |              |             | YES |
| NO  |     |     |  |              |              |             | NO  |
| YES |     |     |  | TEMOZOLOMIDE |              |             | YES |
| YES |     |     |  | TEMOZOLOMIDE |              |             | YES |
| %)  |     |     |  |              |              |             |     |
| YES |     |     |  | TEMOZOLOMIDE |              |             | YES |
| YES | YES |     |  | TEMOZOLOMIDE | BEVACIZUMAB  |             | YES |
| NO  |     |     |  |              |              |             | YES |
| NO  |     |     |  |              |              |             | YES |
| YES | YES |     |  | TEMOZOLOMIDE | GLIADEL      |             | YES |
| YES |     |     |  | TEMOZOLOMIDE |              |             | YES |
| NO  |     |     |  |              |              |             | YES |
| YES |     |     |  | OTHER        |              |             | YES |
| YES | YES |     |  | TEMOZOLOMIDE | BEVACIZUMAB  |             | YES |
| YES |     |     |  | TEMOZOLOMIDE |              |             | YES |
| YES |     |     |  | TEMOZOLOMIDE |              |             | YES |
| %)  |     |     |  |              |              |             |     |
| YES | YES | YES |  | TEMOZOLOMIDE | OTHER        | BEVACIZUMAB | YES |
| YES | YES | YES |  | TEMOZOLOMIDE | FOTEMUSTINE  | BEVACIZUMAB | YES |
| YES |     |     |  | TEMOZOLOMIDE |              |             | YES |
| NO  |     |     |  |              |              |             | YES |
| YES | YES |     |  | TEMOZOLOMIDE | PVC          |             | YES |
| NO  |     |     |  |              |              |             | YES |
| %)  |     |     |  |              |              |             |     |
| YES |     |     |  | TEMOZOLOMIDE |              |             | NO  |
| YES |     |     |  | TEMOZOLOMIDE |              |             | YES |
| YES | YES |     |  | TEMOZOLOMIDE | FOTEMUSTINE  |             | YES |
| %)  |     |     |  |              |              |             |     |
| %)  |     |     |  |              |              |             |     |
| NO  |     |     |  |              |              |             | NO  |
| YES |     |     |  | TEMOZOLOMIDE |              |             | YES |
| NO  |     |     |  |              |              |             | NO  |
| YES |     |     |  | TEMOZOLOMIDE |              |             | YES |

YES  
NO  
YES  
YES  
NO  
NO  
NO  
NO  
YES  
YES  
YES  
YES  
YES

TEMOZOLOMIDE

TEMOZOLOMIDE  
TEMOZOLOMIDE

TEMOZOLOMIDE  
TEMOZOLOMIDE  
TEMOZOLOMIDE  
TEMOZOLOMIDE  
TEMOZOLOMIDE

YES  
YES  
YES  
YES  
NO  
NO  
YES  
YES  
YES  
YES  
YES  
YES



| Radiotherapy1_type | STATUS | CRISIS  | CRISIS INTERVENTION | CRISIS AT |         | MODIFY | WHY                               | Antiepileptic1 | Antiepileptic2 | Antiepileptic3 | months_fup |
|--------------------|--------|---------|---------------------|-----------|---------|--------|-----------------------------------|----------------|----------------|----------------|------------|
|                    |        |         |                     | LAST      | CONTROL |        |                                   |                |                |                |            |
| WHOLE BRAIN RT     |        | PC      |                     | 0.00      | NO      | NO     |                                   | OXC            |                |                | 13.00      |
| WHOLE BRAIN RT     |        | PS+PC   | before              |           | YES     | YES    | SIDE EFFECTS+UNCONTROLLED SEIZURE | PHT            | OXC            | LEV            | 13.00      |
| WHOLE BRAIN RT     |        | PC+SGTC | after               |           | YES     | NO     |                                   | LEV            |                |                | 14.00      |
| IMRT               |        | PC      |                     | 0.00      | NO      | YES    | SIDE EFFECTS                      | CBZ            | LEV            |                | 14.00      |
| WHOLE BRAIN RT     |        | PC      | before              |           | YES     | YES    | UNCONTROLLED SEIZURE              | OXC            | LEV            |                | 15.00      |
| WHOLE BRAIN RT     |        | PS      |                     | 0.00      | NO      | NO     |                                   | LEV            |                |                | 18.00      |
| WHOLE BRAIN RT     |        | GTC     |                     | 0.00      | NO      | YES    |                                   | LEV            |                |                | 19.00      |
| WHOLE BRAIN RT     |        | PC      | after               |           | NO      | NO     |                                   | OXC            |                |                | 19.00      |
| WHOLE BRAIN RT     |        | PS      |                     | 0.00      | NO      | YES    | SIDE EFFECTS                      | PG             | TPM            |                | 21.00      |
| WHOLE BRAIN RT     |        | PC      |                     | 0.00      | NO      | NO     |                                   | LEV            |                |                | 24.00      |
|                    |        | PS      | before              |           | NO      | NO     |                                   | LEV            |                |                | 26.00      |
| WHOLE BRAIN RT     |        | PC      |                     | 0.00      | YES     | NO     | UNCONTROLLED SEIZURE              | OXC            | LEV            |                | 26.00      |
|                    |        | PC      | after               |           | YES     | NO     |                                   | LEV            |                |                | 27.00      |
|                    |        | PC+SGTC | before              |           | NO      | YES    | SIDE EFFECTS                      | OXC            | LEV            |                | 28.00      |
|                    |        | PC+SGTC | after               |           | NO      | NO     |                                   | LEV            |                |                | 29.00      |
|                    |        | PC+SGTC | before              |           | NO      | NO     |                                   | OXC            |                |                | 29.00      |
|                    |        | PC+SGTC | before              |           | NO      | YES    | SIDE EFFECTS                      | PHT            | LEV            |                | 29.00      |
|                    |        | PS+SGTC | after               |           | NO      | NO     |                                   | LEV            |                |                | 30.00      |
| WHOLE BRAIN RT     |        | PC+SGTC | before              |           | NO      | YES    | UNCONTROLLED SEIZURE              | OXC            | LEV            |                | 30.00      |
| STEREOTASSICA      |        | PS      | after               |           | NO      | YES    | UNCONTROLLED SEIZURE              | PG             | LEV            |                | 30.00      |
|                    |        | PS      | before              |           | NO      | YES    | SIDE EFFECTS                      | CBZ            | OXC            |                | 30.00      |
|                    |        | PC      | before              |           | NO      | NO     |                                   | OXC            |                |                | 31.00      |
|                    |        | PC      | before              |           | NO      | YES    | UNCONTROLLED SEIZURE              | CBZ            | LEV            |                | 31.00      |
|                    |        | PC+SGTC | before              |           | NO      | NO     |                                   | LEV            |                |                | 32.00      |
|                    |        | PS+SGTC | before              |           | NO      | NO     |                                   | OXC            |                |                | 32.00      |
| STEREOTASSICA      |        | PC+SGTC | before              |           | NO      | NO     |                                   | CBZ            |                |                | 33.00      |
|                    |        | PC      | before              |           | NO      | NO     |                                   | LEV            |                |                | 33.00      |
|                    |        | PC+SGTC | before              |           | NO      | NO     |                                   | OXC            |                |                | 33.00      |
|                    |        | PC      | before              |           | YES     | YES    | UNCONTROLLED SEIZURE              | PHT            | LEV            | OXC            | 33.00      |
|                    |        | PC      | before              |           | NO      | NO     |                                   | LEV            |                |                | 34.00      |
| WHOLE BRAIN RT     |        | PC+SGTC | before              |           | NO      | YES    | SIDE EFFECTS+UNCONTROLLED SEIZURE | CBZ            | OXC            | LEV            | 35.00      |
|                    |        | PC      | before              |           | NO      | NO     |                                   | OXC            |                |                | 36.00      |
|                    |        | PC      | after               |           | NO      | NO     |                                   | OXC            |                |                | 36.00      |
|                    |        | PC+SGTC | before              |           | NO      | NO     |                                   | OXC            |                |                | 37.00      |
|                    |        | PC      | before              |           | NO      | YES    | SIDE EFFECTS                      | PHT            | OXC            |                | 37.00      |
|                    |        | PC      | after               |           | NO      | NO     |                                   | CBZ            |                |                | 38.00      |
|                    |        | PS+SGTC | before              |           | NO      | NO     |                                   | PG             |                |                | 40.00      |
|                    |        | PC      | before              |           | NO      | YES    | SIDE EFFECTS                      | PG             | CBZ            |                | 41.00      |
| WHOLE BRAIN RT     |        | PC+SGTC | after               |           | YES     | YES    | UNCONTROLLED SEIZURE              | PG             | OXC            | LEV            | 45.00      |

|                    |                |         |        |      |     |                      |              |           |         |        |
|--------------------|----------------|---------|--------|------|-----|----------------------|--------------|-----------|---------|--------|
| WHOLE BRAIN RT     |                | PC      | before | YES  | YES | UNCONTROLLED SEIZURE | VPA          | OXC       | LEV     | 50.00  |
| WHOLE BRAIN RT     |                | PC      | before | NO   | YES | UNCONTROLLED SEIZURE | PG           | TPM       | OXC     | 50.00  |
|                    |                | PS+PC   | before |      |     |                      | CBZ          |           |         |        |
|                    |                | PS      | after  | YES  | YES | UNCONTROLLED SEIZURE | OTHER        | LEV       | LEV+CBZ | 15.00  |
|                    |                | PS      | before |      |     |                      | OXC          |           |         |        |
|                    |                | PS      | before |      |     |                      | PG           |           |         | 48.00  |
|                    |                | PC      | before | NO   |     |                      | OXC          |           |         | 96.00  |
|                    |                | PS+SGTC | before |      |     |                      |              |           |         |        |
|                    |                | PS+SGTC | before |      |     |                      | CBZ          |           |         |        |
| IMRT               |                | PS      | before |      |     |                      |              |           |         |        |
|                    |                |         | before | NO   | YES | SCARCE COMPLIANCE    | CBZ          | TPM       | LEV     | 120.00 |
| CONFORMATION AL RT |                | PC      | before | YES  | YES | UNCONTROLLED SEIZURE | LEV          | LEV+OTHER |         | 24.00  |
|                    |                | PC      | before | YES  | YES | UNCONTROLLED SEIZURE | PG           | VPA       | LEV+VPA | 48.00  |
| CONFORMATION AL RT |                | PC+SGTC | before | NO   | NO  |                      | VPA          |           |         | 72.00  |
|                    |                | PC      | before | NO   | YES | SIDE EFFECTS         | VPA          | LEV       |         | 24.00  |
|                    |                | PC      | before | YES  | YES | SIDE EFFECTS         | VPA          | LEV       |         | 29.00  |
|                    |                | PS+SGTC | before | YES  | YES | SIDE EFFECTS         | VPA          | LEV       |         | 24.00  |
| WHOLE BRAIN RT     |                | PC      | before | YES  | YES | UNCONTROLLED SEIZURE | VPA          | LEV+VPA   |         | 33.00  |
|                    |                | PC+SGTC | before | NO   | NO  |                      | VPA          |           |         | 24.00  |
| CONFORMATION AL RT | NOT CONVULSI   | PS      | before | NO   | YES | SE+OTHER             | PHT          | TPM       |         | 228.00 |
|                    | NOT CONVULSI   | PS      | before | NO   | YES | OTHER                | PG           | LEV+PGB   |         | 171.00 |
| CONFORMATION AL RT | NOT CONVULSI   | PS      | before | NO   | NO  |                      | OXC          |           |         | 101.00 |
| CONFORMATION AL RT | NOT CONVULSI   | PS      | before | NO   | YES |                      | VPA          | TPM       |         | 48.00  |
| CONFORMATION AL RT | NOT CONVULSI   | PS      | before | NO   | YES | OTHER                | LEV+OXC      | LEV+TPM   |         | 27.00  |
| CONFORMATION AL RT | NOT CONVULSI   | PS      | before | NO   | NO  |                      | LEV          |           |         | 27.00  |
| CONFORMATION AL RT | NOT CONVULSI   | PS      | before | NO   | NO  |                      | LEV          |           |         | 25.00  |
| WHOLE BRAIN RT     |                | PS      |        | 0.00 | NO  |                      | LEV          |           |         | 16.00  |
| CONFORMATION AL RT | NOT CONVULSI   | PS      | before | YES  | YES | UNCONTROLLED SEIZURE | LEV          | LEV+TPM   |         | 12.00  |
| CONFORMATION AL RT | CONVULSIVE     | PC+SGTC |        | 0.00 | NO  |                      | LEV          |           |         | 18.00  |
|                    | CONVULSIVE     | PC+SGTC |        | 0.00 | NO  |                      | LEV          |           |         | 18.00  |
| CONFORMATION AL RT | NOT CONVULSI   | PS      | before | NO   | YES | OTHER                | PG           | LEV       |         | 101.00 |
| CONFORMATION AL RT | NOT CONVULSI   | PS      | after  | NO   | YES | UNCONTROLLED SEIZURE | LEV          | OXC       | ZNS     | 7.00   |
|                    |                | PS      |        | 0.00 | NO  |                      | LEV          |           |         | 2.00   |
|                    | NOT CONVULSI   | PS      |        | 0.00 | NO  |                      | LEV          |           |         | 2.00   |
|                    | NOT CONVULSI   | PS      |        | 0.00 | NO  |                      | LEV          |           |         | 1.00   |
| CONFORMATION AL RT |                |         |        | 0.00 | NO  | YES                  | SIDE EFFECTS | PHT       | OXC     | 79.00  |
| WHOLE BRAIN RT     |                |         |        | 0.00 | NO  |                      |              |           |         | 27.00  |
| CONFORMATION AL RT |                |         |        | 0.00 | NO  | YES                  | SIDE EFFECTS | CBZ       | OXC     | 57.00  |
|                    |                |         |        | 0.00 | NO  |                      |              |           |         | 28.00  |
|                    |                |         |        | 0.00 | NO  |                      |              |           |         | 24.00  |
| WHOLE BRAIN RT     | NOT CONVULSIVE |         |        | 0.00 | NO  |                      | LEV          |           |         | 14.00  |

|                    |                 |        |      |     |     |                                   |     |     |         |        |
|--------------------|-----------------|--------|------|-----|-----|-----------------------------------|-----|-----|---------|--------|
| WHOLE BRAIN RT     |                 |        | 0.00 | NO  |     |                                   |     |     |         | 11.00  |
| STEREOTASSICA      |                 |        | 0.00 | NO  |     |                                   |     |     |         | 41.00  |
| CONFORMATION AL RT | NOT CONVULSI PS |        | 0.00 | NO  | NO  |                                   | LEV |     |         | 19.00  |
|                    |                 |        | 0.00 | NO  | NO  |                                   | LEV |     |         | 12.00  |
| CONFORMATION AL RT | NOT CONVULSIVE  |        | 0.00 | NO  | NO  |                                   | LEV |     |         | 11.00  |
| CONFORMATION AL RT |                 |        | 0.00 | NO  |     |                                   | LEV |     |         | 10.00  |
| IMRT               |                 |        | 0.00 | NO  | YES | SIDE EFFECTS                      | LEV | PHT |         | 9.00   |
| WHOLE BRAIN RT     | NOT CONVULSI PS |        | 0.00 | NO  |     |                                   | VPA |     |         | 1.00   |
|                    |                 |        | 0.00 | NO  |     |                                   |     |     |         | 7.00   |
| CONFORMATION AL RT | NOT CONVULSI PS | before |      | NO  | YES | OTHER                             | PG  | LEV | LCM+LEV | 36.00  |
| CONFORMATION AL RT |                 |        | 0.00 | NO  | NO  |                                   | LEV |     |         | 5.00   |
| CONFORMATION AL RT |                 |        | 0.00 | NO  |     |                                   | LEV |     |         | 228.00 |
|                    | NOT CONVULSI PS | before |      | YES |     |                                   | VPA |     |         | 2.00   |
| CONFORMATION AL RT |                 |        | 0.00 |     | NO  |                                   | LEV |     |         |        |
|                    | NOT CONVULSIVE  |        | 0.00 | NO  |     |                                   | CBZ |     |         | 5.00   |
|                    | GTC             |        | 0.00 | NO  | NO  |                                   | LEV |     |         | 12.00  |
|                    | PC              | before |      | NO  |     |                                   |     |     |         | 12.00  |
|                    | PC+SGTC         | before |      | YES | YES |                                   | OXC |     |         | 12.00  |
|                    | PC              |        | 0.00 | NO  | YES | UNCONTROLLED SEIZURE              | PG  | OXC |         | 3.00   |
| RADIOSURGERY       | PS              | before |      | YES | NO  |                                   | CBZ |     |         | 0.00   |
|                    | PC              |        | 0.00 | YES | NO  |                                   | CBZ |     |         | 14.00  |
|                    | PC              |        | 0.00 | YES | YES | SIDE EFFECTS+UNCONTROLLED SEIZURE | PG  | CBZ | TGB     | 88.00  |
|                    | PC+SGTC         | before |      | NO  | NO  |                                   | OXC |     |         | 12.00  |
|                    | PS              | before |      | YES | YES | UNCONTROLLED SEIZURE              | PHT | LEV | CBZ     | 8.00   |
| IMRT               | GTC             | before |      | NO  |     |                                   | LEV |     |         | 7.00   |
| IMRT               | PC+SGTC         | before |      | NO  |     |                                   | LEV |     |         | 72.00  |
| WHOLE BRAIN RT     | PS              | before |      | YES | YES | UNCONTROLLED SEIZURE              | PHT | CBZ | ZNS     | 14.00  |
|                    | PC              | before |      | YES | YES | UNCONTROLLED SEIZURE              | CBZ | VPA | LEV     | 30.00  |
| WHOLE BRAIN RT     | PS+SGTC         | before |      | YES | NO  |                                   | LEV | CBZ |         | 6.00   |
|                    | PS              | before |      | YES | YES | SIDE EFFECTS                      | CBZ | OXC | LCM     | 6.00   |
|                    | PS              | before |      | YES | NO  |                                   | PG  |     |         | 6.00   |
|                    | PS              | before |      | YES | NO  |                                   | LEV |     |         | 6.00   |
| WHOLE BRAIN RT     | PS+SGTC         | after  |      | YES | NO  |                                   | LEV |     |         | 6.00   |
|                    | PS+SGTC         | before |      | NO  | YES | UNCONTROLLED SEIZURE              | TPM | CBZ |         | 6.00   |
|                    | PC+SGTC         | after  |      | NO  | YES | UNCONTROLLED SEIZURE              | PG  | CBZ | VPA     | 6.00   |
|                    | PS+SGTC         |        | 0.00 | NO  | NO  |                                   | CBZ | LEV |         | 6.00   |
|                    | PS              | before |      | YES | NO  |                                   | PG  | LCM |         | 6.00   |
|                    | PS+SGTC         | before |      | NO  | YES | SIDE EFFECTS                      | PG  | CBZ | LEV     | 6.00   |
|                    | PS+SGTC         | before |      | NO  | YES | UNCONTROLLED SEIZURE              | CBZ | LEV | TPM     | 6.00   |
|                    | PS              | before |      | NO  | YES | SIDE EFFECTS                      | OXC | LEV |         | 4.00   |
| CONFORMATION AL RT | CONVULSIVE      | before |      | YES | YES | UNCONTROLLED SEIZURE              | PG  | CBZ | LEV     | 2.00   |
| CONFORMATION AL RT | PS+SGTC         | after  |      | YES | YES | SIDE EFFECTS+UNCONTROLLED SEIZURE | PG  | LEV | VPA     | 8.00   |

|                    |              |         |        |      |      |     |                           |       |     |     |  |       |
|--------------------|--------------|---------|--------|------|------|-----|---------------------------|-------|-----|-----|--|-------|
| RADIOSURGERY       |              | PS+SGTC |        | 0.00 | NO   | YES | SIDE EFFECTS              | PG    | LEV |     |  | 4.00  |
| STEREOTASSICA      |              | PS      | before |      | NO   | YES | SIDE EFFECTS              | PG    | OXC |     |  | 12.00 |
| CONFORMATION AL RT |              | PC+SGTC | after  |      | NO   | NO  |                           | OXC   |     |     |  | 5.00  |
|                    |              | PC+SGTC | before |      | NO   | YES | SCARCE COMPLIANCE         | LEV   | TPM |     |  | 30.00 |
| CONFORMATION AL RT |              | PS      | after  |      | NO   | NO  |                           | OXC   |     |     |  | 3.00  |
|                    |              | PS+SGTC | after  |      | NO   | NO  |                           | LEV   |     |     |  | 29.00 |
| CONFORMATION AL RT |              | PS+PC   | before |      | NO   | YES | UNCONTROLLED SEIZURE      | PG    | VPA |     |  | 1.00  |
|                    |              | GTC     | after  |      | NO   | NO  |                           | LEV   |     |     |  | 1.00  |
| CONFORMATION AL RT |              | PS      | before |      | NO   | YES | SIDE EFFECTS              | OXC   | VPA |     |  | 13.00 |
| RADIOSURGERY       |              | PS      | after  |      | YES  | YES | SIDE EFFECTS              | PG    |     |     |  | 11.00 |
| CONFORMATION AL RT |              | PS      | after  |      | YES  | NO  |                           | OTHER |     |     |  | 2.00  |
| IMRT               |              | PS+PC   | before |      | YES  | YES | SIDE EFFECTS              | OXC   | VPA |     |  | 13.00 |
| CONFORMATION AL RT |              | PS      | before |      | YES  | NO  |                           | OXC   |     |     |  | 6.00  |
|                    |              | PC+SGTC | after  |      | NO   | NO  |                           | OXC   |     |     |  | 11.00 |
| CONFORMATION AL RT |              | PS      | after  |      | YES  | YES | UNCONTROLLED SEIZURE      | OXC   | LEV |     |  | 9.00  |
| CONFORMATION AL RT |              | PC      | before |      | NO   | YES | SIDE EFFECTS              | PG    | ZNS |     |  | 5.00  |
|                    |              | PS      | after  |      | YES  | YES | SCARCE COMPLIANCE         | CBZ   | PG  | LEV |  | 32.00 |
|                    |              | PS      | before |      | YES  | YES | SCARCE COMPLIANCE         | OXC   | LEV |     |  | 18.00 |
| CONFORMATION AL RT |              | PS      | after  |      | YES  | YES | UNCONTROLLED SEIZURE      | OXC   | LEV |     |  | 11.00 |
| CONFORMATION AL RT |              | PS      | after  |      | NO   | NO  |                           | OXC   |     |     |  | 9.00  |
|                    | NOT CONVULSI | PS      | before |      | YES  | YES | SIDE EFFECTS+UNCONTROLLEI | OXC   | LEV | ZNS |  | 31.00 |
| CONFORMATION AL RT |              | PC      | before |      | YES  | YES | UNCONTROLLED SEIZURE      | OXC   | LEV |     |  | 13.00 |
|                    |              | PS      | after  |      | NO   | NO  |                           | OXC   |     |     |  | 5.00  |
| CONFORMATION AL RT |              | PS+SGTC | before |      | NO   | NO  |                           | VPA   |     |     |  | 7.00  |
|                    | NOT CONVULSI | PS+SGTC | before |      | NO   | YES | UNCONTROLLED SEIZURE      | PG    | OXC |     |  | 34.00 |
| WHOLE BRAIN RT     |              | PS+SGTC |        |      | 0.00 | NO  |                           | OXC   |     |     |  | 17.00 |
| IMRT               |              | PS+PC   | after  |      | YES  | YES | UNCONTROLLED SEIZURE      | LEV   | OXC |     |  | 14.00 |
| CONFORMATION AL RT |              | GTC     | after  |      | NO   | NO  |                           | LEV   |     |     |  | 19.00 |
| CONFORMATION AL RT |              | PC+SGTC | before |      | NO   | YES | SIDE EFFECTS              | LEV   | OXC |     |  | 4.00  |
| CONFORMATION AL RT |              | PS+PC   | after  |      | YES  | YES | UNCONTROLLED SEIZURE      | PG    | OXC | VPA |  | 18.00 |
| CONFORMATION AL RT |              | PS+PC   | after  |      | YES  | NO  |                           | LEV   |     |     |  | 3.00  |
| CONFORMATION AL RT |              | GTC     | after  |      | NO   | YES | SIDE EFFECTS              | PG    | LEV |     |  | 11.00 |
| CONFORMATION AL RT |              | PS+SGTC | before |      | NO   | YES | SIDE EFFECTS              | CBZ   | LEV |     |  | 47.00 |
| IMRT               | CONVULSIVE   | PS      | before |      | NO   | YES | UNCONTROLLED SEIZURE      | PG    | LEV | VPA |  | 10.00 |
| WHOLE BRAIN RT     |              | PS      |        |      | 0.00 | YES |                           | LEV   |     |     |  | 1.00  |
| CONFORMATION AL RT |              | PS      | before |      | YES  | YES | UNCONTROLLED SEIZURE      | OXC   | LEV | VPA |  | 15.00 |
| CONFORMATION AL RT |              | PS+PC   | after  |      | NO   | YES | UNCONTROLLED SEIZURE      | PG    | LEV |     |  | 39.00 |
| IMRT               | NOT CONVULSI | PS+SGTC |        |      | 0.00 | NO  | SIDE EFFECTS+UNCONTROLLEI | OXC   | CBZ | VPA |  | 5.00  |
| CONFORMATION AL RT |              | PS      | before |      | YES  | YES | SIDE EFFECTS+UNCONTROLLEI | PG    | TPM | LEV |  | 16.00 |
| CONFORMATION AL RT |              | PS      | before |      | YES  | YES | SCARCE COMPLIANCE         | LEV   | CBZ | LCM |  | 11.00 |
|                    |              | PC      | before |      | NO   | YES | SCARCE COMPLIANCE         | CBZ   | OXC | LEV |  | 3.00  |
| CONFORMATION AL RT |              | PS      | before |      | NO   | NO  |                           | CBZ   |     |     |  | 1.00  |

|                    |              |         |              |      |     |     |                           |       |       |       |        |
|--------------------|--------------|---------|--------------|------|-----|-----|---------------------------|-------|-------|-------|--------|
| CONFORMATION AL RT |              | PS+SGTC |              | 0.00 | NO  | YES | SIDE EFFECTS              | CBZ   | LEV   |       | 12.00  |
| CONFORMATION AL RT |              | PS+SGTC | before       |      | YES | YES | UNCONTROLLED SEIZURE      | OXC   | LEV   |       | 14.00  |
| CONFORMATION AL RT | NOT CONVULSI | PC+SGTC | before       |      | YES | NO  |                           | OXC   |       |       | 8.00   |
| WHOLE BRAIN RT     |              | PS+SGTC | after        |      | NO  | YES | SCARCE COMPLIANCE         | PG    | OXC   |       | 11.00  |
| CONFORMATION AL RT |              | PS      | after        |      | NO  | NO  |                           | LEV   |       |       | 5.00   |
|                    |              | PS      | after        |      | YES | YES | SIDE EFFECTS+UNCONTROLLEI | OXC   | LEV   | OTHER | 22.00  |
| RADIOSURGERY       |              | PS      | before       |      | YES | YES | UNCONTROLLED SEIZURE      | TPM   | LEV   |       | 28.00  |
| IMRT               | NOT CONVULSI | PC+SGTC | after        |      | YES | YES | SIDE EFFECTS+UNCONTROLLEI | PG    | OXC   | CBZ   | 17.00  |
|                    |              | PS+SGTC | after        |      | NO  | YES | SIDE EFFECTS              | PG    | LEV   |       | 32.00  |
| CONFORMATION AL RT |              | PS      | before       |      | NO  | NO  |                           | LEV   |       |       | 7.00   |
| CONFORMATION AL RT |              | PC+SGTC | after        |      | NO  | YES | SIDE EFFECTS              | OXC   | LEV   | VPA   | 36.00  |
|                    |              | PC      |              | 0.00 | NO  | NO  |                           | LEV   |       |       | 5.00   |
|                    | CONVULSIVE   | PC+SGTC | before       |      | YES | YES | UNCONTROLLED SEIZURE      | PG    | PHT   |       | 48.00  |
| WHOLE BRAIN RT     |              | PS      | before       |      |     | NO  |                           | LEV   |       |       | 1.00   |
| WHOLE BRAIN RT     |              | PS      | before       |      | NO  | NO  |                           | PHT   |       |       | 4.00   |
| WHOLE BRAIN RT     |              | PC      |              | 0.00 | YES | YES | UNCONTROLLED SEIZURE      | PG    | LEV   |       | 1.00   |
|                    |              | PC      | before       |      |     | YES | UNCONTROLLED SEIZURE      | PG    | PHT   | LEV   | 2.00   |
| WHOLE BRAIN RT     |              | PS+PC   | before       |      | NO  | YES | UNCONTROLLED SEIZURE      | LEV   | TPM   |       | 10.00  |
| WHOLE BRAIN RT     |              | PS      |              | 0.00 |     | NO  |                           | TPM   |       |       | 1.00   |
| WHOLE BRAIN RT     |              | PC      | after        |      | YES | YES | UNCONTROLLED SEIZURE      | PHT   | PG    |       | 1.00   |
|                    |              | PC      | before       |      |     |     |                           | LEV   |       |       | 1.00   |
|                    |              | PS+PC   |              | 0.00 | NO  | NO  |                           | CBZ   |       |       | 5.00   |
| WHOLE BRAIN RT     |              | PS      | before       |      |     | YES | UNCONTROLLED SEIZURE      | TPM   | CBZ   |       | 18.00  |
|                    |              | PC      | before       |      | YES | YES | UNCONTROLLED SEIZURE      | VPA   | LEV   | CBZ   | 40.00  |
|                    |              | PC+SGTC | before       |      | NO  | YES | UNCONTROLLED SEIZURE      | PG    | LEV   | CBZ   | 14.00  |
|                    | CONVULSIVE   | PS+SGTC | before       |      | YES | YES | SIDE EFFECTS              | OXC   | PG    |       | 23.00  |
|                    |              | PS      | before       |      | YES | NO  |                           | PHT   | OTHER |       | 4.00   |
| IMRT               |              | GTC     | before+after |      | YES | NO  |                           | LEV   |       |       | 0.00   |
| IMRT               |              | PC      | before       |      | NO  | NO  |                           | VPA   |       |       | 41.00  |
|                    |              | GTC     | before       |      | NO  | YES | UNCONTROLLED SEIZURE      | OTHER | CBZ   |       | 34.00  |
|                    |              | PC      | before       |      | NO  | NO  |                           | CBZ   |       |       | 34.00  |
|                    |              | PC      | before       |      | NO  | NO  |                           | OTHER |       |       | 43.00  |
|                    |              | PS+SGTC | before+after |      | YES | YES | UNCONTROLLED SEIZURE      | OTHER | VPA   |       | 29.00  |
|                    |              | PC      | before       |      | NO  | NO  |                           | VPA   |       |       | 43.00  |
| IMRT               |              | PS+SGTC | after        |      | NO  | YES | SIDE EFFECTS+UNCONTROLLEI | PG    | OXC   | LEV   | 42.00  |
|                    |              | PC+SGTC | after        |      | YES | YES | UNCONTROLLED SEIZURE      | LEV   | LCM   |       | 12.00  |
|                    |              | GTC     | after        |      | NO  |     |                           | LEV   |       |       | 30.00  |
|                    |              | PS      | after        |      | NO  | YES | UNCONTROLLED SEIZURE      | OXC   | LEV   | TPM   | 100.00 |
|                    |              | PC      | before       |      | YES | YES | SIDE EFFECTS              | PG    | LEV   |       | 24.00  |
|                    |              | PS      | before       |      | NO  | YES | SIDE EFFECTS+UNCONTROLLEI | PG    | LEV   |       | 43.00  |
| IMRT               |              | GTC     | before       |      | NO  | YES | UNCONTROLLED SEIZURE      | PG    | OXC   | VPA   | 72.00  |
|                    |              | PC+SGTC | before       |      | NO  | YES | UNCONTROLLED SEIZURE      | PG    | LEV   | LTG   | 55.00  |

|                |         |        |     |     |                           |     |     |     |        |
|----------------|---------|--------|-----|-----|---------------------------|-----|-----|-----|--------|
|                | PS+SGTC | before | YES | YES | UNCONTROLLED SEIZURE      | VPA | LEV | PGB | 48.00  |
| IMRT           | PC+SGTC | after  | YES | YES | UNCONTROLLED SEIZURE      | CBZ | LEV |     | 24.00  |
| WHOLE BRAIN RT | PS      | before | NO  | NO  |                           | LEV | ZNS |     | 14.00  |
| IMRT           | GTC     | before | YES | YES | UNCONTROLLED SEIZURE      | CBZ | LEV | LCM | 61.00  |
|                | PS      | before | YES | YES | UNCONTROLLED SEIZURE      | LEV | VPA | PG  | 132.00 |
|                | GTC     | before | NO  | YES | UNCONTROLLED SEIZURE      | LEV | TPM | PGB | 45.00  |
|                | PC+SGTC | before | NO  | YES | UNCONTROLLED SEIZURE      | LEV | LEV |     | 93.00  |
|                | PC+SGTC | before | NO  | NO  |                           | PG  |     |     | 88.00  |
| STEREOTASSICA  | GTC     | before | NO  | NO  |                           | PG  |     |     | 14.00  |
|                | PS      | before | NO  | NO  |                           | TPM |     |     | 84.00  |
| WHOLE BRAIN RT | GTC     | before | NO  | YES | UNCONTROLLED SEIZURE      | OXC | LTG | PG  | 63.00  |
|                | GTC     | after  | NO  |     |                           | PG  |     |     | 14.00  |
| WHOLE BRAIN RT | PC+SGTC | before | NO  | YES | SCARCE COMPLIANCE         | PG  | OXC |     | 27.00  |
| WHOLE BRAIN RT | GTC     | before | NO  | YES | UNCONTROLLED SEIZURE      | OXC |     |     | 12.00  |
|                | PS      | before | NO  | YES | SCARCE COMPLIANCE         | PHT | LTG |     | 52.00  |
| IMRT           | PS+SGTC | before | NO  | YES | SCARCE COMPLIANCE         | PG  | OXC |     | 63.00  |
| IMRT           | PC+SGTC | before | NO  |     |                           | LEV |     |     | 36.00  |
| WHOLE BRAIN RT | PS      | after  | NO  |     |                           | LEV |     |     | 29.00  |
|                | GTC     | before | NO  | YES | UNCONTROLLED SEIZURE      | CBZ | TPM |     | 70.00  |
|                | PS      | after  | NO  | NO  |                           | LEV |     |     | 16.00  |
|                | PS      | before | NO  | YES | UNCONTROLLED SEIZURE      | PG  | LEV |     | 16.00  |
|                | PS      | before | NO  | NO  |                           | LEV |     |     | 29.00  |
|                | PS      | before | NO  | YES | UNCONTROLLED SEIZURE      | LEV | PG  |     | 14.00  |
| IMRT           | PC+SGTC | before | YES | YES | UNCONTROLLED SEIZURE      | CBZ | LCM |     | 108.00 |
| IMRT           | PS+SGTC | before | NO  | YES | SCARCE COMPLIANCE         | PG  | VPA |     | 117.00 |
|                | PC+SGTC | before | NO  | YES | UNCONTROLLED SEIZURE      | OXC | CBZ | TPM | 84.00  |
| IMRT           | PC+SGTC | before | NO  | YES | SCARCE COMPLIANCE         | CBZ |     |     | 72.00  |
|                | PS      | before | NO  |     |                           | TPM |     |     | 83.00  |
|                | PC      | before | NO  | YES | UNCONTROLLED SEIZURE      | CBZ | ZNS |     | 96.00  |
|                | PC      | after  | YES | YES | UNCONTROLLED SEIZURE      | CBZ | LEV |     | 144.00 |
|                | PS+SGTC | before | YES | YES | UNCONTROLLED SEIZURE      | LEV | OXC |     | 15.00  |
|                | PC+SGTC | after  | NO  | NO  |                           | LEV |     |     | 12.00  |
| IMRT           | PC      | before | YES | NO  |                           | LEV |     |     | 12.00  |
|                | PC      | after  | NO  | YES | SCARCE COMPLIANCE         | LEV | OXC |     | 12.00  |
| WHOLE BRAIN RT | GTC     | before | NO  | NO  |                           | LEV |     |     | 108.00 |
|                | GTC     | before | YES | YES | UNCONTROLLED SEIZURE      | CBZ | OXC | LEV | 12.00  |
|                | PC      | before | NO  | YES | UNCONTROLLED SEIZURE      | LEV | LTG | TPM | 12.00  |
|                | PC      | before | YES | YES | UNCONTROLLED SEIZURE      | PG  | LEV | CBZ | 17.00  |
|                | GTC     | after  | NO  | NO  |                           | PG  |     |     | 192.00 |
|                | PS      | after  | YES | YES | UNCONTROLLED SEIZURE      | PG  | OXC | LCM | 16.00  |
|                | PC+SGTC | before | NO  | YES | SIDE EFFECTS+UNCONTROLLEI | OXC | PG  | PHT | 27.00  |
|                | GTC     | before | NO  | YES | UNCONTROLLED SEIZURE      | PHT | CBZ |     | 33.00  |

|                |         |        |     |     |                           |     |     |     |        |
|----------------|---------|--------|-----|-----|---------------------------|-----|-----|-----|--------|
|                | PS      | before | NO  | YES | SE+OTHER                  | LEV | CBZ | TPM | 14.00  |
| IMRT           | PC      | before | YES | YES | UNCONTROLLED SEIZURE      | PG  | LEV |     | 24.00  |
| WHOLE BRAIN RT | PC      | before | YES |     |                           | LEV |     |     | 19.00  |
| WHOLE BRAIN RT | PC+SGTC | after  | NO  | NO  |                           | OXC |     |     | 5.00   |
| WHOLE BRAIN RT | PC      | after  | NO  | NO  |                           | PG  |     |     | 12.00  |
| WHOLE BRAIN RT | PC+SGTC | before | NO  | NO  |                           | TPM |     |     | 132.00 |
|                | PS+SGTC | before | NO  | YES | UNCONTROLLED SEIZURE      | PG  | LEV | PHT | 19.00  |
|                | PS+SGTC | after  | NO  | YES | UNCONTROLLED SEIZURE      | LEV | CBZ | TPM | 36.00  |
| STEREOTASSICA  | PC+SGTC | before | NO  | YES | UNCONTROLLED SEIZURE      | LTG | LEV | LCM | 34.00  |
| IMRT           | PS+SGTC | before | YES | YES | UNCONTROLLED SEIZURE      | LEV | PGB | LCM | 12.00  |
| IMRT           | PS      | before | YES | YES | UNCONTROLLED SEIZURE      | PG  | LEV |     | 12.00  |
|                | PC+SGTC | before | NO  | NO  |                           | OXC |     |     | 46.00  |
|                | PS      | before | YES | YES | UNCONTROLLED SEIZURE      | TPM | PGB |     | 65.00  |
|                | GTC     | before | YES |     |                           | LEV |     |     | 24.00  |
|                | GTC     | before | NO  | NO  |                           | LEV |     |     | 24.00  |
| WHOLE BRAIN RT | PC      | after  | YES | YES | UNCONTROLLED SEIZURE      | LEV | LCM |     | 11.00  |
|                | GTC     | before | YES | YES | UNCONTROLLED SEIZURE      | LEV | LCM |     | 12.00  |
| WHOLE BRAIN RT | PS      | after  | NO  | NO  |                           | LEV |     |     | 12.00  |
| WHOLE BRAIN RT | PC+SGTC | before | YES | YES | UNCONTROLLED SEIZURE      | LEV | PHT |     | 36.00  |
|                | GTC     | after  | NO  | YES | SCARCE COMPLIANCE         | PG  | TPM |     | 6.00   |
| WHOLE BRAIN RT | PS      | before | NO  | YES | UNCONTROLLED SEIZURE      | OXC | LEV |     | 12.00  |
| STEREOTASSICA  | PS+SGTC | before | YES | YES | SIDE EFFECTS+UNCONTROLLED | PHT | LEV | PG  | 6.00   |
| WHOLE BRAIN RT | PS      | after  | NO  |     |                           | PG  | LEV |     | 6.00   |
| WHOLE BRAIN RT | PS      | after  | YES | YES | UNCONTROLLED SEIZURE      | OXC | LEV |     | 6.00   |
| WHOLE BRAIN RT | PS      | after  | NO  | NO  |                           | LEV |     |     | 6.00   |
| WHOLE BRAIN RT | PC      | after  | YES | YES | UNCONTROLLED SEIZURE      | LEV | PGB |     | 12.00  |
| WHOLE BRAIN RT | PS      | after  | NO  | NO  |                           | OXC |     |     | 8.00   |
| STEREOTASSICA  | PC      | after  | NO  |     |                           | LEV |     |     | 72.00  |
|                | PS      | before | YES | YES | UNCONTROLLED SEIZURE      | OXC | LCM |     | 96.00  |
| WHOLE BRAIN RT | PS      | before | NO  | YES | SIDE EFFECTS              | LEV | OXC |     | 24.00  |
|                | PS      | before | NO  | YES | SIDE EFFECTS              | LEV | OXC |     | 5.00   |
| WHOLE BRAIN RT | PC+SGTC | after  | YES | YES | SCARCE COMPLIANCE         | PG  | LEV |     | 12.00  |
|                |         | after  | NO  |     |                           | PG  |     |     | 6.00   |
| RADIOSURGERY   | PS+SGTC | after  | NO  |     |                           | PG  |     |     | 10.00  |
| WHOLE BRAIN RT | PC      | after  | NO  | YES | UNCONTROLLED SEIZURE      | LEV | TPM |     | 4.00   |
|                |         | before | NO  |     |                           | CBZ |     |     | 4.00   |
|                | PS+SGTC | after  | NO  |     |                           | TPM |     |     | 23.00  |
|                | PC+SGTC | after  | NO  |     |                           | OXC |     |     | 6.00   |
| STEREOTASSICA  | PS+SGTC | after  | NO  |     |                           | PG  |     |     | 4.00   |
|                |         | after  | NO  |     |                           | LEV |     |     | 3.00   |
| WHOLE BRAIN RT | PS+SGTC | after  | NO  |     |                           | PG  |     |     | 20.00  |
|                | PS+SGTC | after  | NO  |     |                           | OXC |     |     | 6.00   |

|                    |         |        |          |     |                      |  |       |     |     |       |
|--------------------|---------|--------|----------|-----|----------------------|--|-------|-----|-----|-------|
|                    | PS      | after  | NO       |     |                      |  | LEV   |     |     | 8.00  |
| WHOLE BRAIN RT     | PS+SGTC | after  | NO       |     |                      |  | LEV   |     |     | 23.00 |
|                    | GTC     | before | NO       | YES | SIDE EFFECTS         |  | PG    | OXC |     |       |
|                    | PS+SGTC |        | 0.00 YES | NO  |                      |  | OXC   |     |     | 12.00 |
|                    | GTC     | before | NO       | YES | SIDE EFFECTS         |  | PHT   | PG  | LEV | 8.00  |
|                    | PS      |        | 0.00 NO  | NO  |                      |  | OXC   |     |     |       |
|                    | PS+SGTC |        | 0.00 NO  | NO  |                      |  | PG    | LEV |     |       |
| CONFORMATION AL RT | PC      | before | NO       | NO  |                      |  | OTHER |     |     | 43.00 |
| IMRT               |         |        | 0.00 NO  |     |                      |  |       |     |     |       |
| WHOLE BRAIN RT     | PC      | after  | NO       | YES | SIDE EFFECTS         |  | PGB   | PG  | LEV | 6.00  |
|                    | PC      | before | NO       |     |                      |  | PG    |     |     | 26.00 |
| WHOLE BRAIN RT     | PC      |        | 0.00     |     |                      |  | LEV   |     |     | 10.00 |
|                    | PC      | before | NO       | YES |                      |  | PG    | OXC |     | 1.00  |
| WHOLE BRAIN RT     | PC      | after  | NO       | YES | SIDE EFFECTS         |  | PG    | LEV |     | 18.00 |
|                    | PS      | before | NO       |     |                      |  | PG    |     |     | 48.00 |
| IMRT               | PC      |        | 0.00 NO  |     |                      |  | LEV   |     |     | 36.00 |
| IMRT               | PC      | before | NO       | YES | SIDE EFFECTS         |  | PG    | PHT | LEV | 2.00  |
|                    | PS      | before | NO       | YES | SIDE EFFECTS         |  | PG    | CBZ | TPM | 12.00 |
|                    | PC      | before | NO       |     |                      |  | CBZ   |     |     | 48.00 |
|                    | PC      | before | NO       |     |                      |  | LEV   |     |     | 36.00 |
|                    | PC      | after  | NO       |     |                      |  | PG    |     |     | 60.00 |
| WHOLE BRAIN RT     |         |        | 0.00 NO  | YES | SIDE EFFECTS         |  | PG    | LEV |     | 3.00  |
| WHOLE BRAIN RT     | PS      | before | NO       | YES | SIDE EFFECTS         |  | CBZ   | PG  | PHT | 45.00 |
| WHOLE BRAIN RT     | PC      | before | NO       | YES | SIDE EFFECTS         |  | PG    | LEV |     | 48.00 |
| IMRT               | PC      | before | NO       | YES | SIDE EFFECTS         |  | LEV   | PGB |     | 8.00  |
|                    | PC      | before | NO       |     |                      |  | LEV   |     |     | 41.00 |
| WHOLE BRAIN RT     | PC      |        | 0.00 NO  | YES | SIDE EFFECTS         |  | PHT   | LEV |     | 40.00 |
| WHOLE BRAIN RT     | PC      | before | NO       | NO  |                      |  | LEV   | PG  |     |       |
|                    | PC      | before | NO       |     |                      |  | PG    |     |     |       |
| IMRT               | PC      | before | NO       |     |                      |  | PG    | LEV |     | 1.00  |
|                    | PC      |        | 0.00 NO  | YES | SIDE EFFECTS         |  | PG    |     |     | 10.00 |
|                    |         |        | 0.00 NO  |     |                      |  | CBZ   | PG  |     |       |
| WHOLE BRAIN RT     | PC      | after  | NO       |     |                      |  | LEV   |     |     | 12.00 |
|                    | PC      | before | YES      |     |                      |  | PG    | OXC |     | 31.00 |
| WHOLE BRAIN RT     | PC      | before | NO       | YES | SIDE EFFECTS         |  | PG    | LEV |     | 36.00 |
| IMRT               | PC      | after  | NO       |     |                      |  | PG    |     |     | 15.00 |
|                    | PC      | before | NO       |     |                      |  | LEV   |     |     | 60.00 |
|                    | PC      | after  | NO       |     |                      |  | LEV   |     |     | 60.00 |
| WHOLE BRAIN RT     | PC      | after  | NO       |     |                      |  | PG    |     |     | 6.00  |
| CONFORMATION AL RT | PC      | before | YES      | YES | UNCONTROLLED SEIZURE |  | CBZ   | PG  |     | 42.00 |
|                    | PS+PC   | before | NO       | NO  |                      |  | OTHER |     |     | 30.00 |
|                    | PS+PC   | after  | NO       | YES | UNCONTROLLED SEIZURE |  | PG    | VPA | CBZ | 93.00 |



|                    |         |        |          |     |                           |     |       |       |        |
|--------------------|---------|--------|----------|-----|---------------------------|-----|-------|-------|--------|
|                    | PC      | after  | NO       | YES | UNCONTROLLED SEIZURE      | LEV | LTG   |       | 123.00 |
| CONFORMATION AL RT | PS      | after  | NO       | YES | UNCONTROLLED SEIZURE      | PG  | VPA   | TPM   | 53.00  |
|                    | PS      |        | 0.00 NO  |     |                           | PHT | PG    |       | 138.00 |
|                    | PC+SGTC | before | NO       |     |                           | CBZ | TGB   |       | 122.00 |
|                    | PC      | before | NO       |     |                           | LEV |       |       | 36.00  |
|                    | PC+SGTC | before | NO       |     |                           | LEV | CBZ   |       | 14.00  |
|                    | PC+SGTC | before | YES      |     |                           | PG  | PHT   |       | 2.00   |
|                    | PC      | after  | NO       |     |                           | CBZ | LTG   | TGB   | 36.00  |
|                    | PS      | before | YES      |     |                           | TPM | CBZ   |       | 0.00   |
|                    | PS      | before | YES      |     | UNCONTROLLED SEIZURE      | CBZ | PG    | OTHER | 74.00  |
|                    | PC+SGTC | before | YES      | YES | UNCONTROLLED SEIZURE      | CBZ | PG    | TPM   | 27.00  |
|                    | PC      | before | YES      | YES | UNCONTROLLED SEIZURE      | PG  | TGB   | CBZ   | 21.00  |
|                    | PC      | before | YES      | YES | UNCONTROLLED SEIZURE      | PG  | CBZ   | TGB   | 21.00  |
|                    | PC      | before | YES      | YES | UNCONTROLLED SEIZURE      | PHT | PG    | CBZ   | 116.00 |
|                    |         | before | YES      | YES | UNCONTROLLED SEIZURE      | CBZ | TGB   | TPM   | 204.00 |
|                    | PS+SGTC | before | YES      | YES | UNCONTROLLED SEIZURE      | CBZ | TGB   | OXC   | 180.00 |
|                    | PS      |        | 0.00     |     |                           |     |       |       |        |
|                    | PC      |        | 0.00 YES | YES | UNCONTROLLED SEIZURE      | PG  | PHT   | TGB   | 116.00 |
|                    | PC      | before | YES      | YES | UNCONTROLLED SEIZURE      | CBZ | OTHER | PG    | 383.00 |
|                    | PC      | before | NO       | NO  |                           | CBZ | OXC   | LEV   | 6.00   |
| CONFORMATION AL RT | PS      | before | NO       | YES | SIDE EFFECTS              | VPA | LEV   |       | 96.00  |
| CONFORMATION AL RT | PS      | before | NO       | YES | SIDE EFFECTS              | VPA | LEV   |       | 24.00  |
|                    | PS+SGTC | before | NO       | NO  |                           | LEV |       |       | 12.00  |
|                    | PC+SGTC | before | NO       | NO  |                           | LEV |       |       | 11.00  |
|                    | PC      | before | NO       | NO  |                           | LEV |       |       | 25.00  |
|                    | PC      | before | NO       | NO  |                           | LEV |       |       | 23.00  |
|                    | PS      | before | YES      | NO  |                           | LEV |       |       | 32.00  |
| CONFORMATION AL RT | PC+SGTC | before | YES      | YES | UNCONTROLLED SEIZURE      | CBZ | LEV   |       | 38.00  |
| CONFORMATION AL RT | PS      | before | NO       | NO  |                           | LEV | LCM   |       | 9.00   |
| CONFORMATION AL RT | PS      | before | YES      | YES | SIDE EFFECTS+UNCONTROLLEI | CBZ | LEV   |       | 76.00  |
| CONFORMATION AL RT | PS      | before | NO       | NO  |                           | LEV |       |       | 40.00  |
|                    | PC      | before | NO       | NO  |                           | OXC |       |       | 46.00  |
| CONFORMATION AL RT | PS+SGTC | before | NO       | NO  |                           | VPA | LEV   | LCM   | 84.00  |
| CONFORMATION AL RT | PS+SGTC | before | NO       | YES | SIDE EFFECTS+UNCONTROLLEI | VPA | LEV   | LTG   | 108.00 |
| CONFORMATION AL RT | PS      | before | NO       | NO  |                           | LEV |       |       | 25.00  |
| CONFORMATION AL RT | PS      | before | YES      | YES | SIDE EFFECTS+UNCONTROLLEI | CBZ | VPA   | LEV   | 41.00  |
| CONFORMATION AL RT | PC      | before | NO       | NO  |                           | LEV |       |       | 76.00  |
|                    | PS      | before | NO       | NO  |                           | LEV |       |       | 96.00  |
| CONFORMATION AL RT | PS      | before | YES      | NO  |                           | LEV | LCM   |       | 10.00  |
| CONFORMATION AL RT |         | before | NO       | NO  |                           | LEV |       |       | 15.00  |
|                    | PS+SGTC | before | NO       | YES | UNCONTROLLED SEIZURE      | VPA | LEV   |       | 96.00  |
| CONFORMATION AL RT | PS+SGTC | before | NO       | YES | SIDE EFFECTS+UNCONTROLLEI | CBZ | PHT   | OXC   | 72.00  |

|                    |         |        |      |     |                      |                      |       |     |        |
|--------------------|---------|--------|------|-----|----------------------|----------------------|-------|-----|--------|
|                    | PS+SGTC | before | NO   | NO  |                      | LEV                  |       |     | 30.00  |
|                    | PC      | before | NO   | NO  |                      | OXC                  |       |     | 36.00  |
| CONFORMATION AL RT | PS+SGTC | after  | YES  | NO  |                      | CBZ                  |       |     | 18.00  |
| CONFORMATION AL RT | PS      | before | YES  | NO  |                      | LEV                  |       |     | 25.00  |
| CONFORMATION AL RT | PS      | after  | NO   | NO  |                      | LEV                  |       |     | 15.00  |
| CONFORMATION AL RT | PS+SGTC | before | YES  | YES | UNCONTROLLED SEIZURE | OXC                  | ZNS   |     | 23.00  |
| CONFORMATION AL RT | PS+SGTC | before | NO   | NO  |                      | PG                   |       |     | 28.00  |
| CONFORMATION AL RT | PS+SGTC | after  | NO   | NO  |                      | LEV                  |       |     | 18.00  |
| CONFORMATION AL RT | PS      | after  | NO   | YES | UNCONTROLLED SEIZURE | CBZ                  | LEV   |     | 28.00  |
| CONFORMATION AL RT | PS+SGTC | after  | NO   | NO  |                      | PG                   |       |     | 8.00   |
| CONFORMATION AL RT | PS+SGTC | before | NO   | NO  |                      | VPA                  |       |     | 31.00  |
| CONFORMATION AL RT | PS+SGTC | after  | NO   | NO  |                      | LEV                  |       |     | 24.00  |
| CONFORMATION AL RT | PC      | after  | NO   | YES | UNCONTROLLED SEIZURE | OXC                  | LEV   |     | 15.00  |
| CONFORMATION AL RT | PS      | after  | NO   | YES | UNCONTROLLED SEIZURE | CBZ                  | LEV   |     | 78.00  |
| CONFORMATION AL RT | PS      | before | YES  | NO  |                      | LEV                  |       |     | 13.00  |
| CONFORMATION AL RT | PS+SGTC | before | YES  | NO  |                      | PG                   | VPA   |     | 11.00  |
| CONFORMATION AL RT | PS      | before | NO   | NO  |                      | PG                   |       |     | 10.00  |
| CONFORMATION AL RT | PS+SGTC | before | NO   | YES | UNCONTROLLED SEIZURE | CBZ                  | LEV   |     | 66.00  |
| CONFORMATION AL RT | PS+SGTC | after  | NO   | NO  |                      | VPA                  |       |     | 16.00  |
| CONFORMATION AL RT | PS      | before | NO   | YES | UNCONTROLLED SEIZURE | LEV                  | OXC   |     | 13.00  |
| CONFORMATION AL RT | PS      | after  | NO   | NO  |                      | LEV                  |       |     | 13.00  |
| CONFORMATION AL RT | PC      | after  | NO   | NO  |                      | PG                   |       |     | 77.00  |
| CONFORMATION AL RT | PS+SGTC | before | NO   | NO  |                      | PG                   |       |     | 57.00  |
| CONFORMATION AL RT | PS+SGTC | before | YES  | YES | UNCONTROLLED SEIZURE | CBZ                  | VPA   | PG  | 83.00  |
| CONFORMATION AL RT | PS      | before | YES  | YES | UNCONTROLLED SEIZURE | CBZ                  | LEV   |     | 22.00  |
| CONFORMATION AL RT | PS+SGTC | after  | NO   | NO  |                      | LEV                  |       |     | 20.00  |
| CONFORMATION AL RT | PS      | after  | NO   | NO  |                      | LEV                  |       |     | 36.00  |
| CONFORMATION AL RT | PS+SGTC | after  | NO   | NO  |                      | LEV                  |       |     | 38.00  |
| CONFORMATION AL RT | PC      | after  | NO   | NO  |                      | CBZ                  |       |     | 48.00  |
| CONFORMATION AL RT | PS+SGTC | after  | NO   | NO  |                      | VPA                  |       |     | 24.00  |
| CONFORMATION AL RT | PS      | before | YES  | NO  |                      | VPA                  |       |     | 13.00  |
| CONFORMATION AL RT | PS+SGTC | after  | NO   | NO  |                      | PG                   |       |     | 39.00  |
| CONFORMATION AL RT | PS+SGTC | after  | NO   | YES | SIDE EFFECTS         | PG                   | LEV   |     | 16.00  |
| CONFORMATION AL RT | PS+SGTC | before | NO   | YES | SIDE EFFECTS         | PG                   | VPA   |     | 14.00  |
| CONFORMATION AL RT | PS+SGTC | after  | YES  | YES | UNCONTROLLED SEIZURE | PG                   | LEV   | TPM | 23.00  |
| CONFORMATION AL RT | PS+SGTC | before | NO   | NO  |                      | VPA                  |       |     | 26.00  |
| WHOLE BRAIN RT     | PS+PC   | before | YES  | YES | SIDE EFFECTS         | OXC                  | LEV   | LCM | 8.00   |
|                    | PS      | after  | NO   | YES | UNCONTROLLED SEIZURE | VPA                  | OTHER |     | 37.00  |
|                    | PS      | before | YES  | YES | UNCONTROLLED SEIZURE | VPA                  | CBZ   |     | 423.00 |
|                    | PS+SGTC |        | 0.00 | YES | YES                  | UNCONTROLLED SEIZURE | OXC   | CBZ | 38.00  |
|                    | PC      | before | NO   | YES | SIDE EFFECTS         | VPA                  | LEV   |     | 104.00 |
|                    | PC+SGTC | before | NO   | YES | UNCONTROLLED SEIZURE | PHT                  | PG    | CBZ | 92.00  |

|                |         |        |      |     |                      |              |       |       |        |
|----------------|---------|--------|------|-----|----------------------|--------------|-------|-------|--------|
|                | PS+PC   | before | NO   | YES | SIDE EFFECTS         | PG           | PHT   | LEV   | 87.00  |
|                | PS+SGTC | before | YES  | YES | UNCONTROLLED SEIZURE | CBZ          | LEV   |       | 22.00  |
|                | PS      | before | NO   | YES | SIDE EFFECTS         | OXC          | OTHER | CBZ   | 75.00  |
|                | PS      | after  | YES  | NO  |                      | LTG          |       |       | 35.00  |
|                | PS      | before | NO   | YES | UNCONTROLLED SEIZURE | VPA          | LEV   |       | 159.00 |
|                | PS      | before | NO   | YES | UNCONTROLLED SEIZURE | VPA          | CBZ   | LCM   | 99.00  |
|                | PS      | before | YES  | YES | SIDE EFFECTS         | CBZ          | LEV   |       | 39.00  |
|                | PS      |        | 0.00 | NO  | YES                  | SIDE EFFECTS | CBZ   | OTHER | 47.00  |
|                | PS      | before | NO   | YES | UNCONTROLLED SEIZURE | PHT          | CBZ   | LTG   | 51.00  |
|                | PS      | before | NO   | YES | UNCONTROLLED SEIZURE | VPA          | CBZ   |       | 101.00 |
|                | GTC     | before | NO   | YES | SIDE EFFECTS         | PG           | OXC   |       | 138.00 |
|                | PS+SGTC | before | YES  | YES | SIDE EFFECTS         | PHT          | LEV   |       | 24.00  |
| WHOLE BRAIN RT | PS+SGTC | before | NO   | YES | SIDE EFFECTS         | VPA          | CBZ   |       | 104.00 |
|                |         |        | 0.00 | NO  |                      | OXC          |       |       | 63.00  |
| WHOLE BRAIN RT | PS+PC   | before | YES  | YES | UNCONTROLLED SEIZURE | LEV          | CBZ   | LCM   | 16.00  |
|                | PC+SGTC | before | NO   | NO  |                      | OXC          |       |       | 82.00  |
|                | PS      | before | NO   | NO  |                      | OXC          |       |       | 49.00  |
|                | PS      | before | NO   | NO  |                      | CBZ          |       |       | 51.00  |
| WHOLE BRAIN RT | PS      | before | YES  | YES | UNCONTROLLED SEIZURE | OXC          | LEV   | LCM   | 44.00  |
|                | PS      | before | NO   | YES | SIDE EFFECTS         | CBZ          | OXC   |       | 76.00  |
|                | PC+SGTC | before | NO   | YES | UNCONTROLLED SEIZURE | PG           | CBZ   |       | 159.00 |
|                | PC+SGTC | before | NO   | NO  |                      | OXC          |       |       | 63.00  |
|                | PC+SGTC | before | YES  | YES | UNCONTROLLED SEIZURE | VPA          | LCM   | LEV   | 26.00  |
|                | PC+SGTC | before | YES  | YES | UNCONTROLLED SEIZURE | PG           | CBZ   |       | 375.00 |
| WHOLE BRAIN RT | PS      | before | NO   | YES | SIDE EFFECTS         | VPA          | LEV   |       | 63.00  |
|                | PC+SGTC | before | NO   | YES | UNCONTROLLED SEIZURE | VPA          | LEV   |       | 42.00  |
|                | PS+SGTC | before | NO   | YES | UNCONTROLLED SEIZURE | OXC          | LEV   |       | 63.00  |
|                | GTC     | before | NO   | NO  |                      | OXC          |       |       | 48.00  |
|                | PS      | before | NO   | NO  |                      | OTHER        |       |       | 123.00 |
|                | PS      | before | YES  | YES | UNCONTROLLED SEIZURE | VPA          | CBZ   |       | 30.00  |
|                | PS      | before | YES  | YES | UNCONTROLLED SEIZURE | CBZ          | OTHER | LCM   | 243.00 |
|                | PS      | before | YES  | YES | UNCONTROLLED SEIZURE | OTHER        | OXC   | CBZ   | 108.00 |
|                | GTC     | after  | NO   | YES | UNCONTROLLED SEIZURE | LEV          | CBZ   |       | 16.00  |
|                | PS      | before | YES  | YES | SIDE EFFECTS         | LEV          | OXC   |       | 32.00  |
|                | PS      | before | NO   | NO  |                      | OXC          |       |       | 43.00  |
|                | PS      | before | YES  | YES | UNCONTROLLED SEIZURE | PG           | OXC   | LEV   | 159.00 |
|                | PS      | before | NO   | NO  |                      | CBZ          |       |       | 50.00  |
|                | PS+SGTC | before | NO   | NO  |                      | CBZ          |       |       | 94.00  |
|                | PC      | before | NO   | YES | UNCONTROLLED SEIZURE | PG           | OXC   | TPM   | 171.00 |
|                | PS+SGTC | before | YES  | YES | UNCONTROLLED SEIZURE | PG           | OXC   | CBZ   | 28.00  |
| WHOLE BRAIN RT | PS      | before | NO   | YES | UNCONTROLLED SEIZURE | OXC          | LCM   |       | 48.00  |
|                | PS      | before | NO   | YES | UNCONTROLLED SEIZURE | TPM          | CBZ   | LEV   | 77.00  |

|                    |               |              |      |     |                      |        |       |         |        |
|--------------------|---------------|--------------|------|-----|----------------------|--------|-------|---------|--------|
|                    | PS+SGTC       | before       | NO   | YES | SIDE EFFECTS         | VPA    | LEV   |         | 99.00  |
|                    | PS+SGTC       | before       | NO   | YES | UNCONTROLLED SEIZURE | VPA    | OTHER | OXC     | 95.00  |
|                    | PC            | before       | YES  | YES | UNCONTROLLED SEIZURE | OXC    | LEV   |         | 89.00  |
| WHOLE BRAIN RT     | PS+PC         | before       | NO   | YES | UNCONTROLLED SEIZURE | CBZ    | LEV   |         | 180.00 |
| WHOLE BRAIN RT     | PC+SGTC       | after        | NO   | NO  |                      | PG     |       |         | 9.00   |
| WHOLE BRAIN RT     | PS            | before       | YES  | YES | SIDE EFFECTS         | CBZ    | PHT   | PG      | 24.00  |
| WHOLE BRAIN RT     | PS            | before       | YES  | NO  |                      | PHT    | LEV   |         | 12.00  |
| WHOLE BRAIN RT     | PC            | before       | NO   | NO  |                      | PG     | VPA   |         | 5.00   |
| IMRT               | PS+SGTC       | before       | NO   | NO  |                      | PHT    |       |         | 2.00   |
| IMRT               | PS            | before       | NO   | NO  |                      | PHT    |       |         | 3.00   |
| WHOLE BRAIN RT     | PS+SGTC       | before       | NO   | NO  |                      | LTG    |       |         | 4.00   |
|                    | PS+SGTC       |              | 0.00 | NO  |                      | PG     |       |         | 0.00   |
|                    | PC            | before       | NO   | NO  |                      | OXC    |       |         | 9.00   |
| CONFORMATION AL RT | PS            | before       | YES  | YES | UNCONTROLLED SEIZURE | LEV    | PHT   |         | 8.00   |
| CONFORMATION AL RT | PC            | after        | YES  | NO  |                      | PG     | OXC   | LEV+TPM | 105.00 |
| CONFORMATION AL RT | PS+SGTC       | before       | YES  | NO  |                      | VPA    |       |         | 11.00  |
| CONFORMATION AL RT | PS            | before       | YES  | NO  |                      | OXC    |       |         | 7.00   |
| CONFORMATION AL RT | PC            | before       | NO   | NO  |                      | PG     |       |         | 32.00  |
| CONFORMATION AL RT | PC            | before       | NO   | NO  |                      | OXC    |       |         | 4.00   |
| CONFORMATION AL RT | PS+SGTC       | before       | YES  | NO  |                      | PHT    | OXC   |         | 6.00   |
| CONFORMATION AL RT | PC            | before       | NO   | NO  |                      | LEV    |       |         | 2.00   |
| IMRT               |               | before       | NO   | NO  |                      | LEV    |       |         | 4.00   |
| CONFORMATION AL RT | PS+PC+SGTC    | before       | NO   | NO  |                      | CBZ+PB |       |         | 96.00  |
| CONFORMATION AL RT | PC+SGTC       | before       | NO   | NO  |                      | OXC    |       |         | 57.00  |
| CONFORMATION AL RT |               | before       | NO   | NO  |                      | PG     |       |         | 36.00  |
| CONFORMATION AL RT | GTC           |              | 0.00 | NO  |                      | PHT    |       |         | 18.00  |
| CONFORMATION AL RT | GTC           | after        | NO   | NO  |                      | LEV    |       |         | 23.00  |
| CONFORMATION AL RT | CONVULSIVE PS |              | 0.00 | NO  |                      | CBZ    |       |         | 26.00  |
| CONFORMATION AL RT |               |              | 0.00 | NO  |                      | LEV    |       |         | 35.00  |
| CONFORMATION AL RT | PC+SGTC       | before       | NO   | NO  |                      | LEV    |       |         | 10.00  |
| CONFORMATION AL RT |               | before       | NO   | NO  |                      | CBZ    |       |         | 16.00  |
| CONFORMATION AL RT | PC            | before       | NO   | NO  |                      | LEV    |       |         | 29.00  |
| CONFORMATION AL RT | PC            | before       | YES  | YES | UNCONTROLLED SEIZURE | LEV    |       |         | 12.00  |
| IMRT               | PS            | after        | NO   | NO  |                      | PHT    |       |         | 34.00  |
| CONFORMATION AL RT | PS            | after        | YES  | NO  |                      | OXC    |       |         | 26.00  |
| CONFORMATION AL RT | GTC           | before       | NO   | NO  |                      | PG     |       |         | 45.00  |
| CONFORMATION AL RT | GTC           | before       | NO   | NO  |                      | CBZ    | LEV   |         | 13.00  |
|                    | PC+SGTC       | before       | NO   | NO  |                      | LEV    |       |         | 1.00   |
| CONFORMATION AL RT | PC+SGTC       | before+after | YES  | NO  |                      | LEV    |       |         | 28.00  |
| CONFORMATION AL RT | PC+SGTC       | before       | NO   | YES | SIDE EFFECTS         | PG     | LEV   |         | 33.00  |
| CONFORMATION AL RT | GTC           | before       | NO   | NO  |                      | LEV    |       |         | 28.00  |
| CONFORMATION AL RT | PS            | after        | NO   | NO  |                      | PHT    | TPM   | LEV     | 61.00  |

|                    |         |              |     |     |                      |         |         |     |       |
|--------------------|---------|--------------|-----|-----|----------------------|---------|---------|-----|-------|
| CONFORMATION AL RT | GTC     | before+after | NO  | NO  |                      | CBZ     |         |     | 6.00  |
| CONFORMATION AL RT | PS+SGTC | before+after | YES | YES | UNCONTROLLED SEIZURE | CBZ+PHT | 1000.00 |     | 21.00 |
| CONFORMATION AL RT | GTC     | after        | YES | NO  |                      | LEV     |         |     | 6.00  |
| CONFORMATION AL RT | PS      | before       | NO  | NO  |                      | OXC     |         |     | 10.00 |
| CONFORMATION AL RT | PC      | before       | YES | NO  |                      | LEV     | 1000.00 |     | 29.00 |
|                    | PC      | before       | NO  | NO  |                      | OXC+PB  | OXC     |     | 72.00 |
| CONFORMATION AL RT | PS      | before       | NO  | NO  |                      | PG      |         |     | 39.00 |
| STEREOTASSICA      | PS+SGTC | before       | YES | NO  |                      | CBZ     | OXC     | TPM | 93.00 |
| CONFORMATION AL RT | GTC     | before       | NO  | NO  |                      | LEV     |         |     | 29.00 |
| CONFORMATION AL RT | GTC     | before       | YES | NO  |                      | OXC     |         |     | 50.00 |
| CONFORMATION AL RT | PS      | after        | YES | NO  |                      | LEV     | 300.00  |     | 20.00 |
| CONFORMATION AL RT | GTC     | before       | YES | YES | UNCONTROLLED SEIZURE | PHT     | LEV     | VPA | 43.00 |
| STEREOTASSICA      | PC+SGTC | before       | NO  | NO  |                      | PG      |         |     | 74.00 |
| CONFORMATION AL RT | PC      | after        | NO  | NO  |                      | PG      |         |     | 59.00 |
| CONFORMATION AL RT | PS      | before       | NO  | NO  |                      | CBZ     |         |     | 65.00 |
| CONFORMATION AL RT | PC      | before       | NO  | NO  |                      | PG      |         |     | 51.00 |
|                    | PC      | before       | YES | NO  |                      | LEV     | CBZ     | VPA | 21.00 |
| CONFORMATION AL RT | PS      | before       | NO  | NO  |                      | LEV     |         |     | 25.00 |
| CONFORMATION AL RT |         | before       | NO  | NO  |                      | LEV     |         |     | 24.00 |
| CONFORMATION AL RT |         | before       | NO  | NO  |                      | PG      |         |     | 65.00 |
| CONFORMATION AL RT | GTC     | after        | NO  | NO  |                      | PG      |         |     | 48.00 |
| CONFORMATION AL RT | PS      | before       | NO  | NO  |                      | PHT     | OXC     |     | 87.00 |
| CONFORMATION AL RT | GTC     | before       | NO  | NO  |                      | PHT+PB  | PG      |     | 12.00 |
| CONFORMATION AL RT |         | before       |     | NO  |                      | CBZ     | LEV+CBZ |     | 74.00 |
| CONFORMATION AL RT | PS      | before       | YES | NO  |                      | OXC     |         |     | 7.00  |
| CONFORMATION AL RT |         | before       | YES | NO  |                      | PG      | OXC+PB  | CBZ | 67.00 |
| IMRT               |         | after        | NO  | NO  |                      | LEV     |         |     | 18.00 |
| CONFORMATION AL RT | GTC     | before       | NO  | NO  |                      | LEV     |         |     | 13.00 |
| CONFORMATION AL RT | PS      | before       | NO  | NO  |                      | CBZ     |         |     | 44.00 |
| CONFORMATION AL RT | PC      | before       | NO  | NO  |                      | CBZ     |         |     | 18.00 |
| CONFORMATION AL RT | PC+SGTC | before       | YES | NO  |                      | VPA     | LEV+VPA |     | 12.00 |
| CONFORMATION AL RT | GTC     | after        | NO  | NO  |                      | OXC     |         |     | 3.00  |
| CONFORMATION AL RT | PC      | before       | NO  | NO  |                      | LEV     |         |     | 37.00 |
| CONFORMATION AL RT | PS      | before       | NO  | NO  |                      | LEV     |         |     | 24.00 |
| CONFORMATION AL RT | PC+SGTC | before       | NO  | NO  |                      | OXC     |         |     | 58.00 |
| CONFORMATION AL RT | PC      | before       | NO  | NO  |                      | LEV     | 30.00   |     | 5.00  |
| CONFORMATION AL RT | PC      | before       | NO  | NO  |                      | LEV     |         |     | 14.00 |
| CONFORMATION AL RT | PS      | before       | NO  | NO  |                      | LEV     |         |     | 21.00 |
| CONFORMATION AL RT | PC      | before       | NO  | NO  |                      | LEV     |         |     | 5.00  |
| CONFORMATION AL RT | PC      | before       | NO  | NO  |                      | LEV     |         |     | 2.00  |
| CONFORMATION AL RT | PS+SGTC | before       | NO  | NO  |                      | LEV     |         |     | 9.00  |
| CONFORMATION AL RT | GTC     | before       | NO  | NO  | OTHER                | PG      |         |     | 66.00 |

|                    |               |        |          |     |                           |         |         |     |       |
|--------------------|---------------|--------|----------|-----|---------------------------|---------|---------|-----|-------|
| CONFORMATION AL RT | GTC           | after  | YES      | NO  |                           | LEV     |         |     | 3.00  |
| CONFORMATION AL RT | PC            | before | NO       | NO  |                           | LEV     |         |     | 4.00  |
| CONFORMATION AL RT | PS+SGTC       | before | NO       | NO  |                           | LEV     |         |     | 7.00  |
| WHOLE BRAIN RT     | PC            |        | 0.00 NO  | NO  |                           | LEV     |         |     | 13.00 |
|                    | GTC           | after  | YES      | NO  |                           | LEV     |         |     | 1.00  |
| CONFORMATION AL RT | GTC           | after  | YES      | YES | UNCONTROLLED SEIZURE      | LEV     | 30.00   |     | 4.00  |
| CONFORMATION AL RT | PS            | before | NO       | NO  |                           | LEV     |         |     | 5.00  |
| CONFORMATION AL RT | GTC           | before | YES      | NO  |                           | LEV     |         |     | 7.00  |
| CONFORMATION AL RT | GTC           | before | NO       | NO  |                           | LEV     |         |     | 6.00  |
| CONFORMATION AL RT | PS            | before | NO       | NO  |                           | LEV+PHT |         |     | 6.00  |
| CONFORMATION AL RT | GTC           | before | NO       | NO  |                           | LEV     |         |     | 7.00  |
| CONFORMATION AL RT | CONVULSIVE PS | before | YES      | YES | UNCONTROLLED SEIZURE      | LEV     |         |     | 2.00  |
| CONFORMATION AL RT | PC            | before | NO       | NO  |                           | LEV+OXC |         |     | 9.00  |
| CONFORMATION AL RT | PC            |        | 0.00 YES | NO  |                           | LEV     |         |     | 4.00  |
| CONFORMATION AL RT | GTC           | after  | YES      | YES | UNCONTROLLED SEIZURE      | PG      | LEV+VPA |     | 10.00 |
| CONFORMATION AL RT | PC+SGTC       | before | NO       | NO  |                           | LEV     |         |     | 9.00  |
| CONFORMATION AL RT | GTC           | before | YES      | YES | UNCONTROLLED SEIZURE      | LEV     | LCM+LEV |     | 8.00  |
| CONFORMATION AL RT | GTC           | before | NO       | NO  |                           | PG      |         |     | 14.00 |
| CONFORMATION AL RT | GTC           | before | NO       | NO  |                           | LEV+VPA |         |     | 4.00  |
|                    | GTC           | before | NO       | NO  |                           | LEV     |         |     | 1.00  |
| CONFORMATION AL RT | GTC           | before | NO       | NO  |                           | LEV     |         |     | 2.00  |
| CONFORMATION AL RT | GTC           | before | NO       | NO  |                           | LEV     |         |     | 5.00  |
| CONFORMATION AL RT | PC            | before | NO       | NO  |                           | LEV     |         |     | 4.00  |
| CONFORMATION AL RT | GTC           | before | NO       | NO  |                           | LEV     |         |     | 3.00  |
| CONFORMATION AL RT | PC            |        | 0.00 NO  | YES | UNCONTROLLED SEIZURE      | LTG     | PHT     | LEV | 6.00  |
|                    | GTC           |        | 0.00 NO  | NO  |                           | CBZ     |         |     | 3.00  |
| CONFORMATION AL RT | PC            |        | 0.00 YES | YES | UNCONTROLLED SEIZURE      | PHT     | OXC     |     | 17.00 |
| CONFORMATION AL RT | PC+SGTC       |        | 0.00 NO  | YES | UNCONTROLLED SEIZURE      |         | OXC     | LEV | 16.00 |
| CONFORMATION AL RT | PS+SGTC       |        | 0.00 NO  | NO  |                           | LEV     |         |     | 10.00 |
| CONFORMATION AL RT | GTC           |        | 0.00 NO  | YES | SCARCE COMPLIANCE         | PHT     |         |     | 15.00 |
|                    | GTC           |        | 0.00     | YES | UNCONTROLLED SEIZURE      | PG      | VPA     | CBZ |       |
| CONFORMATION AL RT | PS            |        | 0.00 YES | YES | SIDE EFFECTS              | CBZ     | OXC     |     | 17.00 |
|                    |               |        | 0.00 YES | YES | UNCONTROLLED SEIZURE      | PG      | LEV     |     | 12.00 |
| CONFORMATION AL RT | GTC           | after  | YES      | YES | SIDE EFFECTS+SCARCE COMPL | OXC     | LEV     |     | 20.00 |
| CONFORMATION AL RT | PS+SGTC       |        | 0.00 YES | YES | UNCONTROLLED SEIZURE      | OXC     |         |     | 6.00  |
|                    | PC+SGTC       | after  | NO       | YES |                           | PG      | OXC     |     | 6.00  |
| CONFORMATION AL RT | GTC           |        | 0.00 NO  | YES | SIDE EFFECTS              | CBZ     | VPA     | LEV | 23.00 |
| CONFORMATION AL RT | PC+SGTC       |        | 0.00 NO  | NO  |                           | VPA     |         |     |       |
| CONFORMATION AL RT | PC            |        | 0.00 NO  | NO  |                           | VPA     |         |     |       |
| CONFORMATION AL RT | PS            |        | 0.00 YES | YES | UNCONTROLLED SEIZURE      | LEV     |         |     |       |
| CONFORMATION AL RT | PS            |        | 0.00 YES | YES | UNCONTROLLED SEIZURE      | OXC     | TPM     | LTG | 21.00 |
| RADIOSURGERY       | PS            |        | 0.00 NO  | YES | UNCONTROLLED SEIZURE      | OXC     | PG      |     | 2.00  |

|                    |         |      |        |     |                      |       |     |       |       |
|--------------------|---------|------|--------|-----|----------------------|-------|-----|-------|-------|
| IMRT               | PS      | 0.00 | NO     | YES | UNCONTROLLED SEIZURE | OXC   | LEV |       |       |
| CONFORMATION AL RT | PC      | 0.00 |        | NO  |                      | VPA   |     |       |       |
| CONFORMATION AL RT | PC      | 0.00 | NO     | NO  |                      | VPA   |     |       | 6.00  |
| CONFORMATION AL RT | GTC     | 0.00 | NO     | NO  |                      | LEV   |     |       | 12.00 |
| CONFORMATION AL RT | PS      | 0.00 | NO     | YES | UNCONTROLLED SEIZURE | PG    | LEV | OTHER | 10.00 |
| CONFORMATION AL RT | GTC     | 0.00 |        | YES | UNCONTROLLED SEIZURE | OXC   | LEV |       |       |
| CONFORMATION AL RT | PS      | 0.00 | YES    | YES | UNCONTROLLED SEIZURE | LEV   |     |       | 4.00  |
| CONFORMATION AL RT | PC+SGTC | 0.00 |        | YES | UNCONTROLLED SEIZURE | LEV   | OXC |       |       |
| CONFORMATION AL RT | PS      | 0.00 |        | YES | SCARCE COMPLIANCE    | CBZ   | LEV |       |       |
| CONFORMATION AL RT | PC+SGTC | 0.00 | YES    | YES | UNCONTROLLED SEIZURE | TPM   | LEV |       | 5.00  |
|                    | PS      | 0.00 | YES    | NO  |                      | LEV   |     |       | 17.00 |
| CONFORMATION AL RT | PC      | 0.00 |        |     |                      | LEV   |     |       | 4.00  |
| IMRT               | PS+SGTC | 0.00 | NO     | YES | UNCONTROLLED SEIZURE | PG    | LEV |       | 3.00  |
| CONFORMATION AL RT | PC+SGTC | 0.00 |        | NO  |                      | LEV   |     |       |       |
| WHOLE BRAIN RT     | PS      | 0.00 |        | NO  |                      | VPA   |     |       | 15.00 |
| CONFORMATION AL RT | PS      | 0.00 | YES    | NO  |                      | VPA   |     |       | 4.00  |
| CONFORMATION AL RT | PS      | 0.00 | NO     | YES | SIDE EFFECTS         | CBZ   | LCM | OXC   | 1.00  |
| CONFORMATION AL RT | PS      | 0.00 | YES    | YES | UNCONTROLLED SEIZURE | LEV   | OXC |       | 8.00  |
| CONFORMATION AL RT | PS      | 0.00 |        | NO  |                      | LEV   |     |       |       |
|                    | GTC     | 0.00 | NO     | YES | UNCONTROLLED SEIZURE | CBZ   | LEV | TPM   | 20.00 |
| CONFORMATION AL RT | PC      | 0.00 | NO     | YES | UNCONTROLLED SEIZURE | LEV   |     |       | 5.00  |
|                    | GTC     | 0.00 | NO     | NO  |                      | CBZ   |     |       | 18.00 |
| CONFORMATION AL RT | PS      | 0.00 | NO     | NO  |                      | VPA   |     |       | 8.00  |
| CONFORMATION AL RT | PS      | 0.00 | NO     | NO  |                      | LEV   |     |       |       |
| CONFORMATION AL RT | GTC     | 0.00 | NO     | YES | UNCONTROLLED SEIZURE | CBZ   | LEV |       | 12.00 |
| CONFORMATION AL RT | PS      | 0.00 | NO     | NO  |                      | LEV   |     |       | 1.00  |
| CONFORMATION AL RT | PS+PC   | 0.00 | NO     | YES | UNCONTROLLED SEIZURE | LEV   | OXC |       | 12.00 |
| CONFORMATION AL RT | GTC     | 0.00 | NO     | NO  |                      | VPA   |     |       | 13.00 |
| CONFORMATION AL RT | PC      | 0.00 | NO     | YES | SIDE EFFECTS         | CBZ   | PG  |       |       |
| CONFORMATION AL RT | PS      | 0.00 | NO     | NO  |                      | LEV   |     |       | 17.00 |
|                    | PS+SGTC | 0.00 |        | YES | UNCONTROLLED SEIZURE | LEV   |     |       |       |
| CONFORMATION AL RT | PS      | 0.00 | NO     | NO  |                      | OXC   |     |       | 17.00 |
|                    | PS      | 0.00 |        | NO  |                      | PG    |     |       |       |
|                    | PC      | 0.00 | YES    | NO  |                      | TPM   |     |       | 15.00 |
| CONFORMATION AL RT | PC      | 0.00 | NO     | YES | SIDE EFFECTS         | PG    | LEV |       | 24.00 |
|                    | GTC     | 0.00 | NO     | YES | SIDE EFFECTS         | CBZ   | LEV |       | 13.00 |
| CONFORMATION AL RT | GTC     | 0.00 | NO     | NO  |                      | OXC   |     |       | 1.00  |
|                    | PS+SGTC |      | after  | YES | UNCONTROLLED SEIZURE | LEV   | PHT |       |       |
|                    | PS      |      | after  | NO  |                      | LEV   |     |       |       |
|                    | PS+SGTC | 0.00 | NO     | YES | UNCONTROLLED SEIZURE |       | LEV | TPM   | 23.00 |
| CONFORMATION AL RT | PS      |      | before | NO  |                      | OTHER |     |       | 10.00 |
|                    | GTC     |      | before | YES | UNCONTROLLED SEIZURE | CBZ   | LEV |       | 7.00  |

|                    |             |        |     |     |                      |       |     |     |        |
|--------------------|-------------|--------|-----|-----|----------------------|-------|-----|-----|--------|
|                    | PS          | after  |     | NO  |                      | LEV   |     |     | 3.00   |
|                    | GTC         | before | NO  | YES | SCARCE COMPLIANCE    | OTHER | PHT | VPA | 3.00   |
|                    |             | before |     | YES | SCARCE COMPLIANCE    | PHT   | PG  |     |        |
|                    |             | before | NO  | YES | SIDE EFFECTS         | PG    | LEV |     |        |
|                    | GTC         | before |     | YES | UNCONTROLLED SEIZURE | PG    | VPA | CBZ |        |
| RADIOSURGERY       | GTC         | before | YES | YES | UNCONTROLLED SEIZURE | VPA   | LTG | LEV | 14.00  |
| CONFORMATION AL RT | GTC         | before | NO  | YES |                      | PHT   |     |     | 5.00   |
| CONFORMATION AL RT | PS          | before | NO  | YES | UNCONTROLLED SEIZURE | CBZ   | TPM | LEV | 25.00  |
| RADIOSURGERY       | PS          | before | NO  | YES | UNCONTROLLED SEIZURE | LEV   | OXC |     | 28.00  |
| CONFORMATION AL RT |             | before | NO  | YES | UNCONTROLLED SEIZURE | CBZ   | LEV |     | 6.00   |
|                    | PS          | before | NO  | YES | UNCONTROLLED SEIZURE | VPA   | TPM |     | 5.00   |
|                    | GTC         | before | NO  | NO  |                      | VPA   | LEV |     |        |
| CONFORMATION AL RT | GTC         | before | NO  | NO  |                      | LEV   | PHT |     | 11.00  |
|                    | GTC         | before | NO  | NO  |                      | LEV   |     |     | 26.00  |
|                    | GTC         | before | NO  | NO  |                      | VPA   |     |     | 25.00  |
|                    | GTC         | before | NO  | NO  |                      | LEV   |     |     | 24.00  |
|                    | PS          | before | YES | NO  |                      | LEV   |     |     | 120.00 |
|                    | PS          | before | NO  | NO  |                      | CBZ   | PG  |     | 20.00  |
|                    | GTC         | before | NO  | NO  |                      | LEV   |     |     | 9.00   |
| CONFORMATION AL RT | GTC         | before | NO  | NO  |                      | LEV   |     |     | 12.00  |
|                    | PS+SGTC+GTC | before | YES | YES | UNCONTROLLED SEIZURE | LEV   | OXC |     | 85.00  |
|                    | GTC         | before | NO  | NO  |                      | LEV   |     |     | 18.00  |
|                    | PS+SGTC     | before | NO  | NO  |                      | LEV   |     |     | 19.00  |
|                    | PS          | before | NO  | NO  |                      | TPM   | PG  |     | 2.00   |
|                    | PS          | before | NO  | YES | SIDE EFFECTS         | PHT   | LEV |     | 15.00  |
|                    | PC+SGTC     | before | NO  | NO  |                      | LTG   |     |     | 22.00  |
|                    | GTC         | before | NO  | NO  |                      | LEV   |     |     | 6.00   |
|                    | PS          | after  | NO  | NO  |                      | LEV   | TPM |     | 1.00   |
|                    | PS          | after  | NO  | NO  |                      | LEV   |     |     | 8.00   |
| RADIOSURGERY       | PS          | before | NO  | NO  |                      | LEV   |     |     | 34.00  |
|                    | GTC         | before | NO  | NO  |                      | VPA   |     |     | 46.00  |
|                    | PS          | before | YES | NO  |                      | LEV   | OXC |     | 14.00  |
|                    | GTC         | before | NO  | NO  |                      | LEV   | PG  |     | 12.00  |
|                    | PC+SGTC     | before | NO  | NO  |                      | LEV   |     |     | 20.00  |
|                    | PS          | before | NO  | NO  |                      | OXC   |     |     | 5.00   |
|                    | GTC         | before | NO  | NO  |                      | PG    |     |     | 21.00  |
|                    | PS          | before | NO  | YES | UNCONTROLLED SEIZURE | CBZ   | LEV |     | 18.00  |
|                    | PS          | before | NO  | NO  |                      | LEV   |     |     | 26.00  |
|                    | PS          | before | NO  | NO  |                      | LEV   |     |     | 11.00  |
| CONFORMATION AL RT | PS          | before | NO  | NO  |                      | CBZ   |     |     |        |
|                    | PS          | before | NO  | NO  |                      | LEV   |     |     | 14.00  |
|                    | PS+SGTC     | before |     | NO  |                      | OXC   |     |     |        |



|                    |             |              |     |     |                      |     |     |     |        |
|--------------------|-------------|--------------|-----|-----|----------------------|-----|-----|-----|--------|
|                    | PS+SGTC+GTC | before+after | YES | NO  |                      | LEV |     |     | 20.00  |
| CONFORMATION AL RT | GTC         | before       | NO  | NO  |                      | PG  | TPM |     | 26.00  |
| CONFORMATION AL RT | PS          | before       | NO  | YES | UNCONTROLLED SEIZURE | PHT | LEV |     | 33.00  |
| CONFORMATION AL RT | PC+SGTC     | after        | NO  | NO  |                      | LEV |     |     | 10.00  |
| WHOLE BRAIN RT     | PS          | before       | NO  | NO  |                      | LEV |     |     | 17.00  |
|                    | PC          | before       | NO  | YES | UNCONTROLLED SEIZURE | VPA | TPM | LEV | 139.00 |
| CONFORMATION AL RT | PS+SGTC     | before       | NO  | YES | UNCONTROLLED SEIZURE | TPM | VPA |     | 20.00  |
|                    | PS          | before       | NO  | YES | SCARCE COMPLIANCE    | PG  | OXC |     | 84.00  |
| CONFORMATION AL RT | PC          | before       | NO  | YES | UNCONTROLLED SEIZURE | LEV | LCM |     | 17.00  |
|                    | GTC         | before       | NO  | NO  |                      | VPA |     |     | 7.00   |
| CONFORMATION AL RT | PC          | before       | NO  | NO  |                      | LEV |     |     | 23.00  |
|                    | PS+SGTC     | before       | NO  | NO  |                      | LEV |     |     | 5.00   |
| CONFORMATION AL RT | PC          | before       | NO  | NO  |                      | LEV |     |     | 96.00  |
|                    | PC          | before       | NO  | NO  |                      | LEV | LCM |     | 36.00  |
| CONFORMATION AL RT | PC          | after        | NO  | NO  |                      | LEV |     |     | 2.00   |
| CONFORMATION AL RT | PS          | before       | NO  | YES | SIDE EFFECTS         | PG  | LEV |     | 7.00   |
| CONFORMATION AL RT | PS          | after        | NO  | NO  |                      | LEV |     |     | 2.00   |
| CONFORMATION AL RT | GTC         | before       | NO  | YES | UNCONTROLLED SEIZURE | LEV | OXC |     | 96.00  |
|                    | PC          | before       | NO  | NO  |                      | LEV |     |     | 4.00   |
| CONFORMATION AL RT | GTC         | after        | NO  | NO  |                      | OXC |     |     | 20.00  |
| CONFORMATION AL RT | PS          | before       | NO  | NO  |                      | LEV |     |     | 8.00   |
| CONFORMATION AL RT | GTC         | before       | NO  | NO  |                      | OXC |     |     | 11.00  |
|                    | PS          | before       | NO  | YES | UNCONTROLLED SEIZURE | PGB | LEV |     | 30.00  |
|                    | PS          | before       | NO  | NO  |                      | CBZ |     |     | 72.00  |
| CONFORMATION AL RT | GTC         | after        | NO  | NO  |                      | LEV | VPA | LEV | 7.00   |
| CONFORMATION AL RT | PS          | after        | NO  | NO  |                      | LEV |     |     | 5.00   |
|                    | GTC         | before       | NO  | NO  |                      | LEV |     |     | 20.00  |
|                    | PS          | before       | NO  | YES | UNCONTROLLED SEIZURE | PHT | LEV |     | 4.00   |
|                    | GTC         | before       | NO  | NO  |                      | LEV |     |     | 4.00   |
| CONFORMATION AL RT | GTC         | before       | NO  | NO  |                      | LEV |     |     | 21.00  |
|                    | PS          | before       | YES | NO  |                      | LEV |     |     | 25.00  |
| CONFORMATION AL RT | PC          | before       | NO  | NO  |                      | LEV |     |     | 7.00   |
| CONFORMATION AL RT | PS          | after        | NO  | NO  |                      | LEV |     |     | 13.00  |
|                    | PC          | before       | NO  | YES | UNCONTROLLED SEIZURE | CBZ | LEV |     | 12.00  |
| CONFORMATION AL RT | GTC         | before       | NO  | YES | UNCONTROLLED SEIZURE | LEV | PHT |     | 19.00  |
| CONFORMATION AL RT | GTC         | before       | NO  | YES | UNCONTROLLED SEIZURE | LEV | VPA | PHT | 15.00  |
| CONFORMATION AL RT | GTC         | before       | NO  | NO  |                      | LEV |     |     | 4.00   |
|                    | GTC         | before       | NO  | NO  |                      | LEV |     |     | 7.00   |
| CONFORMATION AL RT | GTC         | before       | NO  | NO  |                      | LEV |     |     | 19.00  |
| CONFORMATION AL RT | PS          | after        | NO  | NO  |                      | LEV |     |     | 13.00  |
| CONFORMATION AL RT | PS          | before       | NO  | NO  |                      | LEV |     |     | 36.00  |
| CONFORMATION AL RT | GTC         | before       | NO  | NO  |                      | LEV |     |     | 13.00  |

|                    |         |        |      |     |                      |                           |     |     |        |       |
|--------------------|---------|--------|------|-----|----------------------|---------------------------|-----|-----|--------|-------|
|                    | GTC     | before | NO   | NO  |                      | LEV                       |     |     | 4.00   |       |
| CONFORMATION AL RT | GTC     | before | NO   | NO  |                      | PG                        |     |     | 14.00  |       |
|                    | PS      | before | NO   | NO  |                      | LEV                       |     |     | 3.00   |       |
|                    | PC      | before | NO   | NO  |                      | LEV                       |     |     | 17.00  |       |
|                    | PS      | before | NO   | NO  |                      | CBZ                       |     |     | 2.00   |       |
| RADIOSURGERY       | GTC     | before | NO   | NO  |                      | LEV                       |     |     | 15.00  |       |
| WHOLE BRAIN RT     | PS      | before | NO   | YES | UNCONTROLLED SEIZURE | PG                        | OXC | LEV | 120.00 |       |
|                    | GTC     | before | NO   | NO  |                      | LEV                       |     |     | 15.00  |       |
|                    | GTC     | before | NO   | NO  |                      | LEV                       |     |     | 1.00   |       |
|                    | PS      | before | NO   | NO  |                      | CBZ                       |     |     | 10.00  |       |
|                    | PC      | before | NO   | NO  |                      | LEV                       |     |     | 15.00  |       |
|                    | GTC     | after  | NO   | NO  |                      | LEV                       |     |     | 1.00   |       |
| CONFORMATION AL RT | PC      | before | NO   | YES | UNCONTROLLED SEIZURE | CBZ                       | VPA |     | 17.00  |       |
|                    | PC      | before | NO   | NO  |                      | VPA                       |     |     | 7.00   |       |
| CONFORMATION AL RT |         | before | NO   | NO  |                      | LEV                       |     |     | 2.00   |       |
|                    | GTC     | before | NO   | NO  |                      | LEV                       |     |     | 16.00  |       |
|                    | GTC     | before | YES  | NO  |                      | LEV                       |     |     | 15.00  |       |
| CONFORMATION AL RT | PS      | before | NO   | NO  |                      |                           |     |     | 15.00  |       |
|                    | PC      | before | NO   | NO  |                      | CBZ                       |     |     | 6.00   |       |
| CONFORMATION AL RT | PC      | before | NO   | NO  |                      | LEV                       |     |     | 18.00  |       |
| CONFORMATION AL RT | PS      | before | NO   | NO  |                      | LEV                       |     |     | 8.00   |       |
| CONFORMATION AL RT | PS      | before | NO   | YES | UNCONTROLLED SEIZURE | VPA                       | LEV |     | 2.00   |       |
| CONFORMATION AL RT | GTC     | before | NO   | NO  |                      | OXC                       |     |     | 45.00  |       |
| CONFORMATION AL RT | PC      | before | NO   | NO  |                      | LEV                       |     |     | 14.00  |       |
| CONFORMATION AL RT | PS      | before | NO   | NO  |                      | LEV                       |     |     | 19.00  |       |
|                    | PS      | after  | NO   | YES | SCARCE COMPLIANCE    | PHT                       | LEV |     | 1.00   |       |
|                    | GTC     | before | NO   | NO  |                      | OXC                       |     |     | 25.00  |       |
| CONFORMATION AL RT | PS+SGTC | before | NO   | NO  |                      | LEV                       |     |     | 16.00  |       |
| CONFORMATION AL RT | PS      | before | NO   | NO  |                      | LEV                       |     |     | 6.00   |       |
|                    | PS      | before | NO   | YES | UNCONTROLLED SEIZURE | LEV                       | PHT |     | 4.00   |       |
| RADIOSURGERY       | GTC     | before | NO   |     |                      |                           |     |     | 14.00  |       |
| CONFORMATION AL RT | PS      | after  | NO   | YES | UNCONTROLLED SEIZURE | LEV                       | VPA |     | 1.00   |       |
| CONFORMATION AL RT | PS      | before | NO   | NO  |                      | LEV                       |     |     | 98.00  |       |
| CONFORMATION AL RT | GTC     | before | NO   | NO  |                      | PHT                       | LEV | VPA | 194.00 |       |
| CONFORMATION AL RT | GTC     | before | NO   | YES | SIDE EFFECTS         | VPA                       | LEV |     | 12.00  |       |
| CONFORMATION AL RT | PS      | before | NO   | YES | SIDE EFFECTS         | VPA                       | LEV |     | 33.00  |       |
|                    | GTC     | before | NO   | NO  |                      | LEV                       |     |     | 2.00   |       |
| RADIOSURGERY       | PS      | before | NO   | NO  |                      | LEV                       |     |     | 11.00  |       |
| CONFORMATION AL RT | PS+SGTC |        | 0.00 | YES | YES                  | SIDE EFFECTS+UNCONTROLLEI | VPA | LEV | PHT    | 2.00  |
| CONFORMATION AL RT | PS      |        | 0.00 | NO  | NO                   |                           | LEV |     |        | 13.00 |
|                    | GTC     |        | 0.00 |     | NO                   |                           | PG  |     |        |       |
| CONFORMATION AL RT | PS+SGTC | after  | YES  | YES | UNCONTROLLED SEIZURE | LEV                       |     |     | 3.00   |       |

|                    |         |              |      |     |     |                           |       |       |     |       |
|--------------------|---------|--------------|------|-----|-----|---------------------------|-------|-------|-----|-------|
| CONFORMATION AL RT | PC      |              | 0.00 |     | NO  |                           | LEV   |       |     | 12.00 |
| CONFORMATION AL RT |         |              | 0.00 | NO  | NO  |                           | LEV   |       |     | 11.00 |
| CONFORMATION AL RT | GTC     |              | 0.00 | NO  | YES | UNCONTROLLED SEIZURE      | LEV   |       |     | 13.00 |
|                    | PC      | after        |      | NO  | YES | UNCONTROLLED SEIZURE      | OTHER | PHT   |     | 1.00  |
|                    | GTC     |              | 0.00 |     | NO  |                           | LEV   |       |     |       |
| CONFORMATION AL RT | GTC     |              | 0.00 | NO  | YES | UNCONTROLLED SEIZURE      | PG    | LEV   |     | 8.00  |
|                    | PS      |              | 0.00 |     | NO  |                           | LEV   |       |     |       |
| CONFORMATION AL RT | GTC     |              | 0.00 | NO  | YES | UNCONTROLLED SEIZURE      | LEV   | OTHER |     | 4.00  |
| CONFORMATION AL RT | PS      | before       |      | NO  | YES | UNCONTROLLED SEIZURE      | TPM   |       |     | 3.00  |
|                    | PS+SGTC | before+after |      | NO  | YES | UNCONTROLLED SEIZURE      | LEV   | VPA   |     | 4.00  |
| CONFORMATION AL RT |         |              | 0.00 | NO  | YES | SIDE EFFECTS              | LEV   |       |     | 19.00 |
| CONFORMATION AL RT | PS      |              | 0.00 | NO  | YES | SIDE EFFECTS              | LEV   | OXC   | VPA | 10.00 |
|                    | PS+SGTC |              | 0.00 |     | NO  |                           | LEV   |       |     |       |
| CONFORMATION AL RT | PC      |              | 0.00 | NO  | NO  |                           |       |       |     | 20.00 |
| CONFORMATION AL RT | GTC     |              | 0.00 | NO  | NO  |                           | LEV   |       |     | 3.00  |
| STEREOTASSICA      | PS      |              | 0.00 |     | NO  |                           |       |       |     |       |
|                    | PC      |              | 0.00 | NO  | NO  |                           |       | PHT   |     | 2.00  |
| CONFORMATION AL RT | PC      |              | 0.00 | YES | YES | UNCONTROLLED SEIZURE      | LEV   | VPA   |     | 4.00  |
| CONFORMATION AL RT | PS      |              | 0.00 | NO  | NO  |                           | LEV   |       |     | 7.00  |
| CONFORMATION AL RT | PS+SGTC |              | 0.00 | NO  | NO  |                           | LEV   |       |     | 18.00 |
| CONFORMATION AL RT | PS      | after        |      | NO  | YES | UNCONTROLLED SEIZURE      | LEV   |       |     | 11.00 |
| CONFORMATION AL RT | PC      |              | 0.00 | YES | YES | SIDE EFFECTS+UNCONTROLLED | CBZ   | LEV   | TPM | 21.00 |
| CONFORMATION AL RT | PS      |              | 0.00 | NO  | NO  |                           | LEV   |       |     | 3.00  |
| CONFORMATION AL RT | PS      |              | 0.00 | NO  | YES | SIDE EFFECTS              | CBZ   | LEV   | TPM | 19.00 |
|                    | PS      |              | 0.00 |     | NO  |                           | LEV   |       |     |       |
| CONFORMATION AL RT | PS+SGTC |              | 0.00 | YES | YES | UNCONTROLLED SEIZURE      | OXC   | OTHER | LEV | 22.00 |
| CONFORMATION AL RT | GTC     |              | 0.00 | NO  | NO  |                           | LEV   |       |     | 15.00 |
| CONFORMATION AL RT | PC      |              | 0.00 | NO  | NO  |                           | LEV   |       |     | 20.00 |
| CONFORMATION AL RT | PC      |              | 0.00 | NO  | NO  |                           |       |       |     | 23.00 |
| CONFORMATION AL RT | GTC     |              | 0.00 | NO  | YES | SCARCE COMPLIANCE         | VPA   | OXC   | LEV | 22.00 |
| CONFORMATION AL RT | PS      |              | 0.00 | YES | YES | SIDE EFFECTS              | PHT   | LEV   |     | 13.00 |
|                    | PS+SGTC |              | 0.00 |     | YES | UNCONTROLLED SEIZURE      | LEV   |       |     |       |
|                    | PC      | after        |      |     | YES | UNCONTROLLED SEIZURE      | LEV   |       |     |       |
|                    | PS      |              | 0.00 | NO  | NO  |                           | LEV   |       |     | 17.00 |
| CONFORMATION AL RT | PC      |              | 0.00 | NO  | NO  |                           | LEV   |       |     | 16.00 |
| CONFORMATION AL RT | PS      |              | 0.00 | YES | YES | UNCONTROLLED SEIZURE      | LEV   |       |     | 13.00 |
|                    | PS      |              | 0.00 |     | NO  |                           | LEV   |       |     |       |
|                    |         |              | 0.00 | NO  | NO  |                           | LEV   |       |     |       |
|                    | PC+SGTC | after        |      | YES |     |                           | VPA   | LEV   |     | 4.00  |
| WHOLE BRAIN RT     | PS+SGTC | before       |      | YES |     |                           | OXC   | LEV   | LCM | 12.00 |
|                    | GTC     | before       |      | NO  |     |                           | OXC   |       |     | 24.00 |
| CONFORMATION AL RT | GTC     | before       |      | NO  |     |                           | PG    |       |     | 15.00 |

|                    |         |        |     |     |     |       |
|--------------------|---------|--------|-----|-----|-----|-------|
| CONFIRMATION AL RT | GTC     | before | NO  | OXC |     | 13.00 |
| WHOLE BRAIN RT     | PS      | before | YES | LEV | CBZ | 6.00  |
| CONFIRMATION AL RT | PS      | before | YES | VPA |     | 9.00  |
| CONFIRMATION AL RT | PS      | after  | NO  | LEV |     | 12.00 |
| CONFIRMATION AL RT | GTC     | before | NO  | OXC |     | 18.00 |
|                    | PC      | before | NO  | LEV |     | 17.00 |
|                    | PC      | before | YES | VPA |     | 17.00 |
| WHOLE BRAIN RT     | PS      | after  | YES | LEV |     | 9.00  |
| CONFIRMATION AL RT | PC      | before | NO  | LEV |     | 13.00 |
| CONFIRMATION AL RT | PC+SGTC | before | YES | LEV |     | 8.00  |
| CONFIRMATION AL RT | PC      | after  | YES | OXC |     | 9.00  |
| CONFIRMATION AL RT | GTC     | after  | YES | LEV |     | 9.00  |
| CONFIRMATION AL RT | PS      | before | NO  | VPA |     | 7.00  |

| time_mod_aed | proximity | mod_aed     | mod_1_aed                         | first_aed |
|--------------|-----------|-------------|-----------------------------------|-----------|
| 0.93         |           | 1.00 change |                                   | OXC       |
| -10.10       |           | 1.00 change | SIDE EFFECTS+UNCONTROLLED SEIZURE | PHT       |
| 36.53        |           | 1.00 no     |                                   | 0.00 LEV  |
| 2.03         |           | 1.00 change | SIDE EFFECTS                      | CBZ       |
| 1.03         |           | 1.00 change | UNCONTROLLED SEIZURE              | OXC       |
| 33.47        |           | 1.00 no     |                                   | 0.00 LEV  |
| 40.57        |           | 1.00 no     |                                   | 0.00 LEV  |
| 34.47        |           | 1.00 no     |                                   | 0.00 OXC  |
| 3.07         |           | 1.00 change | SIDE EFFECTS                      | PG        |
| 26.43        |           | 1.00 no     |                                   | 0.00 LEV  |
|              |           | change      |                                   | LEV       |
| 4.00         |           | 1.00 add_on | UNCONTROLLED SEIZURE              | OXC       |
| 34.57        |           | no          |                                   | 0.00 LEV  |
| 2.03         |           | change      | SIDE EFFECTS                      | OXC       |
| 29.37        |           | no          |                                   | 0.00 LEV  |
| 50.73        |           | no          |                                   | 0.00 OXC  |
| 2.03         |           | change      | SIDE EFFECTS                      | PHT       |
| 33.47        |           | no          |                                   | 0.00 LEV  |
| 3.03         |           | 1.00 add_on | UNCONTROLLED SEIZURE              | OXC       |
| 1.00         |           | 1.00 change | UNCONTROLLED SEIZURE              | PG        |
| 2.03         |           | change      | SIDE EFFECTS                      | CBZ       |
| 24.37        |           | no          |                                   | 0.00 OXC  |
| 2.03         |           | add_on      | UNCONTROLLED SEIZURE              | CBZ       |
| 13.20        |           | no          |                                   | 0.00 LEV  |
| 33.57        |           | no          |                                   | 0.00 OXC  |
| 14.20        |           | 1.00 no     |                                   | 0.00 CBZ  |
| 31.53        |           | no          |                                   | 0.00 LEV  |
| 19.27        |           | no          |                                   | 0.00 OXC  |
| 1.00         |           | change      | UNCONTROLLED SEIZURE              | PHT       |
| 21.33        |           | no          |                                   | 0.00 LEV  |
|              |           | 1.00 change | SIDE EFFECTS+UNCONTROLLED SEIZURE | CBZ       |
| 19.27        |           | no          |                                   | 0.00 OXC  |
| 38.50        |           | no          |                                   | 0.00 OXC  |
| 20.27        |           | no          |                                   | 0.00 OXC  |
| 2.03         |           | change      | SIDE EFFECTS                      | PHT       |
| 25.37        |           | no          |                                   | 0.00 CBZ  |
| 36.53        |           | no          |                                   | 0.00 PG   |
| 2.03         |           | change      | SIDE EFFECTS                      | PG        |
| 2.03         |           | 1.00 change | UNCONTROLLED SEIZURE              | PG        |

|        |             |                      |          |
|--------|-------------|----------------------|----------|
| 3.07   | 1.00 change | UNCONTROLLED SEIZURE | VPA      |
| 2.03   | 1.00 change | UNCONTROLLED SEIZURE | PG       |
| 11.17  | 1.00 add_on | UNCONTROLLED SEIZURE | CBZ      |
| 1.47   | 1.00 change | UNCONTROLLED SEIZURE |          |
| 11.17  | 1.00 add_on | UNCONTROLLED SEIZURE |          |
|        | 1.00        |                      | OXC      |
| 4.07   | 1.00 change | SIDE EFFECTS         | PG       |
|        | 1.00        |                      | OXC      |
|        | 1.00        |                      |          |
|        | 1.00        |                      | CBZ      |
|        | 1.00        |                      |          |
| 12.63  | 1.00 change | UNCONTROLLED SEIZURE | CBZ      |
| 1.00   | 2.00 change | SIDE EFFECTS         | LEV      |
| 44.63  | 2.00 add_on | UNCONTROLLED SEIZURE | PG       |
| 42.57  | 2.00 no     |                      | 0.00 VPA |
| 0.00   | 2.00 change | UNCONTROLLED SEIZURE | VPA      |
| 80.40  | 2.00 no     |                      | 0.00 VPA |
| 38.63  | 2.00 no     |                      | 0.00 VPA |
| 1.03   | 2.00 change | UNCONTROLLED SEIZURE | VPA      |
| 0.00   | 2.00 add_on | UNCONTROLLED SEIZURE | VPA      |
| 55.77  | 1.00 change | SE+OTHER             | PHT      |
| 176.03 | 1.00 add_on | OTHER                | PG       |
| 13.77  | 1.00 no     |                      | 0.00 OXC |
| 1.67   | 1.00 change | OTHER                | VPA      |
| 31.00  | 1.00 change | OTHER                |          |
| 31.80  | 1.00 no     |                      | 0.00 LEV |
| 35.67  | 1.00 no     |                      | 0.00 LEV |
| 15.27  | 1.00 add_on | UNCONTROLLED SEIZURE | LEV      |
| 29.23  | 1.00 no     |                      | 0.00 LEV |
| 26.83  | 1.00 no     |                      | 0.00 LEV |
| 6.57   | 1.00 change | OTHER                | OXC      |
| 0.47   | 1.00 change | OTHER                | PG       |
| 1.13   | 1.00 change | OTHER                | LEV      |
| 3.20   | 1.00 no     |                      | 0.00 LEV |
| 18.20  | 1.00 no     |                      | 0.00 LEV |
| 5.00   | 1.00 no     |                      | 0.00 LEV |
| 5.10   | 1.00 change | OTHER                | PHT      |
|        | 1.00        |                      |          |
| 11.13  | 1.00 change | OTHER                | CBZ      |
|        | 1.00        |                      |          |
|        | 1.00        |                      |          |
| 17.07  | 1.00 add_on | UNCONTROLLED SEIZURE | LEV      |

|        |             |                      |          |
|--------|-------------|----------------------|----------|
|        | 1.00        |                      |          |
|        | 1.00        |                      |          |
| 20.13  | 1.00 add_on | UNCONTROLLED SEIZURE | LEV      |
| 15.37  | 1.00 add_on | UNCONTROLLED SEIZURE | LEV      |
| 27.20  | 1.00 add_on | UNCONTROLLED SEIZURE | LEV      |
| 13.27  | 1.00 add_on | UNCONTROLLED SEIZURE | LEV      |
| -0.97  | 1.00 change | SIDE EFFECTS         | LEV      |
|        | 1.00        |                      | VPA      |
|        | 1.00        |                      |          |
| 20.23  | 1.00 change | OTHER                | PG       |
| 21.27  | 1.00 add_on | UNCONTROLLED SEIZURE | LEV      |
| 14.37  | 1.00 add_on | UNCONTROLLED SEIZURE | LEV      |
| 4.17   | 1.00 add_on | UNCONTROLLED SEIZURE | VPA      |
| 19.17  | 1.00 add_on | UNCONTROLLED SEIZURE | LEV      |
| 5.80   | 1.00 no     |                      | 0.00 CBZ |
| 10.97  | 1.00 no     |                      | 0.00 LEV |
|        | 1.00        |                      |          |
| 9.10   | 1.00 no     |                      | 0.00 OXC |
| 36.53  | 1.00 change | UNCONTROLLED SEIZURE | PG       |
| 129.53 | 1.00 no     |                      | 0.00 CBZ |
| 14.40  | 1.00 no     |                      | 0.00 CBZ |
| 72.60  | 1.00 change | UNCONTROLLED SEIZURE | PG       |
| 13.20  | 1.00 no     |                      | 0.00 OXC |
| 1.00   | 1.00 change | UNCONTROLLED SEIZURE | PHT      |
| 6.23   | 1.00 no     |                      | 0.00 LEV |
| 19.43  | 1.00 change | OTHER                | LEV      |
| 1.77   | 1.00 add_on | UNCONTROLLED SEIZURE | PHT      |
| 6.67   | 1.00 add_on | UNCONTROLLED SEIZURE | CBZ      |
| 24.37  | 2.00 add_on | UNCONTROLLED SEIZURE | LEV      |
| 0.00   | 2.00 change | SIDE EFFECTS         | CBZ      |
| 11.70  | 2.00 no     |                      | 0.00 PG  |
| 12.20  | 2.00 no     |                      | 0.00 LEV |
| 12.20  | 2.00 no     |                      | 0.00 LEV |
| 11.70  | 2.00 change | UNCONTROLLED SEIZURE | TPM      |
| 11.70  | 2.00 change | UNCONTROLLED SEIZURE | PG       |
| 0.00   | 2.00 add_on | UNCONTROLLED SEIZURE | CBZ      |
| 0.00   | 2.00 add_on | UNCONTROLLED SEIZURE | PG       |
| 0.00   | 2.00 change | SIDE EFFECTS         | PG       |
| 11.70  | 2.00 change | UNCONTROLLED SEIZURE | CBZ      |
| 1.13   | 1.00 change | SIDE EFFECTS         | OXC      |
| 8.87   | 1.00 add_on | UNCONTROLLED SEIZURE | PG       |
| 8.53   | 1.00 add_on | UNCONTROLLED SEIZURE | PG       |

|        |             |                      |          |
|--------|-------------|----------------------|----------|
| 5.63   | 1.00 add_on | SIDE EFFECTS         | PG       |
| 1.57   | 1.00 change | SIDE EFFECTS         | PG       |
| 1.13   | 1.00 no     |                      | 0.00 OXC |
| 8.17   | 1.00 change | UNCONTROLLED SEIZURE | LEV      |
| 0.27   | 1.00 no     |                      | 0.00 OXC |
| 51.33  | 1.00 no     |                      | 0.00 LEV |
| 1.13   | 1.00 add_on | UNCONTROLLED SEIZURE | PG       |
| 63.87  | 1.00 change | SCARCE COMPLIANCE    | LEV      |
| 0.90   | 1.00 no     |                      | 0.00 OXC |
| 13.63  | 1.00 no     |                      | 0.00 PG  |
| 6.10   | 1.00 no     |                      | 0.00     |
| -1.13  | 1.00 change | SIDE EFFECTS         | OXC      |
| 8.13   | 1.00 no     |                      | 0.00 OXC |
| 0.00   | 1.00 no     |                      | 0.00 OXC |
| 6.73   | 1.00 add_on | UNCONTROLLED SEIZURE | OXC      |
| 5.70   | 1.00 change | SIDE EFFECTS         | PG       |
| 0.23   | 1.00 change | SIDE EFFECTS         | CBZ      |
| 17.47  | 1.00 change | UNCONTROLLED SEIZURE | OXC      |
| -0.10  | 1.00 add_on | UNCONTROLLED SEIZURE | OXC      |
| 4.40   | 1.00 change | SCARCE COMPLIANCE    | OXC      |
| 15.80  | 1.00 change | UNCONTROLLED SEIZURE | OXC      |
| 15.67  | 1.00 add_on | UNCONTROLLED SEIZURE | OXC      |
| 73.03  | 1.00 change | UNCONTROLLED SEIZURE | OXC      |
| 10.90  | 1.00 add_on | UNCONTROLLED SEIZURE | VPA      |
| 239.10 | 1.00 add_on | UNCONTROLLED SEIZURE | PG       |
| 41.53  | 1.00 no     |                      | 0.00 OXC |
| 15.67  | 1.00 add_on | UNCONTROLLED SEIZURE | LEV      |
| 68.57  | 1.00 add_on | SCARCE COMPLIANCE    | LEV      |
| 1.53   | 1.00 change | SIDE EFFECTS         | LEV      |
| 17.20  | 1.00 add_on | UNCONTROLLED SEIZURE | PG       |
| 2.87   | 1.00 no     |                      | 0.00 LEV |
| 2.33   | 1.00 change | SIDE EFFECTS         | PG       |
| 3.37   | 1.00 change | SIDE EFFECTS         | CBZ      |
| 0.17   | 1.00 add_on | UNCONTROLLED SEIZURE | PG       |
| 0.00   | 1.00 no     |                      | 0.00 LEV |
| 18.53  | 1.00 add_on | UNCONTROLLED SEIZURE | OXC      |
| 30.37  | 1.00 add_on | UNCONTROLLED SEIZURE | PG       |
| 0.00   | 1.00 change | SIDE EFFECTS         | OXC      |
| 6.60   | 1.00 add_on | UNCONTROLLED SEIZURE | PG       |
| 0.00   | 1.00 change | SIDE EFFECTS         | LEV      |
| 96.50  | 1.00 change | SCARCE COMPLIANCE    | CBZ      |
| 210.10 | 1.00 no     |                      | 0.00 CBZ |



|       |             |                      |          |
|-------|-------------|----------------------|----------|
| 6.47  | 1.00 add_on | SIDE EFFECTS         | CBZ      |
| 14.00 | 1.00 add_on | SIDE EFFECTS         | OXC      |
| 8.17  | 1.00 no     |                      | 0.00 OXC |
| 3.47  | 1.00 change | SIDE EFFECTS         | PG       |
| 13.13 | 1.00 no     |                      | 0.00 LEV |
| 1.87  | 1.00 change | UNCONTROLLED SEIZURE | OXC      |
| 42.70 | 1.00 change | UNCONTROLLED SEIZURE | TPM      |
| 0.00  | 1.00 add_on | UNCONTROLLED SEIZURE | PG       |
| -2.03 | 1.00 change | SIDE EFFECTS         | PG       |
| 7.70  | 1.00 no     |                      | 0.00 LEV |
| 81.07 | 1.00 change | SIDE EFFECTS         | OXC      |
| 5.83  | 1.00 no     |                      | 0.00 LEV |
| 11.90 | 1.00 change | UNCONTROLLED SEIZURE | PG       |
| 0.50  | 1.00 no     |                      | 0.00 LEV |
| 0.13  | 1.00 add_on | UNCONTROLLED SEIZURE | PHT      |
| 31.90 | 1.00 add_on | UNCONTROLLED SEIZURE | PG       |
| 0.03  | 1.00 add_on | UNCONTROLLED SEIZURE | PG       |
| 8.60  | 1.00 add_on | UNCONTROLLED SEIZURE | LEV      |
| 0.37  | 1.00 no     |                      | 0.00 TPM |
| 1.03  | 1.00 add_on | UNCONTROLLED SEIZURE | PHT      |
| 0.20  | 1.00 no     |                      | 0.00 LEV |
| 3.53  | 1.00 no     |                      | 0.00 CBZ |
| 4.07  | change      | UNCONTROLLED SEIZURE | TPM      |
| 36.03 | 1.00 add_on | UNCONTROLLED SEIZURE | VPA      |
| 1.00  | 1.00 change | UNCONTROLLED SEIZURE | PG       |
| 0.50  | 1.00 change | SIDE EFFECTS         | OXC      |
| 4.33  | 1.00 no     |                      | 0.00 PHT |
|       | no          |                      | 0.00 LEV |
|       | no          |                      | 0.00 VPA |
|       | no          |                      | 0.00     |
|       | no          |                      | 0.00 CBZ |
|       | no          |                      | 0.00     |
|       | no          |                      | 0.00     |
|       | no          |                      | 0.00 VPA |
| 2.03  | 1.00 change | SIDE EFFECTS         | PG       |
| 7.07  | 1.00 add_on | UNCONTROLLED SEIZURE | LEV      |
| 55.87 | 1.00 no     |                      | 0.00 LEV |
| 87.20 | 1.00 change | SIDE EFFECTS         | OXC      |
| 0.00  | 1.00 change | SIDE EFFECTS         | PG       |
| 5.10  | 1.00 change | SIDE EFFECTS         | PG       |
| 0.97  | 1.00 add_on | SIDE EFFECTS         | PG       |
| 1.03  | 1.00 change | SIDE EFFECTS         | PG       |

|        |             |                      |          |
|--------|-------------|----------------------|----------|
| 12.17  | 1.00 change | SIDE EFFECTS         | VPA      |
| 122.23 | 1.00 change | UNCONTROLLED SEIZURE | CBZ      |
| 4.07   | 2.00 add_on | UNCONTROLLED SEIZURE | LEV      |
| 5.50   | 2.00 change | SIDE EFFECTS         | CBZ      |
| 128.90 | 1.00 add_on | UNCONTROLLED SEIZURE | LEV      |
| 9.17   | 1.00 change | SIDE EFFECTS         | LEV      |
| 1.00   | 1.00 change | SIDE EFFECTS         | LEV      |
| 121.77 | 1.00 no     |                      | 0.00 PG  |
| 156.23 | 2.00 no     |                      | 0.00 PG  |
| 112.63 | 1.00 no     |                      | 0.00 TPM |
| 10.60  | 2.00 add_on | UNCONTROLLED SEIZURE | OXC      |
| 14.13  | 1.00 no     |                      | 0.00 PG  |
| 1.03   | 1.00 change | SIDE EFFECTS         | PG       |
| 8.17   | 1.00 add_on | UNCONTROLLED SEIZURE | OXC      |
| 4.07   | 1.00 change | SIDE EFFECTS         | PHT      |
| 0.00   | 1.00 change | SIDE EFFECTS         | PG       |
| 36.53  | 1.00 no     |                      | 0.00 LEV |
| 28.40  | 1.00 change | UNCONTROLLED SEIZURE | LEV      |
| 2.03   | 1.00 change | SIDE EFFECTS         | CBZ      |
| 7.07   | 1.00 no     |                      | 0.00 LEV |
| 8.10   | 1.00 add_on | UNCONTROLLED SEIZURE | PG       |
| 64.87  | 1.00 no     |                      | 0.00 LEV |
| 109.57 | 2.00 add_on | UNCONTROLLED SEIZURE | LEV      |
| 107.53 | 2.00 add_on | UNCONTROLLED SEIZURE | CBZ      |
| 7.70   | 1.00 change | UNCONTROLLED SEIZURE | PG       |
| 1.00   | 2.00 add_on | UNCONTROLLED SEIZURE | OXC      |
| 2.03   | 1.00 change | SIDE EFFECTS         | CBZ      |
| 111.60 | 1.00 change | UNCONTROLLED SEIZURE | TPM      |
| 0.00   | 2.00 add_on | UNCONTROLLED SEIZURE | CBZ      |
| 84.73  | 1.00 add_on | UNCONTROLLED SEIZURE | CBZ      |
| 4.10   | 2.00 add_on | UNCONTROLLED SEIZURE | LEV      |
| 4.10   | 1.00 no     |                      | 0.00 LEV |
| 0.00   | 1.00 no     |                      | 0.00 LEV |
| 11.13  | 1.00 change | SIDE EFFECTS         | LEV      |
| -1.03  | 1.00 no     |                      | 0.00 LEV |
| 12.17  | 2.00 change | UNCONTROLLED SEIZURE | CBZ      |
| 0.00   | 2.00 change | SIDE EFFECTS         | LEV      |
| 4.10   | 1.00 add_on | UNCONTROLLED SEIZURE | PG       |
| 199.83 | 1.00 no     |                      | 0.00 PG  |
| 19.30  | 1.00 change | SIDE EFFECTS         | PG       |
| 0.00   | 2.00 add_on | UNCONTROLLED SEIZURE | OXC      |
| 133.90 | 2.00 change | UNCONTROLLED SEIZURE | PHT      |

|        |             |                      |          |
|--------|-------------|----------------------|----------|
| 0.00   | 1.00 add_on | UNCONTROLLED SEIZURE | LEV      |
| 0.00   | 1.00 change | SIDE EFFECTS         | PG       |
| 25.37  | 1.00 no     |                      | 0.00 LEV |
| 17.20  | 1.00 no     |                      | 0.00 OXC |
| 1.03   | 1.00 no     |                      | 0.00 PG  |
| 63.47  | 2.00 no     |                      | 0.00 TPM |
| 0.00   | 1.00 change | UNCONTROLLED SEIZURE | PG       |
| 0.00   | 1.00 add_on | UNCONTROLLED SEIZURE | LEV      |
| -6.10  | 2.00 add_on | UNCONTROLLED SEIZURE |          |
| 2.03   | 2.00 change | UNCONTROLLED SEIZURE | LEV      |
| 11.17  | 2.00 change | UNCONTROLLED SEIZURE | PG       |
| -2.07  | 1.00 add_on | UNCONTROLLED SEIZURE | OXC      |
| 16.23  | 2.00 add_on | UNCONTROLLED SEIZURE | TPM      |
| -3.60  | 2.00 add_on | UNCONTROLLED SEIZURE | LEV      |
| 13.17  | 1.00 no     |                      | 0.00 LEV |
| 5.03   | 1.00 add_on | UNCONTROLLED SEIZURE | LEV      |
| 0.00   | 1.00 add_on | UNCONTROLLED SEIZURE | LEV      |
| -7.07  | 1.00 no     |                      | 0.00 LEV |
| 0.00   | 2.00 add_on | UNCONTROLLED SEIZURE | LEV      |
| 119.23 | 1.00 change | SIDE EFFECTS         | PG       |
| 6.03   | 1.00 change | SIDE EFFECTS         | OXC      |
| 1.03   | 1.00 change | SIDE EFFECTS         | PHT      |
|        | 1.00 no     |                      | 0.00 PG  |
| 440.33 | 1.00 change | SIDE EFFECTS         | OXC      |
| 0.00   | 1.00 no     |                      | 0.00 LEV |
| 2.03   | 1.00 add_on | UNCONTROLLED SEIZURE | LEV      |
| 4.07   | 1.00 change | SIDE EFFECTS         | OXC      |
|        | 1.00 no     |                      | 0.00 LEV |
| 94.90  | 1.00 add_on | UNCONTROLLED SEIZURE | OXC      |
| 6.67   | 2.00 change | SIDE EFFECTS         | LEV      |
| 1.03   | 2.00 change | SIDE EFFECTS         | LEV      |
| 0.00   | 2.00 change | UNCONTROLLED SEIZURE | PG       |
| 1.03   | 1.00 no     |                      | 0.00 PG  |
| 3.00   | 1.00 no     |                      | 0.00 PG  |
| 4.07   | 1.00 add_on | UNCONTROLLED SEIZURE | LEV      |
| 3.00   | 1.00 no     |                      | 0.00 CBZ |
| 13.20  | 1.00 no     |                      | 0.00 TPM |
| 6.13   | 1.00 no     |                      | 0.00 OXC |
| 4.07   | 1.00 no     |                      | 0.00 PG  |
| 3.07   | 1.00 no     |                      | 0.00 LEV |
| 21.27  | 1.00 no     |                      | 0.00 PG  |
| 5.10   | 1.00 no     |                      | 0.00 OXC |

|        |             |                      |          |
|--------|-------------|----------------------|----------|
| 7.07   | 1.00 no     |                      | 0.00 LEV |
|        | 1.00        |                      | LEV      |
| 12.17  | change      | SIDE EFFECTS         | PG       |
| 23.87  | no          |                      | 0.00 OXC |
| 23.90  | 1.00 change | SIDE EFFECTS         | PHT      |
| 23.90  | no          |                      | 0.00 OXC |
| 11.70  | change      |                      | PG       |
| 43.47  | 2.00 no     |                      | 0.00     |
| 49.23  | change      | SCARCE COMPLIANCE    |          |
|        |             |                      | PG       |
|        |             |                      | LEV      |
| 10.20  | change      | SIDE EFFECTS         | PG       |
| 2.03   | add_on      | SIDE EFFECTS         | PG       |
|        |             |                      | PG       |
|        |             |                      | LEV      |
| 4.00   | change      | SCARCE COMPLIANCE    | PG       |
| 1.03   | change      | SIDE EFFECTS         | PG       |
|        |             |                      | CBZ      |
|        |             |                      | LEV      |
|        |             |                      | PG       |
|        | change      | SIDE EFFECTS         | PG       |
| 0.00   | change      | OTHER                | CBZ      |
| 2.03   | change      | SIDE EFFECTS         | PG       |
| 0.00   | change      | SIDE EFFECTS         | LEV      |
|        |             |                      | LEV      |
| 0.97   | change      | SIDE EFFECTS         | PHT      |
|        | add_on      | UNCONTROLLED SEIZURE | LEV      |
|        |             |                      | PG       |
| 0.00   | change      |                      | PG       |
| 1.03   | no          |                      | 0.00 PG  |
|        |             | SCARCE COMPLIANCE    | CBZ      |
|        |             |                      | LEV      |
| 402.23 | change      | SIDE EFFECTS         | PG       |
| 12.17  | change      | SIDE EFFECTS         | PG       |
|        |             |                      | PG       |
|        |             |                      | LEV      |
|        |             |                      | LEV      |
|        |             |                      | PG       |
| 19.33  | 1.00 change | UNCONTROLLED SEIZURE | CBZ      |
| 19.40  | 1.00 no     |                      | 0.00     |
| 1.03   | 1.00 change | UNCONTROLLED SEIZURE | PG       |

|        |             |                                   |          |
|--------|-------------|-----------------------------------|----------|
| 8.17   | 1.00 change | UNCONTROLLED SEIZURE              | LEV      |
| 37.57  | 1.00 add_on | UNCONTROLLED SEIZURE              | PG       |
|        |             |                                   | PHT      |
|        |             |                                   | CBZ      |
|        |             |                                   | LEV      |
|        |             |                                   | LEV      |
|        | 1.00        |                                   | PG       |
|        | 1.00        |                                   | CBZ      |
|        | 1.00 add_on | UNCONTROLLED SEIZURE              | TPM      |
|        | 1.00 add_on | UNCONTROLLED SEIZURE              | CBZ      |
|        | 1.00 no     |                                   | 0.00 CBZ |
|        | 1.00 no     |                                   | 0.00 PG  |
|        | 1.00 no     |                                   | 0.00 PG  |
|        | 1.00 no     |                                   | 0.00 PHT |
|        | 1.00 change | UNCONTROLLED SEIZURE              | CBZ      |
| 24.33  | 1.00 add_on | UNCONTROLLED SEIZURE              | CBZ      |
|        | 1.00        |                                   |          |
| 108.00 | 1.00 add_on | UNCONTROLLED SEIZURE              | PG       |
| 127.07 | 1.00 add_on | UNCONTROLLED SEIZURE              | CBZ      |
| 4.90   | 1.00 change | SIDE EFFECTS                      | CBZ      |
| 101.47 | 2.00 change | SIDE EFFECTS                      | VPA      |
| 1.03   | 1.00 change | SIDE EFFECTS                      | VPA      |
| 13.73  | 2.00 no     |                                   | 0.00 LEV |
| 20.03  | no          |                                   | 0.00 LEV |
| 32.73  | no          |                                   | 0.00 LEV |
| 24.40  | no          |                                   | 0.00 LEV |
| 35.07  | no          |                                   | 0.00 LEV |
| 3.07   | 1.00 add_on | UNCONTROLLED SEIZURE              | CBZ      |
| 1.03   | 1.00 change | SCARCE COMPLIANCE                 | LEV      |
| 14.77  | 1.00 change | SIDE EFFECTS                      | CBZ      |
| 39.27  | 1.00 no     |                                   | 0.00 LEV |
| 41.93  | no          |                                   | 0.00 OXC |
| 47.67  | 1.00 add_on | UNCONTROLLED SEIZURE              | VPA      |
| 24.37  | 2.00 add_on | UNCONTROLLED SEIZURE              | VPA      |
| 20.53  | 1.00 no     |                                   | 0.00 LEV |
| 7.07   | 2.00 change | SIDE EFFECTS                      | CBZ      |
| 74.10  | 1.00 no     |                                   | 0.00 LEV |
| 3.93   | no          |                                   | 0.00 LEV |
| 1.03   | 2.00 add_on | UNCONTROLLED SEIZURE              | LEV      |
| 7.77   | 1.00 no     |                                   | 0.00 LEV |
| 26.87  | add_on      | UNCONTROLLED SEIZURE              | VPA      |
| 6.10   | 2.00 add_on | SIDE EFFECTS+UNCONTROLLED SEIZURE | CBZ      |

|       |      |        |                      |     |
|-------|------|--------|----------------------|-----|
| 16.03 | no   |        | 0.00                 | LEV |
| 3.90  | no   |        | 0.00                 | OXC |
| 14.20 | 1.00 | no     | 0.00                 | CBZ |
| 18.30 | 1.00 | no     | 0.00                 | LEV |
| 11.20 | 1.00 | no     | 0.00                 | LEV |
| 17.20 | 1.00 | change | UNCONTROLLED SEIZURE | OXC |
| 25.37 | 1.00 | no     | 0.00                 | PG  |
| 12.17 | 1.00 | no     | 0.00                 | LEV |
| 11.20 | 1.00 | change | UNCONTROLLED SEIZURE | CBZ |
| 4.00  | 1.00 | no     | 0.00                 | PG  |
| 18.27 | 1.00 | no     | 0.00                 | VPA |
| 24.37 | 1.00 | no     | 0.00                 | LEV |
| 8.07  | 1.00 | add_on | UNCONTROLLED SEIZURE | OXC |
| 31.50 | 1.00 | add_on | UNCONTROLLED SEIZURE | CBZ |
| 9.10  | 1.00 | no     | 0.00                 | LEV |
| 1.03  | 1.00 | add_on | UNCONTROLLED SEIZURE | PG  |
| 10.20 | 1.00 | no     | 0.00                 | PG  |
| 20.27 | 1.00 | change | UNCONTROLLED SEIZURE | CBZ |
| 11.20 | 1.00 | no     | 0.00                 | VPA |
| 10.13 | 1.00 | change | UNCONTROLLED SEIZURE | LEV |
| 11.13 | 1.00 | no     | 0.00                 | LEV |
| 72.03 | 1.00 | no     | 0.00                 | PG  |
| 55.80 | 1.00 | no     | 0.00                 | PG  |
| 8.10  | 1.00 | add_on | UNCONTROLLED SEIZURE | CBZ |
| 10.13 | 1.00 | add_on | UNCONTROLLED SEIZURE | CBZ |
| 26.43 | 1.00 | no     | 0.00                 | LEV |
| 32.40 | 1.00 | no     | 0.00                 | LEV |
| 22.37 | 1.00 | no     | 0.00                 | LEV |
| 45.63 | 1.00 | no     | 0.00                 | CBZ |
| 23.40 | 1.00 | no     | 0.00                 | VPA |
| 8.13  | 1.00 | no     | 0.00                 | VPA |
| 39.60 | 1.00 | no     | 0.00                 | PG  |
| 14.17 | 1.00 | add_on | SIDE EFFECTS         | PG  |
| 5.10  | 1.00 | add_on | SIDE EFFECTS         | PG  |
| 5.10  | 1.00 | add_on | UNCONTROLLED SEIZURE | PG  |
| 15.23 | 1.00 | no     | 0.00                 | VPA |
| 3.07  | 1.00 | change | SIDE EFFECTS         | OXC |
| 97.40 | 1.00 | no     | 0.00                 | VPA |
| 20.27 | 1.00 | add_on | UNCONTROLLED SEIZURE | VPA |
| 13.20 | 1.00 | change | UNCONTROLLED SEIZURE | OXC |
| 8.17  | 1.00 | change | SIDE EFFECTS         | VPA |
|       | 1.00 | change | UNCONTROLLED SEIZURE | PHT |

|        |             |                      |          |
|--------|-------------|----------------------|----------|
| 143.60 | 1.00 add_on | UNCONTROLLED SEIZURE | PG       |
| 93.87  | 1.00 add_on | UNCONTROLLED SEIZURE | CBZ      |
|        | 1.00 change | SIDE EFFECTS         | OXC      |
| 182.63 | 1.00 no     |                      | 0.00     |
| 89.83  | 1.00 add_on | UNCONTROLLED SEIZURE | VPA      |
| 77.67  | 1.00 add_on | UNCONTROLLED SEIZURE | VPA      |
| 0.00   | 1.00 change | SIDE EFFECTS         | CBZ      |
| 0.93   | 1.00 change | SIDE EFFECTS         | CBZ      |
|        | 1.00 change | UNCONTROLLED SEIZURE | PHT      |
| 2.03   | 1.00 change | UNCONTROLLED SEIZURE | VPA      |
| 12.17  | 1.00 change | SIDE EFFECTS         | PG       |
| 12.20  | 1.00 add_on | UNCONTROLLED SEIZURE | PHT      |
| 50.73  | 1.00 change | SIDE EFFECTS         | VPA      |
| 66.90  | 1.00 no     |                      | 0.00 OXC |
| 0.00   | 1.00 add_on | UNCONTROLLED SEIZURE | LEV      |
| 91.90  | 1.00 no     |                      | 0.00 OXC |
| 32.50  | 1.00 no     |                      | 0.00 OXC |
| 61.40  | 1.00 no     |                      | 0.00 CBZ |
| 11.17  | 1.00 add_on | UNCONTROLLED SEIZURE | OXC      |
| 11.17  | 1.00 change | SIDE EFFECTS         | CBZ      |
| 39.10  | 1.00 change | SIDE EFFECTS         | PG       |
| 82.17  | 1.00 no     |                      | 0.00 OXC |
| 11.13  | 1.00 change | UNCONTROLLED SEIZURE | VPA      |
|        | 1.00 no     |                      | 0.00 PG  |
| 25.33  | 1.00 change | SIDE EFFECTS         | VPA      |
| 0.00   | 1.00 add_on | UNCONTROLLED SEIZURE | VPA      |
| 31.43  | 1.00 add_on | UNCONTROLLED SEIZURE | OXC      |
| 26.37  | 1.00 no     |                      | 0.00 OXC |
| 34.47  | 1.00 no     |                      | 0.00     |
| 15.23  | 1.00 change | UNCONTROLLED SEIZURE | VPA      |
|        | 1.00 add_on | UNCONTROLLED SEIZURE | CBZ      |
| 15.23  | 1.00 change | UNCONTROLLED SEIZURE |          |
| 121.30 | 1.00 add_on | UNCONTROLLED SEIZURE | LEV      |
| 15.23  | 1.00 no     |                      | 0.00 LEV |
| 55.77  | 1.00 no     |                      | 0.00 OXC |
| 152.20 | 1.00 change | SIDE EFFECTS         | PG       |
| 15.77  | 1.00 change | UNCONTROLLED SEIZURE | CBZ      |
| 64.93  | 1.00 no     |                      | 0.00 CBZ |
| 79.73  | 1.00 add_on | UNCONTROLLED SEIZURE | PG       |
| 40.13  | 1.00 change | UNCONTROLLED SEIZURE | PG       |
| 19.30  | 1.00 add_on | UNCONTROLLED SEIZURE | OXC      |
| 4.07   | 1.00 change | UNCONTROLLED SEIZURE | TPM      |

|        |             |                      |          |
|--------|-------------|----------------------|----------|
| 36.07  | 1.00 change | SIDE EFFECTS         | VPA      |
| 9.20   | 1.00 change | UNCONTROLLED SEIZURE | VPA      |
| 22.30  | 1.00 change | SIDE EFFECTS         | OXC      |
| 183.10 | 1.00 add_on | UNCONTROLLED SEIZURE | CBZ      |
| 8.90   | 1.00 no     |                      | 0.00 PG  |
| 24.33  | 1.00 change | UNCONTROLLED SEIZURE | CBZ      |
| 0.00   | 1.00 change | UNCONTROLLED SEIZURE | PHT      |
| 12.20  | 1.00 change | UNCONTROLLED SEIZURE | PG       |
| 3.17   | 1.00 no     |                      | 0.00 PHT |
| 7.20   | 1.00 no     |                      | 0.00 PHT |
| 8.37   | 1.00 no     |                      | 0.00     |
| 24.97  | 1.00 no     |                      | 0.00 PG  |
| 24.97  | 1.00 no     |                      | 0.00 OXC |
| 8.13   | 1.00 change | UNCONTROLLED SEIZURE | LEV      |
| 26.80  | 1.00 change | UNCONTROLLED SEIZURE | PG       |
| 18.23  | 1.00 no     |                      | 0.00 VPA |
| 43.13  | 1.00 no     |                      | 0.00 OXC |
| 90.73  | 1.00 no     |                      | 0.00 PG  |
| 118.20 | 1.00 no     |                      | 0.00 OXC |
| 1.60   | 1.00 add_on | UNCONTROLLED SEIZURE | PHT      |
| 43.00  | 1.00 no     |                      | 0.00 LEV |
| 8.87   | 1.00 no     |                      | 0.00 LEV |
| 215.70 | 1.00 no     |                      | 0.00     |
| 95.33  | 1.00 no     |                      | 0.00 OXC |
| 70.43  | 1.00 no     |                      | 0.00 PG  |
|        | 1.00 add_on | UNCONTROLLED SEIZURE | PHT      |
| 58.33  | 1.00 no     |                      | 0.00 LEV |
| 26.87  | 1.00 no     |                      | 0.00 CBZ |
| 29.97  | 1.00 no     |                      | 0.00 LEV |
| 11.53  | 1.00 no     |                      | 0.00 LEV |
| 272.50 | 1.00 no     |                      | 0.00 CBZ |
| 69.17  | 1.00 no     |                      | 0.00 LEV |
| 14.10  | 1.00 no     |                      | 0.00 LEV |
| 37.57  | 1.00 no     |                      | 0.00 PHT |
| 57.20  | 1.00 no     |                      | 0.00 OXC |
| 17.43  | 1.00 no     |                      | 0.00 PG  |
| 178.73 | 1.00 no     |                      | 0.00 CBZ |
| 1.53   | 1.00 no     |                      | 0.00 LEV |
| 61.33  | 1.00 no     |                      | 0.00 LEV |
| 16.57  | 1.00 change | SIDE EFFECTS         | PG       |
| 30.73  | 1.00 no     |                      | 0.00 LEV |
| 1.00   | 1.00 change |                      | PHT      |



|        |             |                      |          |
|--------|-------------|----------------------|----------|
| 7.50   | 1.00 no     |                      | 0.00 CBZ |
| 55.30  | 1.00 change | UNCONTROLLED SEIZURE |          |
| 8.43   | 1.00 no     |                      | 0.00 LEV |
| 10.20  | 1.00 no     |                      | 0.00 OXC |
| 4.50   | 1.00 add_on | UNCONTROLLED SEIZURE | LEV      |
| 26.77  | 1.00 change |                      |          |
| 75.37  | 1.00 no     |                      | 0.00 PG  |
| 25.40  | 1.00 change | UNCONTROLLED SEIZURE | CBZ      |
| 31.23  | 1.00 no     |                      | 0.00 LEV |
| 74.63  | 1.00 no     |                      | 0.00 OXC |
| 6.30   | 1.00 add_on | UNCONTROLLED SEIZURE | LEV      |
| 17.63  | 1.00 add_on | UNCONTROLLED SEIZURE | PHT      |
| 27.40  | 1.00 change |                      | PG       |
| 55.77  | 1.00 no     |                      | 0.00 PG  |
| 191.83 | 1.00 no     |                      | 0.00 CBZ |
| 169.37 | 1.00 no     |                      | 0.00 PG  |
| 11.37  | 1.00 change | SIDE EFFECTS         | LEV      |
| 55.37  | 1.00 no     |                      | 0.00 LEV |
| 60.60  | 1.00 no     |                      | 0.00 LEV |
| 102.87 | 1.00 change |                      | PG       |
| 49.90  | 1.00 no     |                      | 0.00 PG  |
| 17.03  | 1.00 change | UNCONTROLLED SEIZURE | PHT      |
| 13.67  | 1.00 no     |                      | 0.00     |
| 72.90  | 1.00 no     |                      | 0.00 CBZ |
| 11.20  | 1.00 no     |                      | 0.00 OXC |
| 87.27  | 1.00 add_on | UNCONTROLLED SEIZURE | PG       |
| 51.10  | 1.00 no     |                      | 0.00 LEV |
| 14.47  | 1.00 no     |                      | 0.00 LEV |
| 66.30  | 1.00 no     |                      | 0.00 CBZ |
| 43.57  | 1.00 no     |                      | 0.00 CBZ |
| 129.57 | 1.00 add_on | UNCONTROLLED SEIZURE | VPA      |
| 4.57   | 1.00 no     |                      | 0.00 OXC |
|        | 1.00 no     |                      | 0.00 LEV |
| 26.13  | 1.00 no     |                      | 0.00 LEV |
| 86.37  | 1.00 no     |                      | 0.00 OXC |
| 0.90   | 1.00 add_on | UNCONTROLLED SEIZURE | LEV      |
| 15.50  | 1.00 no     |                      | 0.00 LEV |
| 55.00  | 1.00 no     |                      | 0.00 LEV |
| 4.90   | 1.00 no     |                      | 0.00 LEV |
|        | 1.00 no     |                      | 0.00 LEV |
| 9.30   | 1.00 no     |                      | 0.00 LEV |
| 20.87  | 1.00 change |                      | PG       |

|       |      |        |                      |      |     |
|-------|------|--------|----------------------|------|-----|
| 4.40  | 1.00 | no     |                      | 0.00 | LEV |
| 5.10  | 1.00 | no     |                      | 0.00 | LEV |
| 10.37 | 1.00 | no     |                      | 0.00 | LEV |
| 4.43  | 1.00 | add_on | UNCONTROLLED SEIZURE |      | LEV |
| 2.03  | 1.00 | no     |                      | 0.00 | LEV |
| 4.03  | 1.00 | add_on | UNCONTROLLED SEIZURE |      | LEV |
| 5.20  | 1.00 | no     |                      | 0.00 | LEV |
| 45.67 | 1.00 | no     |                      | 0.00 | LEV |
| 16.97 | 1.00 | no     |                      | 0.00 | LEV |
| 13.40 | 1.00 | no     |                      | 0.00 |     |
| 8.50  | 1.00 | no     |                      | 0.00 | LEV |
| 4.87  | 1.00 | add_on | UNCONTROLLED SEIZURE |      | LEV |
| 46.17 | 1.00 | no     |                      | 0.00 |     |
| 1.63  | 1.00 | no     |                      | 0.00 | LEV |
| 11.30 | 1.00 | change | UNCONTROLLED SEIZURE |      | PG  |
| 19.87 | 1.00 | no     |                      | 0.00 | LEV |
| 4.63  | 1.00 | add_on | UNCONTROLLED SEIZURE |      | LEV |
| 14.87 | 1.00 | no     |                      | 0.00 | PG  |
| 14.97 | 1.00 | no     |                      | 0.00 |     |
| 0.93  | 1.00 | no     |                      | 0.00 | LEV |
| 9.30  | 1.00 | no     |                      | 0.00 | LEV |
| 10.00 | 1.00 | no     |                      | 0.00 | LEV |
| 14.57 | 1.00 | no     |                      | 0.00 | LEV |
| 3.53  | 1.00 | no     |                      | 0.00 | LEV |

CBZ  
PHT

LEV  
PHT  
PG  
CBZ  
PG  
OXC  
OXC  
PG  
CBZ  
VPA  
VPA  
LEV  
OXC  
OXC

OXC  
VPA  
VPA  
LEV  
PG  
OXC  
LEV  
LEV  
CBZ  
TPM  
LEV  
LEV  
PG  
LEV  
VPA  
VPA  
CBZ  
LEV  
LEV  
CBZ  
LEV  
CBZ  
VPA  
LEV  
CBZ  
LEV  
LEV  
VPA  
CBZ  
LEV  
LEV  
OXC  
PG  
TPM  
PG  
CBZ  
OXC  
LEV  
LEV

CBZ

LEV

PHT

PG

PG

VPA

PHT

CBZ

LEV

CBZ

VPA

VPA

LEV

LEV

VPA

LEV

LEV

CBZ

LEV

LEV

LEV

LEV

LEV

TPM

PHT

LEV

LEV

LEV

LEV

VPA

LEV

LEV

LEV

OXC

PG

CBZ

LEV

LEV

CBZ

LEV

OXC

LEV  
PG  
PHT  
LEV  
LEV  
VPA  
TPM  
PG  
LEV  
VPA  
LEV  
LEV  
LEV  
LEV  
LEV  
LEV  
PG  
LEV  
LEV  
LEV  
OXC  
LEV  
OXC

CBZ  
LEV  
LEV  
LEV  
PHT  
LEV  
LEV  
LEV  
LEV  
LEV  
LEV  
CBZ  
LEV  
LEV  
LEV  
LEV  
LEV  
LEV  
LEV  
LEV

LEV  
PG  
LEV  
LEV  
CBZ  
LEV  
PG  
LEV  
LEV  
CBZ  
LEV  
LEV  
CBZ  
VPA  
LEV  
LEV  
LEV

CBZ  
LEV  
LEV  
VPA  
OXC  
LEV  
LEV  
PHT  
OXC  
LEV  
LEV  
LEV

LEV  
LEV  
PHT  
VPA  
VPA  
LEV  
LEV  
VPA  
LEV  
PG  
LEV

LEV  
LEV  
LEV

LEV  
PG  
LEV  
LEV  
TPM  
LEV  
LEV  
LEV  
LEV

LEV

PHT  
LEV  
LEV  
LEV  
LEV  
CBZ  
LEV  
CBZ  
LEV  
OXC  
LEV  
LEV

VPA  
PHT  
LEV  
LEV  
LEV  
LEV  
LEV  
LEV  
LEV  
VPA  
OXC  
OXC  
PG

OXC  
LEV  
VPA  
LEV  
OXC  
LEV  
VPA  
LEV  
LEV  
LEV  
OXC  
LEV  
VPA
